# Supplementary material for: Improving Geometric Validation Metrics and Ensuring Consistency with Experimental Data through TrioSA: An NMR Refinement Protocol
Source: MDPI journal article supplement (doi:10.3390/ijms241713337), 2023-08-28
Supplement: s1 [file s1]

## *Supplementary Material*

# **Improving Geometric Validation Metrics and Ensuring Consistency with experimental data through TrioSA: An NMR Refinement Protocol**

**Article type:** ORIGINAL RESEARCH

### **Authors and affiliations:**

Youngbeom Cho\*<sup>†,‡</sup> Hyojung Ryu,<sup>†</sup> Gyutae Lim,<sup>†</sup> Seungyeon Nam<sup>§,¶</sup> Jinhyuk Lee<sup>§<sup>†,‡</sup></sup>

\*First author

§Corresponding author

<sup>†</sup>Department of Bioinformatics, KRIBB School of Bioscience, University of Science and Technology (UST), Daejeon 34141, Republic of Korea

<sup>‡</sup>Disease Target Structure Research Center, Korea Research Institute of Bioscience and Biotechnology (KRIBB), Daejeon 34141, Republic of Korea

<sup>¶</sup>Department of Genome Medicine and Science, AI Convergence Center for Medical Science, Gachon Institute of Genome Medicine and Science, Gachon University Gil Medical Center, Gachon University College of Medicine, Incheon, 21565, Korea; Department of Health Sciences and Technology, Gachon Advanced Institute for Health Sciences and Technology, Gachon University, Incheon 21999, Korea

### **Corresponding author:**

Jinhyuk Lee, Disease Target Structure Research Center, Korea Research Institute of Bioscience and Biotechnology (KRIBB), Daejeon 34141, Korea, [jinhyuk@kribb.re.kr](mailto:jinhyuk@kribb.re.kr)

### **Supplementary information includes:**

S1: Supplementary Figures S1-S3

S2: Supplementary Tables S1-S5

S3. Supplementary Excel Tables, provided as Supplementary files 2-6

**Figure S1.** Comparison of structural quality metrics for five NMR refinement protocols, including Initial, SA, SA+GBSW, SA+STAP, and Refined (SA+GBSW+STAP) from 2017 to 2022. Histograms depict the distribution of (A) normalized DOPE score, (B) Clashscore, (C) Ramachandran score (residues in the allowed region), and (D) Rotamer normality Z-score. These metrics were used to assess the improvement in structural quality of the refinement protocols. Standard deviation bars represent the variability in the data for each refinement protocol.

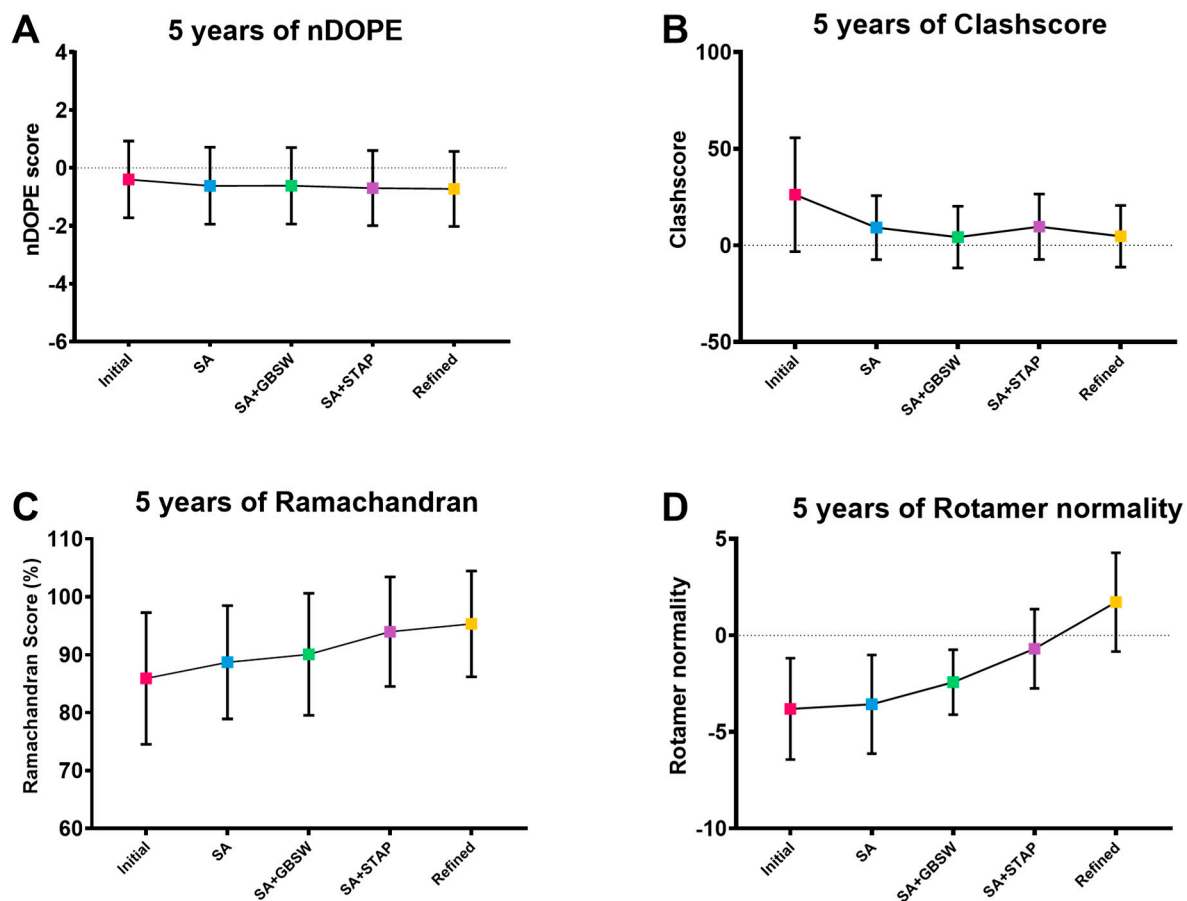

**Figure S2.** Histograms showing the distribution of structural quality metrics for X-ray and NMR structures from 1976 to 2022. (A) Normalized DOPE score, (B) Clashscore, (C) Ramachandran score (percentage of residues in allowed regions), and (D) Rotamer normality Z-score.

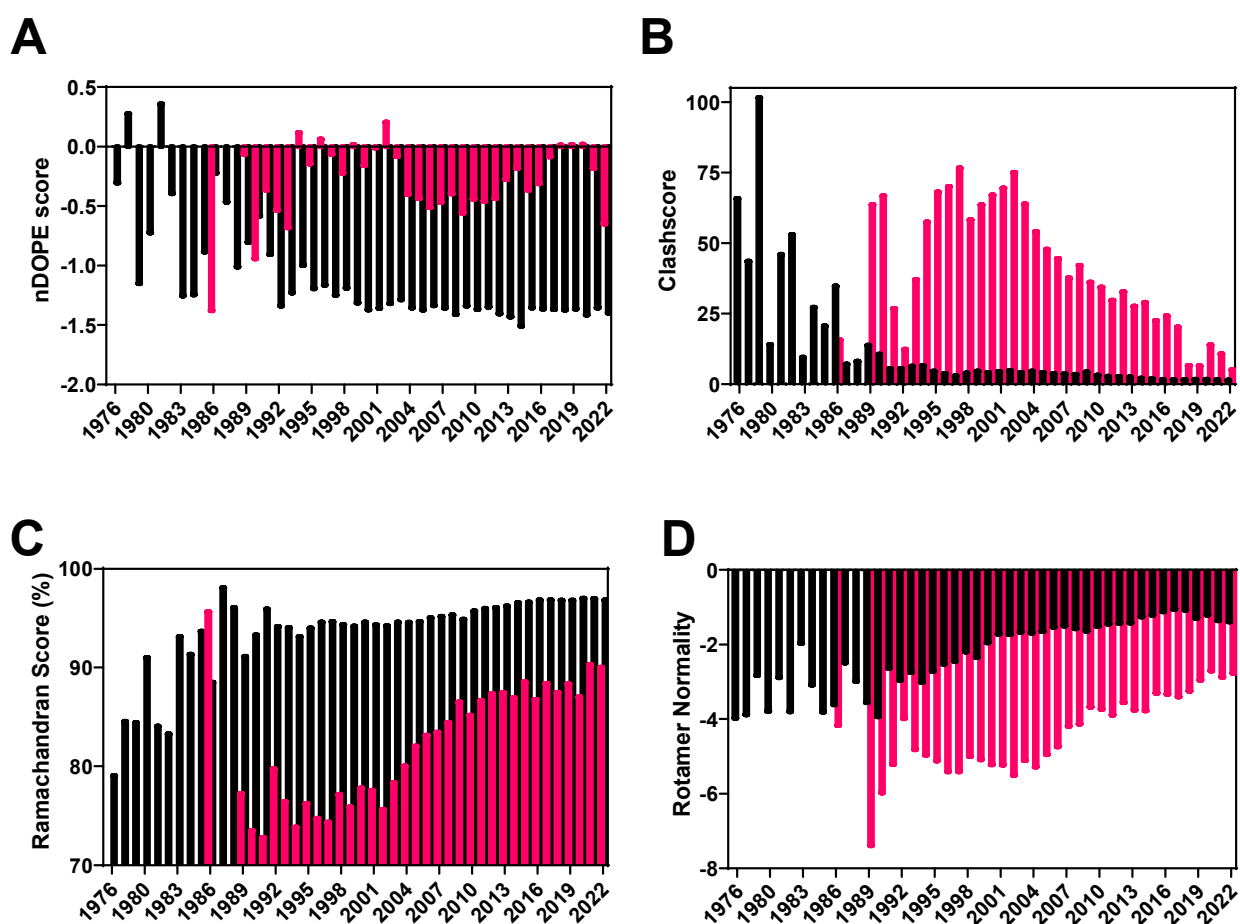

**Figure S3** Scatter plot of Geometrical Validation Metrics vs TM-score. (A) shows the scatter plot of nDOPE vs TM-score, separated by the range of TM-score (all, 0.5>, 0.8>). (B) displays the scatter plot of Ramachandran score vs TM-score, separated by the range of TM-score (all, 0.5>, 0.8>). (C) shows the scatter plot of Clashscore vs TM-score, separated by the range of TM-score (all, 0.5>, 0.8>). Finally, (D) presents the scatter plot of Rotamer normality vs TM-score, separated by the range of TM-score (all, 0.5>, 0.8>).

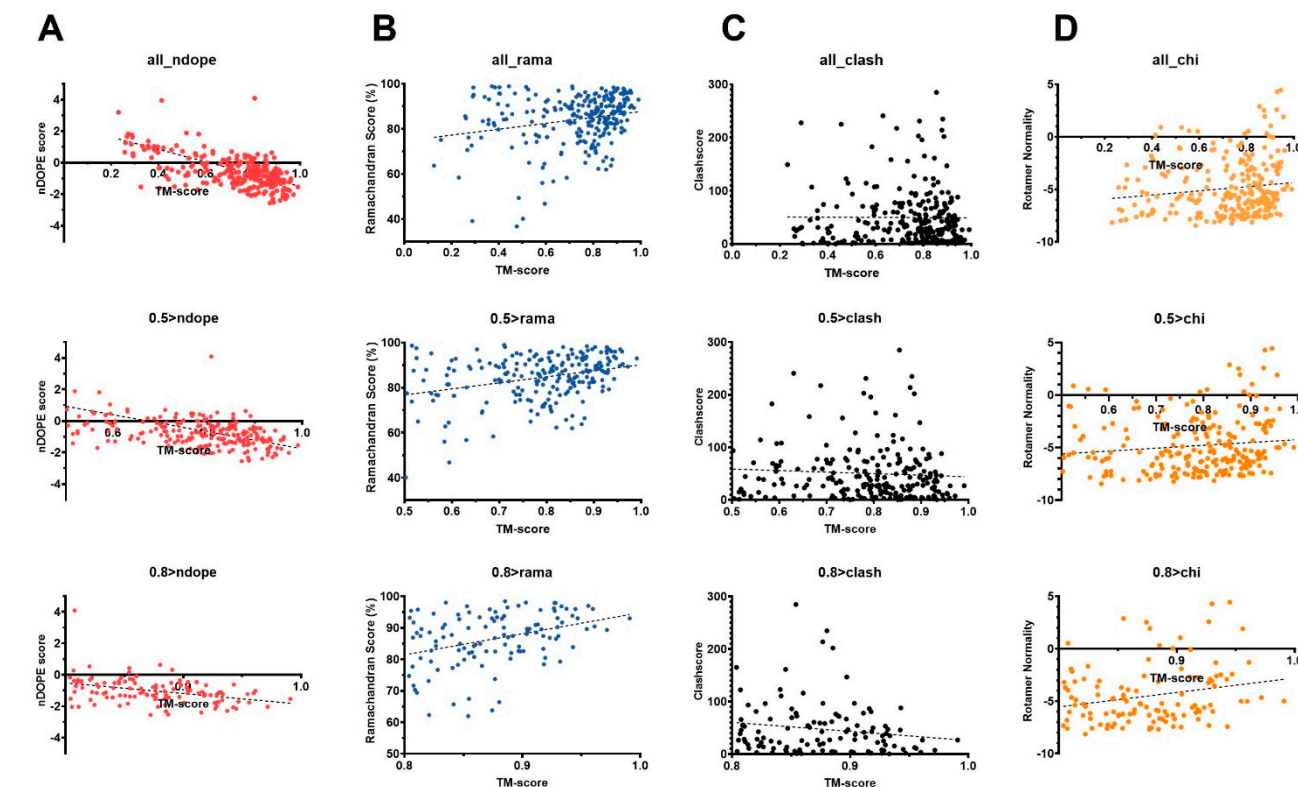

**Table S1.** Comparative analysis of geometrical validation metrics before and after refinement using TrioSA and RECOORD database.

|         | nDOPE |      | Clashscore |       | Ramachandra score |       | Rotamer normality |      |
|---------|-------|------|------------|-------|-------------------|-------|-------------------|------|
|         | Mean  | SD   | Mean       | SD    | Mean              | SD    | Mean              | SD   |
| Initial | -0.20 | 1.01 | 74.14      | 61.87 | 77.06             | 12.22 | -6.21             | 1.92 |
| Refined | -0.94 | 1.08 | 3.09       | 3.00  | 95.89             | 3.81  | 2.24              | 1.73 |
| CNS     | -0.40 | 0.93 | 21.36      | 15.85 | 79.32             | 9.93  | -2.35             | 1.58 |
| CNW     | -0.93 | 0.91 | 15.50      | 7.42  | 81.72             | 7.54  | -2.49             | 1.11 |
| CYA     | -0.17 | 0.94 | 59.89      | 32.93 | 69.08             | 11.22 | -7.27             | 0.54 |
| CYW     | -0.93 | 0.91 | 15.80      | 7.38  | 81.08             | 7.51  | -2.78             | 1.10 |

**Table S2.** Validation Assessment of 3,752 Initial and Refined NMR Protein Structures. The Z-score indicates a positive value above the mean average. Using RMS Z-scores, a score of 1 represents an ideal result.

| Quality assessment scores     |                              | Initial structures     | Refined structures      |
|-------------------------------|------------------------------|------------------------|-------------------------|
| NOE violation                 | All                          | Max/RMSD               | 1.41/0.12               |
|                               |                              | Number of violated NOE | 0.71/0.07               |
|                               |                              | (0.0/0.5/1.0/2.0)      | 113.10/19.39/10.70/3.98 |
|                               | Intra                        | Max/RMSD               | 132.89/8.08/2.43/0.69   |
|                               |                              | Number of violated NOE | 0.41/0.05               |
|                               |                              | (0.0/0.5/1.0/2.0)      | 0.36/0.04               |
|                               | Sequential                   | Max/RMSD               | 23.24/3.37/1.40/0.47    |
|                               |                              | Number of violated NOE | 24.93/2.32/0.87/0.33    |
|                               |                              | (0.0/0.5/1.0/2.0)      | 0.67/0.08               |
|                               | Medium                       | Max/RMSD               | 0.51/0.07               |
|                               |                              | Number of violated NOE | 26.63/3.96/2.01/0.62    |
|                               |                              | (0.0/0.5/1.0/2.0)      | 37.43/2.15/0.54/0.12    |
| Geometrical validation scores | Long                         | Max/RMSD               | 0.90/0.14               |
|                               |                              | Number of violated NOE | 0.49/0.08               |
|                               |                              | (0.0/0.5/1.0/2.0)      | 27.54/4.40/2.50/0.85    |
|                               | Dihedral angle violation     | Max/RMSD               | 31.78/1.38/0.32/0.05    |
|                               |                              | Number of violated NOE | 1.10/0.18               |
|                               |                              | (0.0/0.5/1.0/2.0)      | 0.54/0.08               |
|                               | Optimal protein energy       | Max/Ave                | 35.68 /7.66/4.78/2.03   |
|                               |                              |                        | 38.74/2.23/0.70/0.19    |
|                               |                              |                        | 28.57/0.68              |
|                               | DOPE                         |                        | 17.12/0.52              |
|                               |                              |                        |                         |
|                               |                              |                        |                         |
|                               | nDOPE                        |                        |                         |
|                               |                              |                        |                         |
|                               |                              |                        |                         |
|                               | dDFIRE                       |                        |                         |
|                               |                              |                        |                         |
|                               |                              |                        |                         |
|                               | Steric clashscore            |                        |                         |
|                               |                              |                        |                         |
|                               |                              |                        |                         |
|                               | Ramachandran plot appearance |                        |                         |
|                               |                              |                        |                         |
|                               |                              |                        |                         |
|                               | MolProbity                   |                        |                         |
|                               |                              |                        |                         |
|                               |                              |                        |                         |
|                               | PROCHECK                     |                        |                         |
|                               |                              |                        |                         |
|                               |                              |                        |                         |
|                               | What_CHECK structure Z-score |                        |                         |
|                               |                              |                        |                         |
|                               |                              |                        |                         |
|                               | 1st pack                     |                        |                         |
|                               |                              |                        |                         |
|                               |                              |                        |                         |
|                               | 2nd pack                     |                        |                         |
|                               |                              |                        |                         |
|                               |                              |                        |                         |
|                               | Ramachandran plot appearance |                        |                         |
|                               |                              |                        |                         |
|                               |                              |                        |                         |
|                               | Rotamer normality            |                        |                         |
|                               |                              |                        |                         |
|                               |                              |                        |                         |
|                               | Backbone conformation        |                        |                         |
|                               |                              |                        |                         |
|                               |                              |                        |                         |

**Table S3.** The summary of predicting protein-ligand docking residues. MCC comparison of 14 pairs of X-ray and NMR protein structures

| X-ray pdb id | NMR pdb id | MCC of X-ray | MCC of initial NMR | MCC of refined NMR |
|--------------|------------|--------------|--------------------|--------------------|
| 1BWO         | 1GH1       | 0.761        | 0.225              | 0.396              |
| 1ES1         | 1J0Q       | 0.623        | 0.148              | 0.457              |
| 1HVV         | 1BVE       | 0.784        | 0.759              | 0.710              |
| 1M2M         | 1F04       | 0.721        | 0.365              | 0.289              |
| 2VBU         | 2P3M       | 0.925        | 0.645              | 0.652              |
| 3AKM         | 2MJI       | 0.902        | 0.435              | 0.591              |
| 3UQI         | 2LPV       | 0.703        | 0.278              | 0.422              |
| 4MNS         | 6R3C       | 0.872        | 0.294              | 0.476              |
| 5FSL         | 1IRY       | 0.868        | 0.263              | 0.205              |
| 7WW5         | 1MUT       | 0.694        | 0.417              | 0.630              |
| 7WW5         | 1TUM       | 0.694        | 0.304              | 0.399              |
| 3ZCF         | 1J3S       | 0.634        | 0.391              | 0.361              |
| 1CTQ         | 1CRP       | 0.754        | 0.774              | 0.796              |
| 5YOK         | 1Q9P       | 0.827        | 0.480              | 0.555              |

**Table S4.** The summary of maximum and average distance nuclear overhauser effect (NOE) RMSD of five NMR refinement protocols. In this analysis, 3,752 NMR protein structures with distance experimental data in BMRB were employed.

|         | Maximum distance NOE RMSD | Average distance NOE RMSD |
|---------|---------------------------|---------------------------|
| Initial | 1.41                      | 0.12                      |
| SA      | 0.68                      | 0.07                      |
| SA+GBSW | 0.61                      | 0.06                      |
| SA+STAP | 0.77                      | 0.08                      |
| TrioSA  | 0.71                      | 0.07                      |



**Table S5.** The summary of maximum and average dihedral angle nuclear NOE RMSD of five NMR refinement protocols. In this analysis, 2,318 NMR protein structures with dihedral angle experimental data in BMRB were employed.

|         | Maximum dihedral angle NOE RMSD | Average dihedral angle NOE RMSD |
|---------|---------------------------------|---------------------------------|
| Initial | 28.57                           | 0.68                            |
| SA      | 16.78                           | 0.54                            |
| SA+GBSW | 14.83                           | 0.47                            |
| SA+STAP | 17.10                           | 0.51                            |
| TrioSA  | 17.12                           | 0.52                            |



**S3: Supplementary Excel Tables, provided as additional files 2-6**

**3.1 Supplementary file 2**

The results of identify the appropriate MD steps and temperature

**3.2 Supplementary file 3**

The validation assessments of five NMR refinement protocols

**3.3 Supplementary file 4**

The results of analysis of distance NOE using five NMR refinement protocols.

**3.4 Supplementary file 5**

3,752 of Refined NMR protein structure PDB ID

**3.5 Supplementary file 6**

Comparative analysis of structural quality metrics for TrioSA and RECOORD database.
