# Supplementary material for: Improving Geometric Validation Metrics and Ensuring Consistency with Experimental Data through TrioSA: An NMR Refinement Protocol
Source: Int J Mol Sci. 2023 Aug 28;24(17):13337. doi: 10.3390/ijms241713337 (PMC10487420; doi:10.3390/ijms241713337)
Supplement: Supplementary file 1 [file ijms-24-13337-s001.zip]

Archive with 6 entries (6 files):
- Supplementary_file1_Supplementary information.pdf
- Supplementary_file2_The results of identifying the appropriate MD steps and temperature.xlsx
- Supplementary_file3_The validation assessments of five NMR refinement protocols.xlsx
- Supplementary_file4_The results of analysis of distance NOE using five NMR refinement protocols..xlsx
- Supplementary_file5_Refined_NMR_PDB_ID.xlsx
- Supplementary_file6_RECOORD.xlsx
