# Supplementary material for: Improving Geometric Validation Metrics and Ensuring Consistency with Experimental Data through TrioSA: An NMR Refinement Protocol
Source: Int J Mol Sci. 2023 Aug 28;24(17):13337. doi: 10.3390/ijms241713337 (PMC10487420; doi:10.3390/ijms241713337)
Supplement: Supplementary file 1 [file ijms-24-13337-s001.zip › Supplementary_file2_The results of identifying the appropriate MD steps and temperature.xlsx]

## Sheet: average
Additional File 2: Supplementary Excel Table
The results of identifying the appropriate MD steps and temperature
The investigation of appropriate molecular dynamics steps and temperatures for further NMR refinement protocol
Table. The validation assessments of refinement protocols
Protocols	DOPE	nDOPE	Dfire	Clash	RAMA Favored	RAMA Percent	RAMA allowed	RAMA outlier	Pro RAMA favoured	Pro RAMA additional	Pro RAMA generously allowed	Pro RAMA disallowed	1st packing quality	2nd packing quality	Ramachandran plot appearance	chi1/chi2 rotamer normality	Backbone conformation	Bond lengths	Bond angles	Omega angle restraints	Side chain planarity	Improper dihedral distribution	Inside/Outside distribution
Initial	-8399.51	-0.326245	-172.472	39.0796	84.2853	87.7308	9.68609	3.02865	80.5905	16.7191	1.91897	0.771556	-2.84046	-2.54063	-3.6306	-4.22987	-1.10179	0.609705	0.739357	0.395495	0.52065	0.653377	1.07961
refinea	-9081.44	-0.7475	-189.514	4.94122	93.0993	95.6875	3.01459	0.886159	92.1276	6.37277	0.771567	0.728277	-2.32036	-1.33021	2.66594	2.26799	-0.974147	0.714159	1.24619	1.72988	1.194	1.36102	1.07293
refine2x	-9171	-0.806496	-191.35	5.0947	93.2595	95.7855	2.92384	0.816658	92.295	6.22263	0.735483	0.747115	-2.19888	-1.22383	2.76239	2.42727	-0.958406	0.71352	1.24657	1.73268	1.19989	1.36396	1.07192
refine4x	-9225.55	-0.845484	-192.481	5.01362	93.3784	95.9442	2.82174	0.799855	92.5325	6.0432	0.722381	0.701157	-2.11639	-1.16433	2.87265	2.6056	-0.906621	0.712135	1.24468	1.72768	1.18988	1.35725	1.07198
refine6x	-9260.72	-0.86832	-193.139	5.05522	93.4363	96.0329	2.79766	0.766088	92.6777	5.93584	0.660581	0.726595	-2.09242	-1.1385	2.90612	2.65558	-0.907192	0.711719	1.24275	1.73831	1.18715	1.3526	1.07487
refine8x	-9285.03	-0.886108	-193.577	5.01592	93.4603	96.0107	2.77639	0.763386	92.7034	5.96621	0.673848	0.656692	-2.07352	-1.14179	2.90888	2.68385	-0.892878	0.711278	1.24162	1.72642	1.18674	1.35923	1.07463
refine1000k	-8935.42	-0.769188	-186.342	4.79163	93.328	95.8539	2.8629	0.809084	92.415	6.10995	0.77568	0.701193	-2.56419	-1.52351	2.59174	2.54722	-1.1748	0.714165	1.24435	1.77282	1.17077	1.34767	1.07109
refine1000k_2x	-9144.89	-0.82028	-190.975	4.80467	93.5864	96.1056	2.69396	0.719602	92.8246	5.87065	0.663402	0.643309	-2.20649	-1.20482	2.89947	2.83755	-0.929069	0.710533	1.23545	1.72533	1.17309	1.33715	1.07217
refine1000k_4x	-9235.21	-0.859816	-192.73	4.80662	93.8192	96.3615	2.55739	0.623356	93.2055	5.67693	0.516764	0.602523	-2.10985	-1.05502	3.03001	3.07528	-0.96231	0.708786	1.2359	1.746	1.17818	1.33398	1.07244
aSA simulation for heating 1,600 steps to 500K, annealing 2,000 steps, and cooling 4,000 steps
2X SA simulation for heating 3,200 steps to 500K, annealing 4,000 steps, and cooling 8,000 steps
4X SA simulation for heating 6,400 steps to 500K, annealing 8,000 steps, and cooling 16,000 steps
6X SA simulation for heating 12,800 steps to 500K, annealing 16,000 steps, and cooling 32,000 steps
8X SA simulation for heating 25,600 steps to 500K, annealing 32,000 steps, and cooling 64,000 steps
1000k SA simulation for heating 1,600 steps to 1000K, annealing 2,000 steps, and cooling 4,000 steps
1000k_2x SA simulation for heating 3,200 steps to 1000K, annealing 4,000 steps, and cooling 8,000 steps
1000k_4x SA simulation for heating 6,400 steps to 1000K, annealing 8,000 steps, and cooling 16,000 steps
