# Supplementary material for: Improving Geometric Validation Metrics and Ensuring Consistency with Experimental Data through TrioSA: An NMR Refinement Protocol
Source: Int J Mol Sci. 2023 Aug 28;24(17):13337. doi: 10.3390/ijms241713337 (PMC10487420; doi:10.3390/ijms241713337)
Supplement: Supplementary file 1 [file ijms-24-13337-s001.zip › Supplementary_file3_The validation assessments of five NMR refinement protocols.xlsx]

## Sheet: Sheet1
Additional File 3: Supplementary Excel Table
The validation assessments of five NMR refinement protocols
The investigation of five NMR refinement protocols of validation assessments for detecting changes in structural quality
Table. The validation assessments of five NMR refinement protocols
Protocols	DOPE_score	Normalized_DOPE	Dfire	Clashscore	RAMA_total	RAMA_Favored	RAMA_perc	RAMA_Allowed	RAMA_OUTLIER	PRO_favoured	PRO_additional	PRO_generously	PRO_disallowed	WHA_1st	WHA_2nd	WHA_Ram	WHA_chi	WHA_Back	WHA_length	WHA_angles	WHA_Omega	WHA_planar	WHA_dih	WHA_Inside
Initial	-7099.04	-0.200569	-144.237	42.2116	84.5825	71.3269	83.6551	10.5847	2.86895	75.9949	19.7591	2.14377	0.88319	-3.29767	-2.59138	-4.16401	-4.7999	-1.45414	0.516446	0.720284	0.391808	0.583454	0.648313	1.05953
SA	-7773.76	-0.891009	-154.875	8.12731	84.6397	73.817	86.3076	7.6949	3.1279	80.2428	14.8347	3.32455	1.59585	-2.56378	-1.50842	-1.68247	-4.3534	-1.65325	0.733734	1.26702	1.83132	1.68862	1.3574	1.14384
SA+GBSW	-7792.81	-0.899004	-161.968	3.38868	85.2391	78.2616	91.2391	5.30956	1.66804	86.4746	10.5543	1.99043	0.978918	-2.7966	-1.68504	-0.0546308	-2.00466	-0.969881	0.697489	1.12526	1.40239	1.15642	1.14355	1.06359
SA+STAP	-7825.94	-0.95081	-158.322	8.63855	84.6411	80.8853	95.1886	2.93794	0.817964	89.6097	8.36591	1.08871	0.934196	-2.41532	-1.27065	1.57832	-0.199567	-1.59151	0.730773	1.2912	1.99059	1.84648	1.43515	1.13813
Refined	-7811.72	-0.935436	-163.979	3.85834	85.1507	82.6259	96.7531	1.9281	0.596697	92.3722	6.08551	0.776415	0.764517	-2.59837	-1.39636	2.83677	2.31149	-1.19191	0.694265	1.14518	1.50552	1.16558	1.1542	1.06156
