# Supplementary material for: Improving Geometric Validation Metrics and Ensuring Consistency with Experimental Data through TrioSA: An NMR Refinement Protocol
Source: Int J Mol Sci. 2023 Aug 28;24(17):13337. doi: 10.3390/ijms241713337 (PMC10487420; doi:10.3390/ijms241713337)
Supplement: Supplementary file 1 [file ijms-24-13337-s001.zip › Supplementary_file4_The results of analysis of distance NOE using five NMR refinement protocols..xlsx]

## Sheet: Sheet1
Additional File 4: Supplementary Excel Table
The results of analysis of distance NOE using five NMR refinement protocols
Table. The distance NOE analysis table for five NMR refinement protocols
Protocols	ALL00_MAXNOEa	ALL00_RMSDb	INTRA00_MAXNOEc	INTRA00_RMSDd	SEQ00_MAXNOEe	SEQ00_RMSDf	MED00_MAXNOEg	MED00_RMSDh	LONG00_MAXNOEi	LONG00_RMSDj
Initial	1.41214	0.120475	0.404758	0.0460282	0.662447	0.0767581	0.881756	0.129429	1.0842	0.168313
SA	0.687194	0.0700027	0.373608	0.0473528	0.482651	0.0665917	0.451378	0.0742896	0.483753	0.0689733
SA+GBSW	0.607265	0.0611803	0.324043	0.0414069	0.417014	0.0576697	0.38716	0.0630774	0.427291	0.0596921
SA+STAP	0.770733	0.0787851	0.383287	0.0477816	0.543161	0.0746841	0.519922	0.0860865	0.555785	0.0821233
Refined	0.712185	0.0716446	0.348779	0.0437199	0.500183	0.0690168	0.467368	0.0771096	0.504807	0.0719084
a The maximum violated distance NOE in all-range
b The average violated distance NOE in all-range
c The maximum violated distance NOE in intra-range
d The average violated distance NOE in intra-range
e The maximum violated distance NOE in sequence-range
f The average violated distance NOE in sequence-range
g The maximum violated distance NOE in medium-range
h The average violated distance NOE in medium-range
i The maximum violated distance NOE in long-range
j The average violated distance NOE in long-range
