# Supplementary material for: Improving Geometric Validation Metrics and Ensuring Consistency with Experimental Data through TrioSA: An NMR Refinement Protocol
Source: Int J Mol Sci. 2023 Aug 28;24(17):13337. doi: 10.3390/ijms241713337 (PMC10487420; doi:10.3390/ijms241713337)
Supplement: Supplementary file 1 [file ijms-24-13337-s001.zip › Supplementary_file5_Refined_NMR_PDB_ID.xlsx]

## Sheet: Sheet1
Additional File 5: Supplementary Excel Table
Refinement of 3752 NMR PDB IDs Using the TrioSA NMR Refinement Protocol
Table. Refinement of 3752 NMR PDB IDs Using the TrioSA NMR Refinement Protocol
PDB id	Entitiy id
1A2I	1
1A57	1
1A5E	1
1A5J	1
1A7F	1
1A7F_2	2
1AB3	1
1AB7	1
1ADX	1
1ADZ	1
1AF8	1
1AFJ	1
1AFP	1
1AH9	1
1AHL	1
1AI0	1
1AI0_2	2
1AIY	1
1AIY_2	2
1AJW	1
1AJY	1
1AK8	1
1ALG	1
1AO8	1
1AP4	1
1AP8	1
1APF	1
1AQ5	1
1AWW	1
1AXH	1
1AYJ	1
1AYK	1
1AZJ	1
1B1V	1
1B22	1
1B28	1
1B3C	1
1B4C	1
1B9Q	1
1B9U	1
1BA4	1
1BA5	1
1BA6	1
1BAL	1
1BC4	1
1BC6	1
1BCN	1
1BCT	1
1BEG	1
1BEI	1
1BF8	1
1BFY	1
1BGK	1
1BH1	1
1BH4	1
1BHI	1
1BJB	1
1BJC	1
1BKU	1
1BLJ	1
1BLQ	1
1BLR	1
1BM5	1
1BM6	1
1BMR	1
1BNB	1
1BQZ	1
1BSH	1
1BUQ	1
1BVE	1
1BWX	1
1BXD	1
1BY0	1
1BYM	1
1BZF	1
1BZG	1
1BZK	1
1C06	1
1C2U	1
1C49	1
1C6S	1
1CB9	1
1CE3	1
1CEJ	1
1CFE	1
1CKW	1
1CKX	1
1CKY	1
1CLD	1
1CMF	1
1CMG	1
1CN2	1
1CN7	1
1CQU	1
1CRP	1
1CW5	1
1CW6	1
1CX1	1
1CXR	1
1CZ5	1
1D0R	1
1D1H	1
1D1N	1
1D1R	1
1D2B	1
1D2J	1
1D2L	1
1D5V	1
1D8J	1
1D9J	1
1D9O	1
1D9P	1
1DBY	1
1DC2	1
1DCJ	1
1DE3	1
1DFD	1
1DIU	1
1DJM	1
1DKC	1
1DL0	1
1DMF	1
1DMO	1
1DO9	1
1DQB	1
1DSK	1
1DSQ	1
1DSV	1
1DU2	1
1DU9	1
1DUM	1
1DVV	1
1DW5	1
1DX8	1
1E0G	1
1E4U	1
1E8L	1
1E9T	1
1ECI	1
1EFE	1
1EGX	1
1EIH	1
1EIT	1
1EJQ	1
1EPH	1
1EQ0	1
1ERY	1
1EXE	1
1EZO	1
1EZP	1
1F04	1
1F0Z	1
1F22	1
1F2G	1
1F3C	1
1F3Y	1
1F43	1
1F5Y	1
1F7E	1
1F8P	1
1F8Z	1
1F96	1
1FAF	1
1FCL	1
1FDM	1
1FEX	1
1FF7	1
1FGP	1
1FH3	1
1FI5	1
1FJD	1
1FME	1
1FPW	1
1FQQ	1
1FR0	1
1FSD	1
1FU9	1
1FV5	1
1FVN	1
1FWO	1
1G25	1
1G26	1
1G2T	1
1G47	1
1G6J	1
1G6M	1
1G91	1
1G9E	1
1G9L	1
1G9P	1
1GB1	1
1GB4	1
1GBR	1
1GD5	1
1GE9	1
1GEA	1
1GGW	1
1GH1	1
1GH9	1
1GHK	1
1GHU	1
1GJS	1
1GPX	1
1GXE	1
1GYZ	1
1H0T	1
1H0Z	1
1H2O	1
1H3Z	1
1H4B	1
1HA6	1
1HA8	1
1HDL	1
1HI7	1
1HIQ	1
1HIQ_2	2
1HIS	1
1HIS_2	2
1HNS	1
1HOV	1
1HP2	1
1HP3	1
1HPW	1
1HPY	1
1HS7	1
1HSN	1
1HUE	1
1HVW	1
1HX2	1
1HZK	1
1HZL	1
1I25	1
1I2U	1
1I2V	1
1I42	1
1I6C	1
1I6G	1
1IBI	1
1ICY	1
1IDH	1
1IDL	1
1IE6	1
1IEN	1
1IEZ	1
1IFW	1
1IG6	1
1IGL	1
1IH0	1
1IHQ	1
1IK0	1
1IKU	1
1IOX	1
1IP9	1
1IRH	1
1IRY	1
1IRZ	1
1ITF	1
1ITY	1
1IVA	1
1IVM	1
1IW4	1
1IWC	1
1IWF	1
1IY5	1
1IY6	1
1IYC	1
1IYM	1
1IYY	1
1J03	1
1J0Q	1
1J3C	1
1J3D	1
1J3S	1
1J3X	1
1J5I	1
1J6Y	1
1J7M	1
1J7Q	1
1J8C	1
1J8K	1
1J9I	1
1JAS	1
1JC2	1
1JC6	1
1JCU	1
1JE3	1
1JE9	1
1JEM	1
1JFN	1
1JGK	1
1JI8	1
1JJG	1
1JKN	1
1JKZ	1
1JLZ	1
1JMN	1
1JMP	1
1JN7	1
1JNJ	1
1JNS	1
1JO5	1
1JO6	1
1JOQ	1
1JOR	1
1JRF	1
1JRJ	1
1JSA	1
1JV8	1
1JW2	1
1JW3	1
1JWE	1
1JYT	1
1K0P	1
1K0T	1
1K1V	1
1K2H	1
1K3M	1
1K42	1
1K5W	1
1K8B	1
1K8V	1
1K91	1
1K9C	1
1K9Q	1
1K9R	1
1KC4	1
1KC4_2	2
1KDX	1
1KDX_2	2
1KGM	1
1KIO	1
1KJ0	1
1KMD	1
1KMF_2	2
1KOZ	1
1KQH	1
1KQI	1
1KRW	1
1KRX	1
1KUN	1
1KV4	1
1KVI	1
1KVJ	1
1KZV	1
1L1I	1
1L2Y	1
1L3E_2	2
1L3G	1
1L3H	1
1L3O	1
1L3X	1
1L3Y	1
1L6N	1
1L7B	1
1L7Y	1
1L8C	1
1L8C_2	2
1LA4	1
1LC2	1
1LD6	1
1LFC	1
1LIQ	1
1LJZ_2	2
1LKJ	1
1LKQ	1
1LV3	1
1M2F	1
1M30	1
1M5Z	1
1MB6	1
1MBK	1
1MEK	1
1MFS	1
1MG8	1
1MK3	1
1MMC	1
1MNL	1
1MOT	1
1MPZ	1
1MUT	1
1MV4	1
1MYO	1
1MZK	1
1N4I	1
1N4N	1
1N7T	1
1N88	1
1NAU	1
1NBL	1
1NCS	1
1ND9	1
1NE3	1
1NE5	1
1NEE	1
1NER	1
1NEW	1
1NFA	1
1NI7	1
1NIN	1
1NIX	1
1NIY	1
1NJ3	1
1NMV	1
1NMW	1
1NOR	1
1NTC	1
1NTI	1
1NVL	1
1NWD	1
1NWD_2	2
1NWV	1
1NY9	1
1NYA	1
1NYN	1
1NYP	1
1O78	1
1O8R	1
1O8T	1
1OCA	1
1OCP	1
1OHM	1
1OHN	1
1OJG	1
1OM2	1
1OQ3	1
1OQA	1
1OQP	1
1ORX	1
1OVQ	1
1OZI	1
1OZS	1
1OZS_2	2
1P0G	1
1P0J	1
1P0L	1
1P0O	1
1P1D	1
1P1E	1
1P4Q	1
1P5K	1
1P5L	1
1P68	1
1P88	1
1P89	1
1P9K	1
1P9Z	1
1PBU	1
1PD7_2	2
1PDX	1
1PFD	1
1PFJ	1
1PFM	1
1PJV	1
1PJW	1
1PLO	1
1PMC	1
1POQ	1
1POZ	1
1PQN	1
1PQX	1
1PRV	1
1PSM	1
1PSY	1
1PT4	1
1PUZ	1
1PXE	1
1PYC	1
1Q10	1
1Q27	1
1Q2F	1
1Q2I	1
1Q2J	1
1Q2K	1
1Q2N	1
1Q2Z	1
1Q48	1
1Q60	1
1Q71	1
1Q7I	1
1Q7J	1
1Q8G	1
1Q8L	1
1Q8X	1
1Q9P	1
1QDP	1
1QFD	1
1QHK	1
1QK6	1
1QK7	1
1QKH	1
1QNK	1
1QP6	1
1QQV	1
1QU5	1
1QVP	1
1QWV	1
1QZP	1
1R1F	1
1R21	1
1R2A	1
1R2U	1
1R48	1
1R4T	1
1R4Y	1
1R57	1
1R5S	1
1R63	1
1R6P	1
1R73	1
1R7D	1
1R7F	1
1R8U	1
1R8U_2	2
1R9P	1
1RF8	1
1RF8_2	2
1RGW	1
1RHW	1
1RHX	1
1RI9	1
1RIM	1
1RJI	1
1RJJ	1
1RKN	1
1RL5	1
1RON	1
1ROO	1
1RPR	1
1RQ6	1
1RQ8	1
1RSO_2	2
1RTN	1
1RW2	1
1RW5	1
1RYG	1
1RYJ	1
1RYV	1
1RZS	1
1S04	1
1S1N	1
1S3A	1
1S6O	1
1S6U	1
1S6W	1
1SB0_2	2
1SBJ	1
1SCV	1
1SF1	1
1SF1_2	2
1SG7	1
1SHI	1
1SIY	1
1SJG	1
1SKH	1
1SKT	1
1SMG	1
1SMZ	1
1SOP	1
1SOU	1
1SOY	1
1SP7	1
1SPK	1
1SPY	1
1SQR	1
1SR3	1
1SRB	1
1SRZ	1
1SS1	1
1SS2	1
1SSE	1
1SSL	1
1SSU	1
1ST7	1
1SV1	1
1SV1_2	2
1SXE	1
1SY9	1
1SY9_2	2
1SYM	1
1SZL	1
1SZV	1
1T0G	1
1T17	1
1T1H	1
1T1K_2	2
1T1P_2	2
1T1Q_2	2
1T1T	1
1T3K	1
1T3V	1
1T5Q	1
1T6W	1
1TAC	1
1TBC	1
1TDP	1
1TFS	1
1TI3	1
1TIH	1
1TIZ	1
1TLE	1
1TM9	1
1TNQ	1
1TNW	1
1TOF	1
1TP4	1
1TQZ	1
1TR4	1
1TTE	1
1TTV	1
1TUM	1
1TVC	1
1U0P	1
1U37	1
1U38	1
1U39	1
1U3M	1
1U57	1
1U5L	1
1U5M	1
1U7Q	1
1UCV	1
1UDK	1
1UDL	1
1UE9	1
1UFM	1
1UFW	1
1UFX	1
1UFZ	1
1UG0	1
1UGJ	1
1UGK	1
1UGL	1
1UGO	1
1UHC	1
1UHF	1
1UHP	1
1UHT	1
1UHU	1
1UHZ	1
1UIT	1
1UJD	1
1UJL	1
1UJO	1
1UJR	1
1UJX	1
1UJY	1
1UM7	1
1UW0	1
1UWD	1
1UZC	1
1V1D	1
1V27	1
1V28	1
1V5J	1
1V5K	1
1V5L	1
1V5Q	1
1V5S	1
1V63	1
1V6R	1
1V86	1
1V9J	1
1V9V	1
1V9W	1
1V9X	1
1VA2	1
1VA3	1
1VA8	1
1VAZ	1
1VB8	1
1VCS	1
1VD4	1
1VDL	1
1VEG	1
1VEH	1
1VEJ	1
1VEK	1
1VF9	1
1VFI	1
1VG5	1
1VJ6	1
1VTP	1
1VTX	1
1VYX	1
1W09	1
1W0A	1
1W0B	1
1W2Q	1
1W3D	1
1W4E	1
1W4F	1
1W4G	1
1W4H	1
1W4I	1
1W4J	1
1W4K	1
1W9R	1
1WA8	1
1WA8_2	2
1WCN	1
1WE6	1
1WE7	1
1WE9	1
1WEM	1
1WEN	1
1WEO	1
1WEP	1
1WEQ	1
1WES	1
1WEW	1
1WEX	1
1WF5	1
1WF6	1
1WF7	1
1WF8	1
1WF9	1
1WFE	1
1WFF	1
1WFG	1
1WFH	1
1WFI	1
1WFJ	1
1WFK	1
1WFL	1
1WFM	1
1WFN	1
1WFO	1
1WFP	1
1WFT	1
1WFU	1
1WFV	1
1WFW	1
1WG4	1
1WGU	1
1WGX	1
1WGY	1
1WH3	1
1WI5	1
1WI6	1
1WI9	1
1WIA	1
1WIF	1
1WIG	1
1WIH	1
1WII	1
1WIV	1
1WIX	1
1WJ0	1
1WJ1	1
1WJ2	1
1WJ6	1
1WJ7	1
1WJB	1
1WJD	1
1WJJ	1
1WJK	1
1WJL	1
1WJM	1
1WJN	1
1WJO	1
1WJP	1
1WJQ	1
1WJR	1
1WJS	1
1WKI	1
1WKT	1
1WMT	1
1WO3	1
1WO4	1
1WO5	1
1WOT	1
1WPD	1
1WQB	1
1WR4	1
1WRG	1
1WSO	1
1WT7	1
1WT8	1
1WUZ	1
1WVO	1
1WXL	1
1WXN	1
1WXP	1
1WXV	1
1WYH	1
1WYJ	1
1WYL	1
1WYM	1
1WYN	1
1WYO	1
1WYP	1
1WYQ	1
1WYR	1
1WYS	1
1X22	1
1X32	1
1X3P	1
1X3Q	1
1X43	1
1X44	1
1X45	1
1X47	1
1X48	1
1X49	1
1X4A	1
1X4B	1
1X4C	1
1X4D	1
1X4E	1
1X4F	1
1X4G	1
1X4H	1
1X4I	1
1X4J	1
1X4K	1
1X4L	1
1X4M	1
1X4N	1
1X4O	1
1X4P	1
1X4Q	1
1X4S	1
1X4U	1
1X4V	1
1X4W	1
1X4X	1
1X4Y	1
1X4Z	1
1X50	1
1X51	1
1X5A	1
1X5B	1
1X5C	1
1X5D	1
1X5E	1
1X5F	1
1X5G	1
1X5H	1
1X5I	1
1X5J	1
1X5K	1
1X5L	1
1X5N	1
1X5O	1
1X5Q	1
1X5R	1
1X60	1
1X61	1
1X63	1
1X64	1
1X65	1
1X69	1
1X6B	1
1X6C	1
1X6D	1
1X6E	1
1X6F	1
1X6G	1
1X6H	1
1X9V	1
1XC0	1
1XFE	1
1XFR	1
1XHH	1
1XHS	1
1XJ1	1
1XKM	1
1XKM_2	2
1XMW	1
1XOO	1
1XOY	1
1XPN	1
1XPW	1
1XSA	1
1XSB	1
1XUT	1
1XWH	1
1Y1C	1
1Y29	1
1Y2P	1
1Y2Y	1
1Y32	1
1Y4E	1
1Y4O	1
1Y5O	1
1Y74	1
1Y74_2	2
1Y76	1
1Y76_2	2
1Y7N	1
1Y7X	1
1Y8B	1
1Y8M	1
1Y9J	1
1YCM	1
1YDU	1
1YEZ	1
1YH5	1
1YJJ	1
1YJR	1
1YJT	1
1YJU	1
1YJV	1
1YNX	1
1YOP	1
1YSF	1
1YSM	1
1YSY	1
1YUS	1
1YVC	1
1YWL	1
1YWS	1
1YWU	1
1YWW	1
1YX3	1
1YYB	1
1YYC	1
1YZA	1
1YZC	1
1Z09	1
1Z2K	1
1Z2Q	1
1Z2T	1
1Z3K	1
1Z5F	1
1Z60	1
1Z65	1
1Z6C	1
1Z86	1
1Z8R	1
1Z99	1
1Z9E	1
1Z9I	1
1Z9Q	1
1ZA8	1
1ZAQ	1
1ZDV	1
1ZFU	1
1ZHC	1
1ZIT	1
1ZJQ	1
1ZK6	1
1ZLL	1
1ZMZ	1
1ZO0	1
1ZPX	1
1ZR7	1
1ZRJ	1
1ZRY	1
1ZTR	1
1ZU2	1
1ZUB	1
1ZUE	1
1ZUF	1
1ZUV	1
1ZV6	1
1ZW7	1
1ZW8	1
1ZWM	1
1ZWO	1
1ZWU	1
1ZXH	1
1ZZA	1
1ZZV	1
2A20	1
2A2V	1
2A36	1
2A37	1
2A3S	1
2A4J	1
2A51	1
2A5M	1
2A7Y	1
2AAP	1
2AB9	1
2AE9	1
2AFD	1
2AFJ	1
2AGA	1
2AGH_2	2
2AGM	1
2AHQ	1
2AI5	1
2AIH	1
2AIV	1
2AJW	1
2AK0	1
2AKK	1
2AL3	1
2AMI	1
2AMN	1
2AN7	1
2AP7	1
2AP8	1
2APN	1
2AQC	1
2AQE	1
2ARI	1
2AUV	1
2AWT	1
2AXL	1
2AYA	1
2AYJ	1
2AYX	1
2AYY	1
2AYZ	1
2B19	1
2B1U	1
2B1W	1
2B38	1
2B3A	1
2B3W	1
2B4N	1
2B5B	1
2B5K	1
2B68	1
2B88	1
2B89	1
2B8A	1
2BAF	1
2BBG	1
2BBL	1
2BBP	1
2BBU	1
2BL6	1
2BTG	1
2BTH	1
2BYE	1
2BYF	1
2BZ2	1
2C52_2	2
2C6A	1
2C6B	1
2C7H	1
2CO8	1
2COE	1
2COK	1
2COM	1
2COP	1
2COR	1
2COS	1
2COT	1
2CP9	1
2CPB	1
2CPC	1
2CPD	1
2CPE	1
2CPF	1
2CPI	1
2CPJ	1
2CPM	1
2CPN	1
2CPQ	1
2CPR	1
2CPS	1
2CPW	1
2CQ7	1
2CQ8	1
2CQA	1
2CQB	1
2CQC	1
2CQE	1
2CQF	1
2CQG	1
2CQH	1
2CQI	1
2CQK	1
2CQL	1
2CQM	1
2CQN	1
2CQO	1
2CQP	1
2CQQ	1
2CQR	1
2CQU	1
2CQW	1
2CQX	1
2CR6	1
2CR9	1
2CRE	1
2CRG	1
2CRQ	1
2CRV	1
2CS2	1
2CTD	1
2CTE	1
2CTF	1
2CTJ	1
2CTK	1
2CTL	1
2CTM	1
2CTO	1
2CUM	1
2CUP	1
2CUQ	1
2CUR	1
2CVR	1
2CW1	1
2CZN	1
2CZY	1
2D1U	1
2D2P	1
2D2W	1
2D3J	1
2D7L	1
2D7M	1
2D7N	1
2D7O	1
2D7P	1
2D7Q	1
2D85	1
2D86	1
2D87	1
2D88	1
2D89	1
2D8H	1
2D8I	1
2D8J	1
2D8X	1
2D8Y	1
2D8Z	1
2D90	1
2D96	1
2D9B	1
2D9F	1
2DAQ	1
2DAR	1
2DAS	1
2DAV	1
2DB6	1
2DB8	1
2DBA	1
2DBJ	1
2DBK	1
2DBM	1
2DCI	1
2DCO	1
2DCV	1
2DCW	1
2DDI	1
2DDJ	1
2DDL	1
2DDY	1
2DEZ	1
2DF0	1
2DI7	1
2DI8	1
2DI9	1
2DIA	1
2DIB	1
2DIC	1
2DID	1
2DIF	1
2DIP	1
2DIS	1
2DIT	1
2DIU	1
2DIV	1
2DIX	1
2DIY	1
2DIZ	1
2DJ0	1
2DJ1	1
2DJ2	1
2DJ4	1
2DJ7	1
2DJ8	1
2DJM	1
2DJR	1
2DJT	1
2DJV	1
2DK1	1
2DK2	1
2DK3	1
2DK4	1
2DK5	1
2DK7	1
2DK8	1
2DKM	1
2DKZ	1
2DL0	1
2DL3	1
2DL4	1
2DL5	1
2DL7	1
2DL8	1
2DLG	1
2DLO	1
2DLP	1
2DM0	1
2DM1	1
2DM2	1
2DM3	1
2DM7	1
2DMB	1
2DMC	1
2DMI	1
2DMK	1
2DML	1
2DMM	1
2DMN	1
2DMY	1
2DN5	1
2DNU	1
2DNW	1
2DNX	1
2DO0	1
2DO1	1
2DO3	1
2DO4	1
2DO5	1
2DO7	1
2DOD	1
2DOE	1
2DOF	1
2DQ5	1
2DS4	1
2DSM	1
2DT6	1
2DT7	1
2DT7_2	2
2DYF	1
2E1O	1
2E2F	1
2E2S	1
2E2W	1
2E30_2	2
2E4H	1
2E4H_2	2
2E4J	1
2E5E	1
2E5O	1
2E5P	1
2E5Q	1
2E5R	1
2E5S	1
2E5Z	1
2E6N	1
2E6O	1
2E6R	1
2E7K	1
2E8M	1
2E8O	1
2E9G	1
2E9H	1
2E9I	1
2E9J	1
2E9K	1
2EAO	1
2EBT	1
2EBU	1
2EC7	1
2ECD	1
2ECT	1
2ECV	1
2ECW	1
2ECZ	1
2ED0	1
2ED1	1
2ED8	1
2EDB	1
2EDD	1
2EDE	1
2EDF	1
2EDG	1
2EDL	1
2EDN	1
2EDO	1
2EDP	1
2EDU	1
2EDX	1
2EDZ	1
2EE0	1
2EE1	1
2EE2	1
2EE4	1
2EE5	1
2EE6	1
2EE7	1
2EE8	1
2EE9	1
2EEA	1
2EEB	1
2EEC	1
2EED	1
2EEE	1
2EEF	1
2EEG	1
2EEH	1
2EEJ	1
2EEM	1
2EJ4	1
2EJM	1
2EJS	1
2EJY	1
2EKH	1
2EKI	1
2EKJ	1
2EKK	1
2EKX	1
2ELH	1
2ELI	1
2ELK	1
2ELL	1
2EMI	1
2EMJ	1
2EMK	1
2EML	1
2EMM	1
2EMP	1
2EMV	1
2EMW	1
2EMX	1
2EMY	1
2EMZ	1
2EN0	1
2EN1	1
2EN2	1
2EN3	1
2EN4	1
2EN6	1
2EN7	1
2EN8	1
2EN9	1
2ENA	1
2ENC	1
2ENE	1
2ENF	1
2ENH	1
2ENJ	1
2ENM	1
2ENN	1
2ENO	1
2ENT	1
2ENV	1
2ENY	1
2ENZ	1
2EO1	1
2EO9	1
2EOC	1
2EOE	1
2EOF	1
2EOG	1
2EOH	1
2EOI	1
2EOJ	1
2EOK	1
2EOL	1
2EOM	1
2EON	1
2EOO	1
2EOP	1
2EOQ	1
2EOR	1
2EOS	1
2EOU	1
2EOV	1
2EOW	1
2EOX	1
2EOY	1
2EOZ	1
2EP0	1
2EP1	1
2EP2	1
2EP3	1
2EP4	1
2EPU	1
2EQI	1
2EQJ	1
2EQK	1
2EQM	1
2EQN	1
2EQP	1
2EQZ	1
2ERI	1
2ETT	1
2EXN	1
2EZL	1
2EZW	1
2EZY	1
2F09	1
2F2I	1
2F2J	1
2F3V	1
2F3W	1
2FC6	1
2FC7	1
2FC8	1
2FC9	1
2FCE	1
2FE0	1
2FFT	1
2FH0	1
2FJL	1
2FKX	1
2FLG	1
2FLY	1
2FM4	1
2FN2	1
2FQ0	1
2FQ2	1
2FQA	1
2FQC	1
2FRW	1
2FRY	1
2FUH_2	2
2FVT	1
2FWU	1
2FYJ	1
2FZ0	1
2G1D	1
2G2B	1
2G35	1
2G46	1
2G4A	1
2G7H	1
2G7J	1
2G9O	1
2G9P	1
2GA7	1
2GBS	1
2GD3	1
2GD7	1
2GDA	1
2GDT	1
2GE9	1
2GGP	1
2GJ0	1
2GJF	1
2GJH	1
2GJI	1
2GL1	1
2GM2	1
2GO0	1
2GO9	1
2GOW	1
2GPF	1
2GPQ	1
2GRI	1
2GS0	1
2GTJ	1
2GTO	1
2GUT	1
2GW6	1
2GWP	1
2GX1	1
2H1Z	1
2H3F	1
2H3I	1
2H3Q	1
2H3V	1
2H3Z	1
2H45	1
2H5M	1
2H7B	1
2H9Z	1
2HBP	1
2HCC	1
2HDL	1
2HEP	1
2HEQ	1
2HFI	1
2HFQ	1
2HFR	1
2HFV	1
2HGA	1
2HGC	1
2HGL	1
2HGM	1
2HGO	1
2HHI	1
2HI6	1
2HID	1
2HJ8	1
2HJQ	1
2HKY	1
2HLW	1
2HM3	1
2HM4	1
2HM5	1
2HM6	1
2HM9	1
2HN8	1
2HQP	1
2HR9	1
2HST	1
2HSY	1
2HVA	1
2HW0	1
2HWT	1
2HX6	1
2HZD	1
2I1T	1
2I2J	1
2I38	1
2I4K	1
2I8N	1
2I94_2	2
2I9H	1
2I9N	1
2I9O	1
2IDA	1
2IEM	1
2IF1	1
2IGG	1
2IGH	1
2ILX	1
2IMU	1
2IN2	1
2IT7	1
2IT8	1
2ITA	1
2IWJ	1
2J0Z	1
2J11	1
2J48	1
2J5O	1
2J8P	1
2JM0	1
2JM1	1
2JM2	1
2JM4	1
2JM6	1
2JMB	1
2JMH	1
2JML	1
2JMN_2	2
2JMP	1
2JMR	1
2JMS	1
2JMU	1
2JMX	1
2JMX_2	2
2JMZ	1
2JN0	1
2JN3	1
2JN8	1
2JN9	1
2JNA	1
2JNE	1
2JNH	1
2JNJ	1
2JNK	1
2JNY	1
2JNZ	1
2JO6	1
2JO8	1
2JOA	1
2JOB	1
2JOE	1
2JOF	1
2JOO	1
2JOP	1
2JOR	1
2JOS	1
2JOW	1
2JOX	1
2JP0	1
2JP7	1
2JPI	1
2JPJ	1
2JPK	1
2JPL	1
2JPM	1
2JPN	1
2JPQ	1
2JPS	1
2JPT	1
2JPY	1
2JQ1	1
2JQ3	1
2JQ8	1
2JQA	1
2JQJ	1
2JQL	1
2JQN	1
2JQO	1
2JQP	1
2JQT	1
2JR1	1
2JR2	1
2JR3	1
2JR5	1
2JR6	1
2JR8	1
2JRF	1
2JRH	1
2JRJ	1
2JRM	1
2JRO	1
2JRR	1
2JRS	1
2JRT	1
2JRW	1
2JS0	1
2JS2	1
2JS4	1
2JS7	1
2JSD	1
2JSF	1
2JSO	1
2JSS_2	2
2JST	1
2JT0	1
2JT1	1
2JT2	1
2JT3	1
2JT8	1
2JTB	1
2JTE	1
2JTM	1
2JTO	1
2JTT	1
2JTT_2	2
2JTV	1
2JTW	1
2JTX	1
2JTY	1
2JTZ	1
2JU0_2	2
2JU4	1
2JU5	1
2JUA	1
2JUM_2	2
2JUV_2	2
2JUW	1
2JUZ	1
2JV1_2	2
2JV2	1
2JV4	1
2JV6	1
2JV9	1
2JVB	1
2JVC	1
2JVD	1
2JVF	1
2JVM	1
2JVN	1
2JVO	1
2JVR	1
2JVW	1
2JW8	1
2JWN	1
2JWO	1
2JWT	1
2JWU	1
2JWY	1
2JX3	1
2JX6	1
2JXB	1
2JXD	1
2JXF	1
2JXJ	1
2JXL	1
2JXN	1
2JXP	1
2JXT	1
2JXU	1
2JY0	1
2JYB	1
2JYD	1
2JYT	1
2JYY	1
2JZ0	1
2JZ1	1
2JZ2	1
2JZ3	1
2JZ6	1
2JZ7	1
2JZ8	1
2JZA	1
2JZI_2	2
2JZM	1
2JZQ	1
2JZR	1
2JZX	1
2K03	1
2K04	1
2K04_2	2
2K05	1
2K06	1
2K0E	1
2K0F	1
2K0L	1
2K0M	1
2K0R	1
2K10	1
2K11	1
2K16	1
2K18	1
2K19	1
2K1A	1
2K1D	1
2K1G	1
2K1H	1
2K1I	1
2K1O	1
2K1S	1
2K1Z	1
2K20	1
2K27	1
2K28	1
2K2B	1
2K2D	1
2K2E	1
2K2G	1
2K2I	1
2K2J	1
2K2M	1
2K2P	1
2K2R	1
2K2U	1
2K2U_2	2
2K2X	1
2K2Y	1
2K32	1
2K3A	1
2K3D	1
2K3F	1
2K3G	1
2K3I	1
2K3U	1
2K3X	1
2K43	1
2K44	1
2K47	1
2K48	1
2K49	1
2K4B	1
2K4D	1
2K4E	1
2K4F	1
2K4H	1
2K4I	1
2K4M	1
2K4N	1
2K4R	1
2K4W	1
2K4X	1
2K4Y	1
2K4Z	1
2K50	1
2K52	1
2K53	1
2K56	1
2K57	1
2K5D	1
2K5E	1
2K5I	1
2K5J	1
2K5K	1
2K5N	1
2K5Q	1
2K5R	1
2K5S	1
2K5T	1
2K5U	1
2K5V	1
2K5W	1
2K6B	1
2K6L	1
2K6P	1
2K6S	1
2K6X	1
2K6Z	1
2K70	1
2K72	1
2K73	1
2K74	1
2K75	1
2K76	1
2K7A	1
2K7A_2	2
2K7B	1
2K7C	1
2K7D	1
2K7H	1
2K7Y	1
2K87	1
2K8F_2	2
2K8H	1
2K8O	1
2K8S	1
2K93	1
2K94	1
2K98	1
2K9B	1
2K9C	1
2K9H	1
2K9I	1
2K9N	1
2K9O	1
2K9Q	1
2K9R	1
2K9U_2	2
2K9X	1
2K9Z	1
2KA0	1
2KA1	1
2KA2	1
2KA4_2	2
2KA5	1
2KA6_2	2
2KA7	1
2KA9	1
2KAC	1
2KAK	1
2KAN	1
2KB3	1
2KB4	1
2KB8	1
2KB9	1
2KBE	1
2KBF	1
2KBG	1
2KBL	1
2KBN	1
2KBO	1
2KBQ	1
2KBR	1
2KBT	1
2KC2	1
2KC3	1
2KC6	1
2KCA	1
2KCD	1
2KCF	1
2KCG	1
2KCH	1
2KCJ	1
2KCL	1
2KCM	1
2KCN	1
2KCP	1
2KCQ	1
2KCT	1
2KCU	1
2KCV	1
2KCW	1
2KCY	1
2KD0	1
2KD1	1
2KD3	1
2KD7	1
2KDC	1
2KDM	1
2KDN	1
2KDO	1
2KDU	1
2KDU_2	2
2KDY	1
2KE3	1
2KEC	1
2KED	1
2KEF	1
2KEG	1
2KEH	1
2KEN	1
2KEQ	1
2KES	1
2KET	1
2KEY	1
2KF2	1
2KFE	1
2KFG	1
2KFH	1
2KFP	1
2KFQ	1
2KG4	1
2KGG	1
2KGH	1
2KGI	1
2KGL	1
2KGN	1
2KGO	1
2KGQ	1
2KGR	1
2KGW	1
2KHA	1
2KHB	1
2KHD	1
2KHE	1
2KHF	1
2KHG	1
2KHL	1
2KHM	1
2KHR	1
2KHS	1
2KHS_2	2
2KHV	1
2KHZ	1
2KI2	1
2KI9	1
2KIA	1
2KIE	1
2KIF	1
2KIG	1
2KIH	1
2KII	1
2KIL	1
2KIM	1
2KIO	1
2KIR	1
2KIU	1
2KIV	1
2KIW	1
2KIX	1
2KJ1	1
2KJ4	1
2KJ4_2	2
2KJ5	1
2KJ7	1
2KJ8	1
2KJ9	1
2KJI	1
2KJK	1
2KJN	1
2KJO	1
2KJP	1
2KJQ	1
2KJR	1
2KJV	1
2KJW	1
2KJX	1
2KJY	1
2KK0	1
2KK1	1
2KK2	1
2KK8	1
2KKE	1
2KKG	1
2KKH	1
2KKL	1
2KKN	1
2KKO	1
2KKP	1
2KKQ	1
2KKS	1
2KKT	1
2KKU	1
2KKX	1
2KKY	1
2KKZ	1
2KL2	1
2KL4	1
2KL6	1
2KL7	1
2KL8	1
2KLD	1
2KLH	1
2KLM	1
2KLU	1
2KLW	1
2KLY	1
2KLZ	1
2KM0	1
2KM2	1
2KM9	1
2KMG	1
2KMI	1
2KMM	1
2KMQ	1
2KMR	1
2KMT	1
2KMZ	1
2KN1	1
2KN2	1
2KN8	1
2KN9	1
2KNA	1
2KNB	1
2KNC	1
2KND	1
2KNE	1
2KNM	1
2KNN	1
2KNP	1
2KNS	1
2KO1	1
2KO3	1
2KO7	1
2KOE	1
2KOJ	1
2KOL	1
2KON	1
2KOY	1
2KOZ	1
2KP0	1
2KP2	1
2KP5	1
2KPA	1
2KPI	1
2KPJ	1
2KPK	1
2KPL	1
2KPM	1
[truncated: 1,756 more rows]
