# Supplementary material for: Improving Geometric Validation Metrics and Ensuring Consistency with Experimental Data through TrioSA: An NMR Refinement Protocol
Source: Int J Mol Sci. 2023 Aug 28;24(17):13337. doi: 10.3390/ijms241713337 (PMC10487420; doi:10.3390/ijms241713337)
Supplement: Supplementary file 1 [file ijms-24-13337-s001.zip › Supplementary_file6_RECOORD.xlsx]

## Sheet: RECOORD vs TrioSA
Table. Comparative analysis of structural quality metrics before and after refinement using TrioSA and RECOORD database.
	nDOPE		Clashscore		Ramachandra score		Rotamer normality
	Mean	SD	Mean	SD	Mean	SD	Mean	SD
Initial	-0.20196	1.0115	74.1352	61.8698	77.0572	12.218	-6.21004	1.92489
TrioSA	-0.93544	1.08249	3.09434	3.00313	95.889	3.80571	2.23542	1.72961
CNS	-0.39663	0.925184	21.3602	15.8544	79.3239	9.92867	-2.34783	1.58097
CNW	-0.92756	0.910283	15.4974	7.42119	81.7203	7.53898	-2.48555	1.10719
CYA	-0.17475	0.943139	59.8911	32.929	69.0785	11.2217	-7.26888	0.543936
CYW	-0.93213	0.910465	15.8031	7.3768	81.0814	7.50587	-2.77973	1.09849

## Sheet: ANOVA
Table. Results of ANOVA analysis comparing the validation scores of CNS, CNW, CYA, CYW, and TrioSA refinement protocols
Valiation assessment	F	P-value	F critical
nDOPE	46.4673	1.72758e-36	2.37891
Clashscore	411.035	1.65683e-227	2.37891
Rama	332.809	3.69702e-196	2.37891
Rotamer normality	1762.21	0	2.37891
Table. Results of ANOVA analysis comparing the validation scores of CNW, CYW, and TrioSA refinement protocols.
Valiation scoreValiation assessment	F	P-value	F critical
nDOPE	2.02279	0.132993	3.00749
Clashscore	340.7	1.54965e-106	3.00749
RAMA	421.551	3.85022e-124	3.00749
Rotamer normality	1121.53	3.59526e-228	3.00749

## Sheet: CNS
CNS	DOPE	nDOPE	dDFIRE	CLAS	RAMA	PRORAMA	1st	2nd	RAMA	rotamer	backbone
1A57	-8236.91	0.2992	-152.895	22.6332	61.8944	44.388	-5.0444	-3.9044	-6.8408	-2.3352	-1.7764
1A5J	-8508.34	-0.404	-179.571	18.0892	74.964	65.672	-4.1732	-3.3832	-5.7716	-2.8408	-2.0384
1AB7	-10014.3	-2.0948	-197.182	15.362	83.818	77.9	-1.394	-2.206	-4.7968	-1.6256	-0.3204
1AF8	-6896.48	-0.2976	-143.742	11.34	82.5704	77.656	-3.3684	-3.2012	-5.156	-3.0032	-1.2332
1AH9	-5673.72	-0.7152	-99.0024	50.95	69.392	54.06	-3.9308	-2.8	-6.676	-4.7168	-1.5748
1AHL	-3315.14	-0.7284	-63.0216	18.8884	84.51	69.328	-6.0664	-4.408	-5.0876	-4.8772	-1.5844
1AJW	-14044.4	-1.1296	-265.805	17.4252	80.5032	69.26	-2.2612	-2.8692	-5.4896	-2.0524	-0.69
1ALG	-1001.84	1.4576	-18.898	7.0024	81.6352	74.004	-6.5088	-4.756	-5.3812	-3.12	-0.1716
1APF	-3391.06	-0.8376	-65.1564	29.508	74.7228	56.104	-6.5416	-4.1016	-5.6132	-4.8036	-1.4764
1AZJ	-2201.87	-0.4856	-41.706	31.7348	89.2964	66.912	-4.722	-1.3492	-3.6656	-5.7684	-0.0356
1B1V	-1158.17	0.0352	-22.0328	7.1668	77.5228	54.488	-7.6548	-2.8344	-3.9848	-0.1412	1.3496
1B22	-4239.79	0.4552	-90.5216	47.8884	62.9412	50.868	-4.5488	-4.5432	-7.2144	-3.2668	-2.9024
1B3C	-5102.85	-1.012	-103.582	8.9668	86.9032	77.44	-5.2312	-3.3124	-3.6248	-0.4588	-0.4136
1BA4	-1616.49	2.286	-36.3716	3.7452	73.4748	61.992	-6.7924	-3.6732	-6.6664	-0.6588	-1.2224
1BAL	-2704.08	0.3716	-57.9532	2.63	90.2876	84.356	-5.5464	-3.9436	-4.1216	1.3436	-1.1312
1BCN	-13190	-1.1388	-271.5	8.1592	85.344	79.628	-1.6504	-2.7156	-4.6132	-1.482	-1.7324
1BCT	-5336.69	1.7956	-116.953	7.0356	94.0288	93.54	-0.262	1.7376	-2.5152	-1.5412	1.4144
1BEG	-8859.56	-0.7816	-180.218	7.0528	88.3748	85.112	-1.3176	-1.9292	-4.1876	-1.9144	-0.7808
1BGK	-2548.39	-0.414	-55.7324	35.5928	72.4572	66.116	-3.884	-2.3828	-6.4672	-3.0928	-2.9944
1BH4	-2137.84	-0.036	-39.1196	10.9096	79.7136	63.324	-5.3412	-3.0372	-4.242	-1.416	-1.598
1BLJ	-9971.52	-0.466	-190.316	62.0924	83.1796	73	-3.0312	-3.0828	-5.6944	-4.7612	-2.2484
1BLQ	-6380.18	0.1436	-130.409	12.4716	82.864	78.792	-3.3364	-3.962	-5.3636	-1.6396	-2.1116
1BLR	-10837.1	-0.086	-220.993	42.5852	69.5112	57.816	-2.1532	-2.6528	-6.6908	-4.572	-1.5204
1BNB	-2529.52	-0.2728	-49.4008	31.8192	77.0004	77.392	-6.3352	-4.1712	-5.4452	-1.566	-0.8036
1BQZ	-5311.72	-0.2912	-111.375	20.8836	80.1072	66.688	-4.5168	-4.4436	-6.326	-1.4144	-1.5352
1BSH	-11224.2	0.2596	-222.26	12.9536	82.6764	73.1	-3.7708	-3.0684	-5.7796	-1.3608	-1.1328
1BY0	-1321.17	-0.2964	-41.6796	4.884	88.32	82.328	-1.6988	-2.6568	-4.7744	-0.1212	-0.9728
1BYM	-6841.95	0.034	-127.69	19.6356	74.4	63.14	-4.5692	-4.0732	-6.378	-2.8704	-1.8832
1BZG	-1470.19	2.668	-35.5372	46.842	74.0004	67.996	-4.5928	-3.8932	-6.6356	-5.11	-4.0244
1C06	-15837	-1.1456	-308.331	8.1184	92.05	87.32	-3.0256	-2.846	-3.4408	1.0904	-0.412
1C49	-2277.04	-1.2256	-52.4224	8.6952	88.3648	75.324	-4.3892	-3.8076	-4.3616	0.6492	-4.4964
1CE3	-3245.36	-0.3692	-69.5656	16.356	77.6924	56.276	-5.2308	-3.158	-4.9852	-1.8604	-0.6096
1CEJ	-5825.52	-0.7996	-127.222	22.7068	73.5308	54.012	-5.1272	-3.58	-5.6824	-3.0408	-2.4676
1CFE	-11749.2	-0.852	-242.015	10.1084	86.4656	78.112	-3.7068	-3.2076	-5.0336	-1.834	-0.3536
1CKY	-1130.16	2.12	-19.9532	6.468	52.6664	24.18	-9.588	-5.3096	-8.4	-1.5876	-2.9132
1CMF	-6022.66	-1.4728	-123.093	56.8	73.6336	67.348	-3.0256	-3.9104	-6.3872	-4.9452	-2.0148
1CMG	-5687.22	-1.1464	-121.308	15.4212	89.5216	82.668	-2.018	-2.1852	-5.7136	-1	0.2764
1CN7	-10089.3	-0.9316	-202.442	11.918	85.0168	78.748	-2.0852	-2.4924	-4.8184	-1.546	-0.5116
1CW5	-2607.43	0.0016	-55.5984	2.7524	80.782	72.22	-5.5664	-2.3884	-5.152	-1.6844	-1.3064
1CW6	-2055.54	0.4452	-44.878	7.046	82.9708	76.32	-4.958	-2.28	-3.8128	-1.0752	0.54
1CX1	-13829.1	-0.9104	-249.462	24.012	78.7808	64.068	-3.3096	-3.6196	-5.9788	-3.3688	-0.9952
1CXR	-3034.03	0.0292	-61.796	21.0308	73.4536	67.664	-4.4856	-3.5536	-6.286	-4.8456	-3.1556
1CZ5	-14950.7	-0.322	-296.304	20.1008	82.36	68.572	-4.0456	-3.982	-5.6944	-1.5128	-1.2476
1D0R	-1780.58	0.6956	-40.6652	3.8424	85.4288	82.72	-3.564	-1.3792	-3.7468	0.5888	-1.7408
1D1N	-8069.29	-0.3764	-146.228	45.5328	67.4216	50.812	-3.9064	-1.3592	-7.2268	-3.1956	-1.8336
1D1R	-5595.23	-0.2368	-122.592	10.0944	80.6416	77.904	-4.2568	-3.35	-4.5776	-0.364	0.1324
1D2B	-12278.8	-0.6704	-224.278	49.5952	83.3212	71.624	-2.9564	-2.9516	-5.3036	-5.1088	-2.2404
1D5V	-9128.03	-1.028	-170.176	8.9292	86.2176	80.192	-4.0992	-2.9508	-4.4888	0.358	-1.77
1DBY	-10760.6	-1.3604	-208.245	13.0172	88.9136	80.772	-1.9072	-2.95	-5.3864	-1.2376	-1.0996
1DC2	-11923.6	0.1784	-252.472	23.8504	76.7008	69.916	-4.4856	-4.0456	-5.8452	-3.1072	-1.344
1DCJ	-7156.69	-1.0504	-146.259	52.4308	85.1144	74.6	-1.7316	-1.6808	-5.0676	-3.8864	-0.4524
1DE3	-13150.2	-1.7492	-258.763	10.4368	85.4064	73.304	-3.9712	-3.5032	-4.484	-1.832	-0.3744
1DKC	-2021.35	0.2864	-41.5856	21.8388	66.3336	47.296	-7.6964	-3.8832	-6.9016	-4.1104	-1.9948
1DMO	-14288.3	-1.67	-299.052	76.8904	80.9596	77.768	-1.0168	-1.1544	-5.7372	-5.55	-0.0936
1DSK	-1693.64	2.61	-34.7048	7.5952	83.6944	76.496	-5.2952	-2.5316	-7.7196	-1.9644	-1.752
1DU2	-4367.28	1.5548	-86.872	12.8484	65.2972	56.58	-7.042	-6.238	-6.9032	-2.3544	-3.2196
1DU9	-1436.32	-1.0072	-31.09	14.2772	84.924	70.676	-5.6168	-2.4472	-4.4756	-2.6416	-1.5396
1E0G	-3974.35	-1.6268	-76.9352	26.6496	90.956	87.248	-3.3616	-1.7584	-3.7708	-3.1556	-0.1808
1E8L	-12196.1	-1.1452	-240.201	19.5024	77.7016	66.764	-3.8728	-3.1448	-5.648	-3.0708	-1.9044
1E9T	-3927.53	-0.2448	-76.936	58.4568	67.7904	53.868	-6.012	-3.7632	-6.084	-5.1868	-2.4396
1EFE	-4388.67	0.6644	-79.7384	9.7584	65.6548	54.656	-7.0728	-4.9384	-6.4088	0.1604	-2.4648
1EGX	-11010.3	-1.1836	-211.063	12.5024	81.9136	67.84	-2.1576	-3.0944	-5.9224	-2.278	-0.9276
1EIH	-5625.49	-0.6832	-115.93	7.4788	83.8872	70.536	-4.6748	-3.4452	-5.256	-0.6664	-1.286
1EPH	-3564.68	0.0696	-69.684	28.8528	63.6872	54.14	-5.6244	-3.4736	-6.2112	-4.4648	-1.054
1EQ0	-17053.5	-1.2032	-311.567	45.924	79.796	67.58	-2.6916	-1.4532	-5.4792	-2.7636	-1.5136
1EZO	-31870.8	0.6784	-588.063	57.5052	67.782	61.564	-4.672	-5.3124	-7.1848	-3.8356	-3.1712
1EZP	-32348.3	0.5856	-602.385	57.1928	69.8136	63.864	-4.416	-5.2036	-7.0636	-3.8616	-3.0216
1F3Y	-16835.9	-1.3688	-326.71	31.716	85.3996	72.7	-1.9288	-2.2964	-5.5468	-3.7984	-1.0004
1F43	-4531.16	-1.2348	-99.1956	45.0708	75.3232	70.444	-4.2076	-4.1372	-6.8256	-4.5848	-2.0356
1FAF	-7284.83	-0.9576	-157.621	26.5232	93.4052	91.568	-2.0596	-2.4436	-3.8316	-2.9056	0.6988
1FCL	-4308.14	-1.2192	-98.4896	10.81	91.2584	82.72	-1.232	-2.284	-4.9808	-2.8808	0.4332
1FDM	-2794.8	1.9632	-59.5408	33.02	66.6664	62.876	-3.3232	-2.522	-7.8672	-3.4068	-3.3608
1FEX	-5132.69	-1.2992	-105.387	9.3384	80.9828	74.02	-3.2592	-3.1984	-5.3164	-2.1208	-1.6676
1FGP	-5258.58	-0.432	-102.301	49.7508	69.7076	52.936	-3.0236	-3.2872	-6.6128	-4.1452	-2.5736
1FJD	-7963.57	-0.436	-155.619	59.0188	71.0212	67.908	-4.6356	-3.3972	-6.2672	-4.2384	-1.5152
1FME	-2061.38	-1.4852	-41.596	7.3016	81.3856	71.012	-4.3352	-1.814	-5.6908	0.7524	-1.6432
1FQQ	-2215.64	0.1876	-44.8108	49.4932	60.1016	51.2	-6.9956	-4.6224	-6.6696	-6.126	-2.6776
1FR0	-12257	-1.3996	-264.134	15.0792	92.26	85.932	-0.7412	-2.2032	-4.0412	-1.5712	-1.2248
1FWO	-1959.65	0.4548	-37.5828	8.5468	63.5188	48.992	-6.0572	-3.4344	-6.3912	-2.8356	-2.6528
1G26	-2146.46	0.2148	-42.0784	7.1492	90.4828	76.172	-5.17	0.47	-2.9388	-2.482	0.4932
1G2T	-5971.8	-0.8108	-117.596	10.0508	85.3356	76.332	-4.422	-3.0044	-5.13	-1.2308	-1.548
1G6J	-7008.34	-1.826	-138.564	9.5204	94.2696	90.656	-1.9072	-1.9756	-1.86	0.1576	1.5432
1G6M	-2999.18	-0.8864	-80.6872	12.2172	80.0012	62.24	-5.9436	-3.2856	-5.2248	-1.9384	-1.2288
1G91	-5824.32	-0.314	-115.077	7.29	88.8524	80.136	-4.4744	-2.9468	-3.7516	-0.194	-1.7548
1G9L	-8971.61	1.0312	-174.832	50.0612	74.1128	64.144	-5.5796	-4.6204	-6.1876	-3.872	-1.9984
1G9P	-2318.16	0.9672	-49.7712	10.4328	83.164	72.508	-6.6764	-4.4368	-4.6844	-1.1928	-1.2776
1GB1	-4653.53	-1.6628	-101.511	23.1092	91.48	82.8	-0.5016	-1.8872	-4.7812	-2.0044	0.956
1GB4	-4891.71	-1.2444	-100.05	16.9048	85.5268	75.372	-1.2372	-1.76	-5.486	-1.51	0.7044
1GD5	-12325.8	-0.0972	-239.42	25.2608	81.2508	74.112	-3.5468	-3.2816	-5.838	-4.7884	-1.2656
1GE9	-17915.1	-0.9892	-401.688	22.7792	92.3976	87.688	-0.2992	-1.0828	-1.782	-1.62	0.2948
1GGW	-11569.8	-0.3216	-227.304	28.7772	73.1592	68.612	-2.968	-2.8812	-5.9648	-3.2224	-1.6976
1GH9	-4787.12	-0.0236	-100.938	16.0268	80.116	74.232	-5.068	-2.8996	-5.698	-3.0204	-1.4724
1GHK	-5551.55	-0.1824	-103.762	22.3684	81.766	68.648	-4.1196	-2.3136	-5.4768	-1.838	-0.474
1GHU	-8890.51	-0.7572	-170.041	7.7908	88.9896	77.784	-3.6768	-3.1608	-4.6196	-0.8116	-0.6924
1GJS	-5084.53	0.1764	-104.72	5.4252	88.6992	81.508	-3.09	-2.5808	-4.7424	-1.3108	-1.3416
1GXE	-8298.77	-0.0424	-158.551	36.926	76.094	64.676	-5.684	-4.9988	-5.9192	-3.4564	-1.0052
1GYZ	-5666.73	-0.7952	-113.067	49.1268	81.862	71.632	-2.6612	-2.0448	-5.5752	-3.6968	-1.23
1H0Z	-4281.37	-1.2188	-100.27	14.1768	83.3324	74.136	-4.2104	-3.584	-4.2872	-2.6416	-1.0008
1H2O	-14732.3	-0.8512	-295.089	32.2484	88.7388	75.948	-1.2412	-1.55	-5.3312	-2.8788	-1.006
1H3Z	-10970.3	-1.8564	-207.772	11.6928	97.7736	94.456	-2.1652	-1.486	-2.1464	-1.6368	0.2864
1HA6	-5640.42	-0.0752	-108.053	21.3972	77.8224	65.824	-4.172	-3.4348	-5.5284	-3.0648	-2.3644
1HA8	-4114.93	-1.8968	-85.5928	22.4752	71.6748	61.02	-3.1676	-2.4284	-6.6444	-4.3332	-1.6552
1HDL	-4072.07	0.0412	-83.9176	20.8516	77.208	72.24	-3.8636	-4.3696	-5.852	-3.318	-3.7204
1HP2	-2572.2	-0.8008	-55.0156	15.244	84.9132	69.66	-4.6916	-3.0416	-4.8224	0.4272	-1.6408
1HP3	-1849.23	0.0708	-38.566	18.1492	83.0668	61.364	-5.5392	-3.2124	-6.178	-3.8968	-1.6412
1HPW	-8284.56	0.2832	-164.426	33.336	67.3696	55.664	-4.4012	-3.7716	-6.5232	-2.9428	-1.5392
1HS7	-10004.6	-2.596	-229.167	16.2884	95.5784	91.948	0.8828	-0.2768	-3.09	-1.9012	-0.7
1HVW	-1593	-2.4264	-34.5824	10.7956	95.4772	77.436	-3.6572	0.4208	-0.61	-2.6636	-0.138
1HX2	-3521.52	-0.3784	-72.4724	23.376	81.9308	60.396	-4.9376	-3.4636	-5.8464	-3.1424	-1.6996
1HZK	-8621.19	-0.726	-170.715	11.0908	88.778	81.276	-2.7324	-2.0076	-3.6968	-2.212	0.6628
1I25	-1712.13	1.1892	-40.5616	5.63	83.6564	69.412	-6.3324	-2.6352	-4.7988	1.3272	-1.6288
1I2U	-3039.06	-0.6952	-63.8688	9.5704	80.0936	66.856	-4.5528	-3.0136	-4.7444	-3.0964	-0.828
1I2V	-3043.9	-0.0944	-63.1704	6.7436	83.7128	67.536	-4.5932	-3.2488	-3.9704	-4.1492	-0.4068
1I42	-6882.07	0.228	-134.333	57.5096	79.6776	72.74	-2.868	-3.9936	-4.5996	-5.4796	-1.624
1I6C	-1815.51	-0.2576	-44.1756	35.0324	72.2156	63.224	-4.6684	-3.3496	-6.4252	-4.5056	-2.3412
1I6G	-4342.78	-1.1216	-94.0092	5.89	95.104	84.788	-3.2796	-2.0868	-2.7444	-1.2544	0.3168
1IDL	-4126.01	0.3076	-84.224	24.9948	57.3332	40.716	-7.2276	-4.9352	-7.22	-2.0712	-3.0076
1IE6	-1237.31	-0.2108	-34.76	42.2392	68.904	56.264	-5.7144	-2.9868	-5.8872	-2.4728	-3.3712
1IEZ	-16076.2	0.7844	-282.376	42.902	56.2032	39.036	-6.2948	-5.4556	-7.6456	-3.3448	-3.3584
1IFW	-6358.56	-0.62	-138.621	21.972	81.9548	72.292	-4.6744	-4.7032	-6.1304	-2.464	-2.9404
1IG6	-10006.7	-0.9168	-202.783	18.2564	78.7436	72.928	-3.9192	-3.7708	-5.6868	-2.074	-2.0272
1IGL	-4867.02	-0.0008	-91.9404	18.4328	70.6464	57.6	-6.2844	-4.3988	-6.7068	-3.5316	-2.2052
1IOX	-3138.75	0.7884	-63.6272	9.8152	81.1664	69.324	-6.448	-4.4952	-5.9348	-0.892	-1.5896
1IP9	-7544.88	-1.0824	-149.227	19.1904	86.4108	77.64	-1.2108	-2.1584	-5.242	-2.3536	-1.2228
1IRH	-4173.39	-0.5932	-87.1768	7.0184	82.0356	66.16	-4.6572	-4.0328	-5.508	-0.1692	-1.5712
1IRZ	-5473.76	-0.526	-108.858	7.3716	91.8716	81.308	-3.0612	-2.2604	-5.2784	-0.306	-1.7904
1ITF	-19031.4	-1.4548	-390.762	8.9264	91.9256	85.224	-1.1212	-1.5888	-2.8488	-1.4032	-0.5488
1IVM	-12569	-0.9828	-245.781	23.7392	76.7796	69.296	-3.4464	-3.5528	-5.406	-3.504	-1.8884
1IW4	-3634.66	0.108	-71.3724	31.0444	68.4528	53.504	-4.846	-3.5544	-7.2016	-5.1672	-2.4088
1IY5	-4143.4	-1.2132	-81.964	13.9972	89.0756	75.38	-3.68	-2.2808	-4.1716	-1.5876	-1.8548
1IY6	-3806.38	-0.3552	-77.9952	32.4664	70.6908	60.348	-4.504	-2.1884	-5.7056	-3.2244	-1.6416
1IYC	-1515.44	1.0228	-31.6464	49.3744	51.176	35.42	-7.4112	-5.344	-8.376	-4.5592	-3.5092
1IYY	-8060.69	-0.8696	-163.667	17.4044	71.2564	60.888	-4.6716	-3.8776	-6.41	-2.8904	-1.8396
1J6Y	-8292.97	0.006	-166.549	20.6992	65.0848	55.844	-5.5272	-4.5596	-6.836	-3.3016	-2.0608
1J7M	-4622.26	-1.284	-90.2492	15.1364	79.3104	69.268	-4.5148	-3.1996	-4.7588	-2.4524	-1.8308
1J7Q	-6412.44	-0.9116	-142.184	76.4756	73.6196	72.108	-3.3468	-4.4256	-5.7216	-6.0204	-2.2212
1J8C	-6830.35	0.0076	-128.266	24.8264	66.4984	52.652	-5.6552	-4.4084	-6.8272	-1.812	-2.8088
1J8K	-7062.01	-0.8736	-139.546	19.9436	77.7388	67.448	-4.6404	-3.6884	-5.4408	-2.1712	-0.5532
1JAS	-15374.4	-1.844	-300.497	22.8404	83.0928	74.152	-2.1976	-2.496	-5.0588	-3.2812	-0.5948
1JC6	-4091.01	0.1388	-86.7544	17.5	69.9684	58.9	-5.8788	-4.6472	-6.1608	-2.0984	-2.9244
1JCU	-16690.6	0.1316	-301.454	22.5544	70.1744	57.648	-5.7936	-5.0136	-6.8384	-3.3348	-2.2096
1JE3	-6395.56	0.324	-133.399	32.7252	68.1268	57.42	-6.2552	-5.0184	-6.7048	-3.276	-2.6828
1JE9	-3261	-0.4916	-82.5344	16.026	75.9336	59.208	-5.2624	-3.61	-5.5844	-2.478	-1.7288
1JFN	-7722.76	0.0632	-153.182	21.1424	74.4956	60.284	-6.5596	-4.986	-5.2552	-2.4248	-2.0468
1JGK	-4166.71	0.5636	-90.6852	24.846	72.938	59.572	-4.7484	-3.8728	-5.8552	-1.5296	-1.5908
1JI8	-9920.58	-0.7648	-198.148	9.0604	81.2472	78.22	-3.5384	-3.7636	-4.036	0.118	-1.426
1JJG	-7119.21	0.9232	-138.036	13.1644	77.4	67.64	-6.072	-4.3704	-5.0788	-1.0916	-1.578
1JKZ	-3435.04	-0.5712	-71.7636	13.8408	72.9996	69.792	-3.5932	-3.7704	-4.1988	-1.1276	-2.5228
1JLZ	-1253.42	-0.7256	-29.114	4.66	84.5712	70.6	-4.3444	-2.258	-4.3796	-0.0152	-0.7044
1JNJ	-9043.23	-0.8372	-171.982	10.124	81.916	69.296	-4.2924	-3.3044	-5.3324	-2.2876	-1.106
1JNS	-7650.77	-0.0844	-147.821	38.9524	71.3332	60.372	-4.4204	-3.1696	-6.2752	-2.8344	-1.2976
1JO5	-2748.45	2.9392	-47.3996	7.8416	69.3052	54.18	-6.9112	-5.0244	-6.4428	-1.2172	-2.9268
1JO6	-1949.52	1.042	-43.4796	8.6372	76.838	68.888	-6.2596	-4.7668	-5.3552	-1.7968	-2.3892
1JOR	-12817.1	-0.8196	-263.865	6.6092	88.8188	79.272	-3.7944	-3.0852	-3.01	2.0872	-1.0244
1JRJ	-2368.75	-1.2356	-55.5488	1.1832	93.728	92.152	-2.4244	0.1356	-4.4904	0.3512	0.4288
1JV8	-4621.09	-0.5232	-95.488	7.5536	83.7848	72.084	-3.1868	-2.8528	-4.1724	-0.7836	-1.8548
1JW2	-5727.22	0.0888	-112.319	18.956	79.086	69.992	-4.2052	-4.0324	-5.9316	-3.064	-2.208
1JW3	-12780.9	0.3712	-234.598	36.8904	60.7824	47.296	-4.2704	-3.7296	-7.3188	-3.8848	-2.874
1JWE	-11801.6	-1.6848	-245.675	9.1348	93.6784	85.776	-1.2428	-1.9344	-2.7236	-1.0784	0.472
1JYT	-11169.6	1.1912	-218.185	19.5268	83.602	77.148	-5.1536	-5.4948	-5.3724	-2.086	-1.802
1K0P	-1542.26	0.3972	-27.5608	95.5284	40.9648	16.496	-8.3472	-4.084	-8.5564	-5.12	-4.2312
1K1V	-3084.64	-1.2	-72.4708	9.1736	94.36	88.876	-1.4344	-0.7648	-5.4668	-0.214	-1.9268
1K8B	-3942.93	-0.3052	-88.2564	49.2376	80.88	83.892	-2.4612	-1.3908	-2.6372	-1.8572	2.0572
1K9C	-2978.46	-0.4776	-68.8208	13.3332	73.944	54.476	-6.3536	-4.7748	-5.3152	-3.4528	-1.98
1KGM	-1672.98	-0.6232	-36.6944	9.63	78.5476	61.28	-6.28	-2.5012	-5.8208	-2.0788	-1.5124
1KIO	-1669.72	-0.6904	-36.5532	9.96	76.6084	57.708	-6.2272	-2.4344	-6.4384	-1.7228	-1.4976
1KJ0	-1547.04	-1.1608	-34.0264	24.78	60.004	46.924	-7.1184	-3.3372	-6.9224	-2.998	-1.4824
1KMD	-10971.3	-1.23	-220.006	7.7584	91.8928	86.656	-4.066	-3.986	-4.5796	-0.0432	-1.0288
1KOZ	-2473.99	-0.0532	-45.3368	16.8012	67.0584	53.46	-5.5812	-3.5788	-5.4612	-4.4832	-2.3192
1KQH	-2632.11	0.6212	-51.4784	12.6376	84.5564	68.532	-6.0156	-3.6628	-5.964	-2.4308	-2.2456
1KQI	-2738.01	0.4244	-53.1468	12.854	82.334	68.936	-5.782	-3.2776	-6.2388	-2.0044	-2.4188
1KRW	-11633.5	-0.1892	-222.543	17.486	75.0744	68.068	-3.6328	-4.2984	-6.2688	-3.5196	-1.8248
1KUN	-4089.61	-0.61	-85.2088	14.2728	77.8568	65.536	-4.258	-3.6228	-5.8592	-2.4732	-1.9472
1KV4	-2530.44	0.4776	-58.14	7.684	94.5	89.94	-1.9152	-0.0068	-4.4364	-0.9488	0.07
1L1I	-5728.13	-1.6168	-118.359	18.9968	74.2924	58.108	-4.1016	-2.678	-5.836	-3.716	-3.028
1L3G	-9804.8	-0.1492	-197.496	23.4772	86.9084	80.156	-3.7204	-4.0108	-4.27	-2.4008	-1.5016
1L3H	-4538.1	-0.864	-91.6248	10.5788	82.7308	71.672	-4.8936	-2.5708	-4.5144	-1.5444	-0.5308
1L3Y	-2336.91	-0.4036	-47.0564	32.1856	75.4868	54.352	-5.7928	-2.3412	-5.6604	-2.1732	-0.4908
1L7B	-6716.79	-0.4828	-140.91	21.792	79.866	72.856	-4.1556	-4.3004	-5.8452	-2.0732	-1.2624
1L7Y	-7902.92	-0.8432	-151.407	6.6276	82.7824	78.792	-3.954	-3.6064	-4.2344	-0.8128	0.2076
1LD6	-3927.42	0.58	-83.6404	4.7204	82.1428	71.176	-4.9076	-3.3656	-5.3436	0.2656	-2.6684
1LFC	-1063.17	2.8012	-22.0468	19.8676	58.436	35.816	-8.2096	-3.2448	-7.2832	-1.4292	-2.4612
1LKJ	-14216	-1.276	-297.074	2.8296	89.5284	87.168	-0.6876	-0.6848	-3.198	-0.0204	-0.1732
1M2F	-14558.6	-0.8524	-270.817	5.6784	90.0448	79.868	-2.4648	-3.2592	-5.1228	1.0304	-0.7216
1M30	-4687.58	-1.4328	-91.1056	28.79	70.1428	52.008	-3.8964	-0.6196	-6.4664	-3.3492	-1.7796
1M5Z	-8036.57	-1.0772	-150.749	17.582	86.3372	81.124	-3.7208	-2.6108	-4.4704	-1.7984	-0.856
1MB6	-2390.25	-0.1724	-49.0236	8.7948	93.334	74.88	-3.5704	-2.55	-3.8772	-0.5428	-2.6712
1MG8	-7062.93	-0.94	-129.996	21.7032	73.4732	59.056	-3.8364	-3.558	-6.1664	-2.6592	-0.82
1MK3	-12872.1	1.2368	-250.251	5.9764	79.432	68.948	-6.162	-5.6512	-6.0584	-0.8972	-3.2812
1MMC	-1889.39	-0.9356	-37.2148	8.932	89.0008	61.904	-7.9684	-3.3476	-5.2736	-1.1724	-0.2696
1MNL	-7360.61	-0.1756	-152.196	37.3164	64.4036	54.288	-4.1924	-3.5896	-7.2748	-1.9728	-2.7032
1MPZ	-2319.28	-0.2196	-48.5712	63.4572	41.232	27.252	-6.4064	-4.0556	-8.4452	-4.698	-3.0016
1MUT	-11092	-0.1324	-213.888	19.7328	76.7252	66.516	-4.7704	-4.2564	-6.3184	-2.796	-1.5352
1MZK	-10735.3	-0.8488	-200.645	34.7068	74.7332	57.524	-2.6408	-3.1512	-6.2912	-4.7104	-1.7444
1N4I	-6614.56	-1.3428	-131.959	28.9012	65.3176	49.18	-3.8908	-2.9236	-6.7708	-4.048	-1.9108
1N88	-8462.41	-0.486	-164.802	33.434	82.3404	73.596	-2.9348	-3.3064	-5.2304	-3.2148	-0.3932
1NBL	-3317.79	-1.228	-75.3864	30.6896	91.454	81.676	-2.0184	-2.1108	-3.9944	-3.9276	-2.2248
1ND9	-3145.9	-0.462	-71.1904	66.9128	74.0428	76.612	-2.8708	-3.508	-6.5444	-4.2824	-1.8396
1NE5	-2831.79	-0.554	-67.0716	13.1592	81.2	69.992	-4.802	-2.2324	-5.5792	-3.0052	-1.3424
1NER	-6700.97	-1.3788	-130.896	11.0192	83.5	72.432	-4.1204	-3.3988	-4.754	-0.8444	-1.4772
1NFA	-12672.5	0.7276	-228.916	13.2432	72.5228	56.876	-7.3112	-5.776	-5.9308	-1.3272	-1.6328
1NI7	-15458.2	-1.08	-297.604	9.8912	91.214	84.336	-2.5604	-2.5056	-4.4672	-1.1064	0.088
1NMV	-12958.5	-0.6996	-271.98	14.9004	89.3408	82	-3.1412	-1.7144	-3.8388	-0.0884	-0.748
1NOR	-3445.41	-0.8652	-91.254	25.0488	93.6296	79.28	-3.2576	-2.2564	-3.4236	-3.1328	-1.0684
1NWV	-8849.18	0.5696	-172.534	56.6484	60.0004	44.632	-6.0152	-3.834	-6.6856	-5.0212	-2.1636
1NY9	-7624	-0.5492	-167.302	20.3636	87.4792	83.896	-2.9688	-3.1644	-5.1452	-3.6972	-1.3956
1NYN	-8890.57	-0.8732	-178.964	4.4716	83.7788	76.812	-4.5512	-3.5548	-4.8564	0.6968	-1.0556
1O78	-5029.08	0.2748	-86.9296	58.3488	62.7324	46.7	-5.318	-2.8132	-7.1608	-2.4548	-1.398
1O8R	-7302.83	-0.768	-142.165	36.2396	69.956	62.688	-4.6852	-4.8744	-6.7596	-3.002	-2.998
1O8T	-3947.17	1.2424	-80.1884	9.2088	74.9088	59.708	-5.61	-4.1796	-6.4672	-0.5672	-1.878
1OCA	-16935.9	-1.5164	-316.932	9.35	90.0604	74.08	-2.7828	-2.6064	-4.2904	-0.7072	-0.3808
1OJG	-11433.2	-0.3672	-203.03	34.314	63.7916	51.4	-5.0544	-4.3152	-7.1604	-3.496	-2.6996
1OQ3	-6113.08	-0.6128	-121.527	14.2744	86.5944	75.096	-3.4644	-3.7832	-5.588	-1.7544	-0.192
1ORX	-1512.9	-1.2664	-28.3232	39.2016	84.3628	70.016	-4.2888	-2.3868	-6.24	-5.3036	0.9036
1PBU	-19850.9	-1.9356	-362.571	17.8296	83.1508	72.456	-2.5604	-2.9616	-5.5156	-3.6468	-1.9556
1PLO	-9377.26	-0.2236	-184.53	12.194	76.7328	61.768	-4.3668	-4.4756	-5.3952	-2.588	-2.4992
1PMC	-1720.89	-0.4648	-36.8692	21.618	73.6476	57.52	-5.9712	-2.2996	-4.7612	-1.1012	-0.6124
1Q27	-13481.6	0.3344	-271.346	19.53	73.1596	63	-3.9556	-4.0268	-5.6192	-1.6804	-1.8864
1Q2K	-1933.48	0.4536	-45.3012	27.1692	83.45	81.056	-2.3648	-0.9728	-4.7416	-2.9212	0.6192
1Q2N	-5179.72	-2.206	-120.506	12.814	92.7864	86.264	-0.3448	-0.1976	-3.7956	-1.7644	-0.6636
1QFD	-2129.44	-1.082	-43.5104	11.1224	78	60.184	-7.4692	-2.804	-4.936	-1.9556	-0.8736
1QHK	-3534.9	-0.822	-75.2824	9.1904	79.822	72.7	-4.0132	-2.784	-5.7912	-2.4296	-0.7184
1QK6	-1868.78	0.12	-37.9944	8.7216	68.6452	50.08	-7.4376	-4.5388	-6.3808	-2.1656	-2.3668
1QK7	-2171.05	0.2452	-42.6948	5.1932	79.1992	60.64	-5.934	-3.2024	-4.8668	-2.1148	-1.0092
1QKH	-5760.18	-0.1856	-107.886	32.7884	75.436	64.388	-4.2844	-3.594	-6.5552	-3.8528	-1.3396
1QQV	-5011.07	-0.588	-99.7732	34.0952	82.2168	76.268	-3.6804	-3.3516	-5.9268	-3.964	-1.0588
1QU5	-15193.7	-0.0996	-290.642	31.1576	72.378	58.256	-4.3044	-3.7296	-6.2004	-2.5424	-1.5592
1R63	-5757.32	-2.0928	-122.634	9.8696	93.44	89.54	-2.3544	-2.1128	-3.412	-1.5756	0.5764
1ROO	-2400.16	-0.176	-47.6868	33.4164	78.4264	71.612	-4.4476	-2.3628	-7.0576	-3.7792	-2.6372
1SPY	-7818.33	-1.11	-153.887	6.1588	90.7124	83.332	-2.5412	-2.6696	-5.0276	0.0304	-1.1264
1TFS	-4042.07	-0.0436	-85.4952	14.2452	82.2752	71.776	-5.4356	-3.4208	-4.7484	-2.99	-2.0392
1TIH	-3333.26	-0.6668	-66.852	13.0536	76.078	63.324	-4.9392	-3.2548	-6.4176	-2.6816	-1.074
1TLE	-3497.69	-0.2208	-68.68	26.1936	78.5716	51.56	-5.6	-3.868	-5.9004	-3.682	-2.1652
1TNW	-13201.5	-0.1168	-282.599	11.332	89.7504	87.052	-1.7816	-2.8624	-4.6976	-2.6868	-1.4344
1TOF	-11296	-0.8344	-221.582	13.7028	85.8536	80.244	-0.8064	-1.936	-5.116	-1.938	-0.6016
1UGL	-2453.89	0.1532	-61.4372	34.454	69.3336	57.712	-6.4576	-4.7264	-6.9752	-3.0348	-3.426
1VTP	-1339.62	-0.38	-29.4216	3.2348	90.5008	81.056	-3.2188	-2.5544	-4.1412	-0.3	-1.9332
1WKT	-7417.36	-1.2092	-141.015	13.4924	84.5124	72	-3.666	-3.144	-4.114	-2.7424	-0.9044
1ZAQ	-2846.16	0.2808	-50.794	15.4712	58.762	39.208	-7.3128	-3.196	-7.56	-1.2756	-2.9836
2BBG	-2780.24	-0.7072	-58.2992	23.8048	81.158	62.62	-5.1896	-3.8044	-6.8212	-4.8712	-1.838
2CPB	-2946.34	1.7396	-66.9644	10.9244	88.2488	87.524	-1.7356	-1.0056	-4.4476	-3.6732	0.0964
2CPS	-2822.57	1.9156	-63.5336	20.08	87.0012	87.904	-2.0228	-1.1276	-6.086	-4.1704	-0.616
2EZL	-8985.08	-0.9764	-187.126	7.3676	92.0824	88.796	-2.822	-2.928	-4.5872	-0.7748	-1.6676
2HID	-7676.34	-1.5088	-153.663	7.6336	96.564	91.004	-1.1376	-1.776	-3.1612	-0.3548	0.5516
2IGG	-4395.54	-0.8472	-98.8212	14.1008	87.6128	82.916	-2.9764	-2.7244	-5.3668	-2.7072	-0.9
2IGH	-4336.19	-0.8012	-97.1016	12.2708	87.3912	80.44	-2.74	-2.744	-5.5532	-3.2996	-0.6876
2KTX	-2465.6	-1.1628	-50.7756	31.7496	76.3336	64.668	-5.0108	-2.9	-6.7364	-2.5296	-2.224
2LFB	-7628.15	-0.6604	-164.511	5.6064	84.4464	75.516	-4.3264	-3.6532	-5.0164	-1.068	-0.9184
2MOB	-8046.05	0.104	-151.172	31.0092	74.9124	66.4	-2.7792	-3.2248	-6.7436	-3.3316	-2.1892
2PTA	-2302.14	-1.3192	-51.0292	14.3732	88.7284	75.564	-5.0868	-4.0328	-4.6572	0.364	-3.8224
2R63	-5717.08	-1.8876	-119.135	9.9788	90.7528	85.02	-2.234	-2.0988	-4.3552	-1.998	-0.0224
2SOB	-7255.21	0.1972	-134.046	24.2144	68.2012	51.2	-5.7584	-4.8656	-6.7264	-1.8028	-2.2812
3BDO	-6734.8	-0.5396	-114.926	30.7476	65	43.536	-4.3136	-1.7896	-7.2668	-3.6048	-1.7196
3GB1	-4734.11	-1.764	-106.052	3.7908	97.0388	88.88	-0.6728	-1.1608	-3.0748	1.07	0.9456
3HSF	-8510.01	-1.0952	-161.372	6.8256	82.6668	72.76	-3.7432	-3.4696	-4.82	0.2516	-2.866
3PDZ	-7164.82	-0.8736	-132.234	40.0276	63.6168	51.796	-3.9096	-2.7056	-7.0172	-4.622	-1.0584

## Sheet: CNW
CNW	DOPE	nDOPE	dDFIRE	CLAS	RAMA	PRORAMA	1st	2nd	RAMA	rotamer	backbone
1A57	-9399.23	-0.616154	-176.013	20.2354	69.2638	52.8462	-1.93269	-2.30615	-5.86923	-2.89231	-2.11115
1A5J	-9177.3	-1.02962	-195.891	15.5446	79.7023	71.5423	-2.88654	-2.565	-4.36962	-2.71231	-2.08731
1AB7	-10269.3	-2.52308	-204.502	11.8708	86.6054	81.1615	0.0876923	-0.971154	-2.34654	-1.06615	-0.615385
1AF8	-7575.82	-1.06462	-157.857	10.7223	83.4238	77.2808	-2.04923	-2.12115	-4.01154	-3.78538	-1.08962
1AH9	-5962.99	-1.19462	-107.791	25.1765	81.5519	70.2308	-2.19231	-1.29962	-5.25423	-4.00731	-1.08654
1AHL	-3498.86	-1.14923	-66.3531	10.965	86.0877	79.0654	-4.10115	-3.07692	-2.94692	-4.83269	-1.72615
1AJW	-14861.8	-1.74808	-283.012	16.6573	84.2642	76.3154	0.775385	-1.36885	-3.85577	-2.23115	-1.21577
1ALG	-1150.82	0.846923	-23.235	6.96077	80.4185	76.0615	-4.22692	-3.17115	-4.675	-3.045	-1.22692
1APF	-3536.5	-1.20385	-68.1962	18.8796	81.5877	67.3077	-5.07538	-3.29846	-4.52692	-4.11885	-1.68769
1AZJ	-2278.2	-0.782692	-43.6546	19.6277	91.97	80.6231	-3.01423	-1.06	-2.58308	-4.19615	-0.965385
1B1V	-1209.58	-0.261923	-23.5308	7.35	82.9662	70.9077	-5.18	-0.654615	-1.94038	-0.447308	0.879231
1B22	-4586.31	-0.0788462	-97.3504	27.7146	65.5562	55.9692	-3.595	-3.74462	-6.57615	-3.68308	-4.16885
1B3C	-5289.27	-1.39692	-107.822	10.4723	87.0973	78.7692	-3.33692	-2.14269	-2.74346	-1.21077	-0.463462
1BA4	-1894.43	1.59538	-44.5346	5.46615	79.2519	69.2346	-4.15462	-2.15731	-3.98654	-1.93269	-1.35231
1BAL	-3150.78	-0.406923	-69.1869	4.31231	89.0131	80.7731	-3.19615	-2.16385	-3.57962	-0.941538	-1.11346
1BCN	-14139.4	-1.87154	-294.413	11.9104	86.1123	79.4769	-0.417692	-1.67	-2.94731	-2.33615	-1.55
1BCT	-5347.57	1.505	-117.689	9.24115	92.8223	91.4462	0.675	2.72231	-0.417308	-1.77808	1.43962
1BEG	-9715.54	-1.61577	-197.158	7.71962	87.7796	83.9577	0.0684615	-0.613462	-2.43231	-2.40077	-0.885
1BGK	-2780.52	-1.02962	-59.9638	21.6465	82.9654	73.8692	-2.01538	-1.81192	-4.375	-2.16038	-3.42077
1BH4	-2130.92	-0.213462	-38.8331	12.5527	78.5704	61.3808	-3.53115	-1.95462	-4.30923	-2.10231	-2.09846
1BLJ	-10529.4	-1.03385	-200.258	35.6665	85.5435	78.6538	-1.48962	-2.08038	-4.32692	-3.72923	-1.82231
1BLQ	-7200.05	-0.700385	-152.124	12.2192	81.9058	78.3154	-1.99769	-2.76962	-4.54731	-2.70731	-2.19731
1BLR	-11722.1	-0.755769	-239.552	25.3846	77.2646	66.6269	-0.135	-1.61308	-4.23885	-3.39885	-1.49385
1BNB	-2635.91	-0.641923	-51.3331	15.5335	80.1288	77.3731	-4.36731	-3.42269	-3.36654	-1.36077	-1.29231
1BQZ	-5997.23	-1.09769	-130.821	20.0812	81.3335	71.8038	-2.56538	-2.90692	-5.49731	-2.58308	-2.85692
1BSH	-12508.7	-0.631154	-254.467	12.3642	83.3708	76.9846	-1.03115	-1.02885	-4.065	-2.34615	-0.706923
1BY0	-1480.65	-0.836154	-46.0288	9.91346	88.1538	79.65	-1.10731	-1.48462	-3.89692	-1.93231	-0.528846
1BYM	-7590.06	-0.706538	-141.67	10.9427	76.7212	66.9808	-2.57692	-2.79577	-5.12923	-3.60038	-2.07346
1BZG	-1654.66	2.06462	-39.8592	24.2308	79.2069	70.8346	-3.33731	-2.72192	-4.78615	-3.80346	-4.00462
1C06	-17135.6	-1.95115	-336.741	10.9227	90.2004	85.7038	-1.22731	-0.895385	-2.35269	-0.223077	-0.596538
1C49	-2332.28	-1.46846	-53.2338	10.5196	89.7442	79.0692	-2.95231	-2.60154	-4.05038	-0.193462	-4.17385
1CE3	-3433.18	-0.767308	-72.7146	10.4354	78.4031	61.3615	-3.45	-2.135	-4.29923	-2.51269	-0.779231
1CEJ	-6207.49	-1.21692	-132.84	19.7396	73.8135	57.4038	-3.35	-2.39308	-4.75538	-2.605	-2.56038
1CFE	-12553.7	-1.47885	-262.249	11.3742	88.9238	81.1346	-1.47269	-1.31577	-2.50038	-2.04308	-0.383462
1CKY	-1295.53	1.46923	-23.2869	8.70654	70.3523	44.6846	-6.46308	-3.85423	-7.08769	-1.30731	-3.73846
1CMF	-6276.17	-1.88692	-130.412	38.4958	78.6023	71.7346	-2.19923	-2.85385	-5.60654	-5.08038	-2.44038
1CMG	-6040.02	-1.65654	-132.342	15.3365	88.7327	81.6269	-0.823462	-1.12923	-3.285	-1.51538	-0.661538
1CN7	-10643.3	-1.53654	-214.545	10.3869	86.2008	78.6808	-0.373462	-1.10462	-3.17462	-2.41077	-0.828077
1CW5	-2779.65	-0.400769	-59.8369	5.06808	83.1931	73.8731	-3.81192	-0.966538	-3.34038	-1.76769	-0.698077
1CW6	-2192.77	0.0146154	-47.8396	8.01423	81.0996	75.5192	-3.47269	-1.19808	-2.87808	-0.603077	0.0365385
1CX1	-14983.2	-1.65577	-270.522	16.9915	81.4819	69.3846	-0.838846	-1.78577	-4.67192	-3.35115	-1.33577
1CXR	-3143.52	-0.319615	-64.9877	14.9262	77.885	76.3923	-3.17231	-2.25885	-5.32731	-3.65923	-2.70577
1CZ5	-16325.5	-1.055	-318.686	14.9381	83.1446	74.5577	-1.89077	-2.10154	-4.13538	-2.75462	-0.998462
1D0R	-1819.82	0.414231	-41.7504	7.30615	80.9054	79.6923	-2.55731	-0.525385	-2.59962	-0.715769	-1.84923
1D1N	-8579.47	-0.948846	-161.507	22.4988	74.3058	64.7615	-1.99462	-0.671538	-5.65115	-2.73385	-1.88192
1D1R	-6480.47	-1.16654	-138.945	9.27962	80.1523	72.7769	-1.57962	-1.98346	-4.12923	-2.08423	-0.172308
1D2B	-12871.2	-1.24269	-236.23	26.8604	87.4385	76.3654	-1.06615	-1.42846	-3.85769	-3.30885	-2.17462
1D5V	-9675.99	-1.66577	-185.81	10.2727	89.0465	86.1538	-2.16308	-1.34	-2.05846	0.312308	-1.00808
1DBY	-11725.5	-2.22	-228.94	11.3992	90.0008	82.1923	-0.0896154	-1.41346	-3.62923	-2.15692	-0.888462
1DC2	-12571	-0.331923	-269.778	16.13	80.7946	73.0923	-3.24846	-2.75346	-4.36231	-3.20269	-1.295
1DCJ	-7444.1	-1.50192	-154.083	22.7565	91.14	81.0192	-0.276923	-0.546154	-1.97385	-2.63269	-0.457308
1DE3	-13810.7	-2.23269	-274.484	10.9992	85.9138	78.05	-1.76192	-1.77115	-2.70192	-2.10577	-0.499615
1DKC	-2187.31	-0.178462	-45.3542	15.4738	72.5427	59.8885	-5.34423	-2.87423	-5.02577	-4.02269	-1.91385
1DMO	-14609.1	-2.02269	-308.795	49.9631	86.3565	83.1731	-0.0346154	-0.198462	-3.36115	-4.31231	-0.255769
1DSK	-1806.37	2.06	-39.1238	9.16769	85.0592	77.7192	-2.99038	-0.916154	-5.53346	-1.31538	-1.85038
1DU2	-4817.4	0.92	-96.5646	13.1762	69.8546	59.7077	-5.25192	-4.78808	-5.72423	-2.80385	-3.25231
1DU9	-1496.16	-1.25923	-32.1088	8.98308	86.3919	75.2808	-3.93846	-1.96538	-3.76846	-2.81	-2.75769
1E0G	-4068.66	-1.92885	-78.4423	24.7327	91.8896	87.6462	-2.53538	-0.942308	-2.73615	-3.33538	-0.325385
1E8L	-12900.5	-1.74615	-258.567	13.8485	83.7973	72.8692	-2.15538	-1.77885	-3.97731	-2.85538	-2.025
1E9T	-4125.5	-0.654231	-78.845	23.8092	71.93	62.1154	-4.42885	-2.90077	-4.825	-4.69962	-1.90654
1EFE	-4903.03	-0.168077	-90.555	11.3319	68.0369	57.6923	-5.15885	-3.78038	-5.55308	-1.43462	-3.10115
1EGX	-11652.8	-1.79538	-226.752	14.0692	86.2512	78.6154	0.204231	-1.34346	-3.23	-2.55731	-0.506538
1EIH	-6060.23	-1.28885	-124.347	8.72	84.6154	76.2	-2.52885	-2.26769	-3.69577	-1.64923	-1.58385
1EPH	-3760.33	-0.378077	-73.5592	17.8004	69.7596	56.9731	-4.12731	-3.02385	-5.17231	-3.76538	-2.03692
1EQ0	-17777.5	-1.77577	-329.401	22.4946	83.4562	75.3346	-0.976154	-0.298077	-3.65038	-1.22192	-1.57308
1EZO	-34330.8	-0.055	-629.141	29.375	70.4123	64.8269	-3.54962	-4.27154	-6.32077	-3.91154	-3.34346
1EZP	-34901.9	-0.163462	-643.116	30.1258	72.0942	65.3769	-3.24846	-4.11846	-6.07462	-3.91308	-3.23885
1F3Y	-17465.7	-1.86538	-341.015	22.0004	88.5077	79.9308	-0.542692	-1.31423	-3.53269	-2.20038	-1.24731
1F43	-4697.6	-1.58231	-103.115	23.5408	83.3135	75.35	-3.37615	-3.59577	-6.44615	-4.27692	-2.86462
1FAF	-7616.96	-1.47	-167.449	19.5719	92.4077	88.5615	-0.79	-0.870769	-2.04346	-2.23038	0.465769
1FCL	-4520.75	-1.65	-103.287	13.0131	90.9531	85.1538	0.859231	-0.469615	-2.74538	-2.61346	0.228846
1FDM	-3047.66	1.37615	-65.6285	21.1665	77.8042	70.4769	-2.29654	-1.04192	-4.80577	-3.05462	-1.58462
1FEX	-5512.66	-1.94115	-115.582	11.1119	84.2115	75.6038	-1.88077	-1.78538	-3.87	-2.65962	-2.06538
1FGP	-5501.81	-0.866538	-107.347	25.27	73.2462	59.9962	-1.72962	-2.78269	-4.58038	-3.40962	-2.60577
1FJD	-8501.27	-0.994231	-166.278	34.1077	74.9988	71.0615	-2.93577	-2.13077	-5.01808	-3.21654	-1.61615
1FME	-2142.05	-1.83346	-44.3731	6.18154	82.6938	75.7962	-2.86385	-0.991154	-3.99154	-0.382692	-1.64077
1FQQ	-2391.48	-0.269231	-47.6008	23.4804	64.7927	57.0423	-5.99846	-3.47423	-5.70269	-4.49885	-2.73154
1FR0	-12916.2	-1.98577	-281.413	13.3665	91.5573	85.0462	-0.0842308	-1.30231	-2.32	-2.27346	-0.671154
1FWO	-2033.25	0.135385	-38.7362	11.2508	73.7785	61.4	-3.89808	-2.30115	-4.88154	-3.27885	-1.91269
1G26	-2238.52	-0.192308	-43.2858	4.95808	87.9315	80.4538	-3.12846	1.26346	-2.23231	-2.27154	0.362692
1G2T	-6196.49	-1.23231	-121.809	8.05808	86.79	80.1	-2.59269	-1.97577	-3.71654	-1.83038	-2.20154
1G6J	-7510.54	-2.47538	-149.381	8.03038	93.1915	87.9923	0.795385	-0.0707692	-0.962692	-1.02423	0.855769
1G6M	-3316.01	-1.34577	-86.895	12.4685	80.8977	69	-3.23346	-2.41462	-4.08269	-2.47577	-1.36346
1G91	-6164.21	-0.820769	-120.914	6.35538	88.205	77.6038	-2.625	-1.76692	-3.13269	-1.36615	-1.80346
1G9L	-9422.12	0.600385	-183.549	27.2915	78.0331	66.2692	-4.47654	-4.17615	-5.32808	-3.28615	-2.36
1G9P	-2403.3	0.655769	-50.1008	10.465	82.8277	68.7538	-5.47231	-3.28962	-4.58308	-1.99	-1.71038
1GB1	-4840.07	-2.06308	-105.341	14.4838	89.8842	86.0769	1.085	-0.0846154	-2.17462	-3.08038	0.949231
1GB4	-5138.88	-1.73769	-108.547	14.3423	87.5535	82.2808	0.905	0.256923	-3.64654	-2.09115	-0.157692
1GD5	-13101.9	-0.775769	-253.972	16.9812	81.9415	74.45	-2.13692	-2.28423	-4.47385	-3.19962	-1.47885
1GE9	-18851.6	-1.57846	-420.731	18.2158	90.2165	86.6731	0.52	-0.333077	-1.15731	-2.45462	0.111154
1GGW	-12325.9	-0.917308	-243.404	17.1815	77.9542	71.4885	-2.02231	-1.87577	-4.23692	-3.03269	-1.45808
1GH9	-5035.3	-0.455385	-108.207	13.1846	83.1681	77.3	-3.11192	-1.82154	-3.69	-3.10692	-1.21308
1GHK	-6039.2	-0.803846	-112.906	14.4473	83.8165	75.7692	-1.38308	-0.0269231	-3.65423	-2.28	-0.651538
1GHU	-9840.05	-1.69077	-186.308	10.4396	88.1304	82.3115	-0.612692	-0.983462	-3.20846	-1.76346	-1.00692
1GJS	-5549.53	-0.549615	-118.781	9.13846	90.4773	83.6038	-1.33962	-0.663077	-2.37577	-1.69654	-0.793462
1GXE	-9143.22	-0.676538	-172.475	18.4442	76.6827	67.9346	-3.59846	-3.54654	-5.13385	-3.59038	-1.46231
1GYZ	-5942.01	-1.34654	-119.317	26.4042	82.6258	74.3577	-1.89115	-1.37962	-4.87115	-3.84923	-2.36
1H0Z	-4543.92	-1.61577	-105.27	12.7835	84.6135	75.2615	-3.11231	-2.67885	-3.68808	-2.375	-1.35154
1H2O	-15555.4	-1.43846	-312.613	19.3004	89.1962	81.4192	0.441154	-0.496154	-3.81269	-2.63885	-0.892308
1H3Z	-11066.9	-2.12423	-210.857	8.39846	93.5788	90.8654	-1.08423	-0.249615	-1.74692	-1.48462	-0.391154
1HA6	-5825.13	-0.479231	-112.262	16.765	84.5035	74.9385	-2.885	-2.67	-3.70885	-2.37692	-2.27115
1HA8	-4266.17	-2.25231	-91.2565	18.3762	81.5535	69.6269	-2.39346	-1.235	-4.02038	-3.83654	-2.71462
1HDL	-4304.66	-0.461154	-88.2712	18.9738	79.0288	71.9231	-2.44885	-3.03192	-4.00731	-2.84115	-3.07885
1HP2	-2657.64	-1.12269	-55.9792	12.075	87.1427	72.5577	-3.03577	-2.15385	-3.29846	-0.438077	-1.69885
1HP3	-1837.48	-0.0630769	-39.1115	11.86	85.7696	62.8654	-4.36923	-1.91923	-4.55577	-3.23308	-2.62769
1HPW	-9078.36	-0.338077	-178.242	19.3677	71.7142	58.1038	-2.66885	-2.59654	-5.43846	-3.14923	-2.11769
1HS7	-10053.1	-2.81192	-234.942	17.0565	92.9131	89.3423	1.56308	0.974231	-0.776538	-1.60423	0.0930769
1HVW	-1577.27	-2.46308	-34.7523	11.5619	93.4773	89.5846	-2.50423	0.681154	0.358462	-3.09423	-0.933462
1HX2	-3689.82	-0.721538	-75.2196	15.2462	84.7488	69.75	-3.15654	-2.35038	-4.10731	-2.365	-1.88077
1HZK	-9205.91	-1.28808	-178.553	10.475	89.1019	83.7038	0.281538	-0.548846	-2.81885	-3.41692	0.391923
1I25	-1837.28	0.777308	-42.9738	11.405	80.3288	69.9769	-3.56692	-0.806154	-4.31654	-0.126154	-1.77077
1I2U	-3146.43	-1.03	-65.8604	13.5304	85.5323	73.6269	-2.79731	-2.33731	-3.07577	-2.49077	-0.844231
1I2V	-3175.89	-0.491923	-66.0438	10.6196	86.6315	74.8346	-2.60654	-2.03923	-2.25077	-2.90615	-0.00692308
1I42	-7338.07	-0.354231	-142.307	28.4788	80.8146	73.9154	-1.52962	-2.97769	-3.30038	-4.42077	-2.34846
1I6C	-1972.39	-0.659231	-46.9408	15.335	77.5465	70.5885	-2.715	-2.49308	-3.61846	-3.93115	-2.03192
1I6G	-4465.7	-1.42192	-96.6323	9.27308	93.5692	84.9231	-1.80538	-1.25231	-1.58	-2.16154	0.367308
1IDL	-4538.08	-0.25	-90.3612	18.5738	60.5762	43.5115	-5.32038	-3.48462	-6.78115	-2.81077	-3.00462
1IE6	-1338.17	-0.521538	-35.9385	29.5535	75.8073	61.1346	-4.14731	-1.62577	-4.80731	-2.30038	-3.20962
1IEZ	-17486.8	0.0919231	-307.912	29.2469	58.8373	42.3462	-4.36038	-4.09346	-6.88923	-3.90615	-3.29
1IFW	-6814.84	-1.13654	-152.052	18.2415	84.9142	77.0231	-3.20115	-3.73192	-4.58462	-2.22885	-3.03538
1IG6	-10501.3	-1.46538	-213.442	15.2912	80.11	73.7192	-3.04423	-3.00654	-4.39	-2.44885	-2.24077
1IGL	-5276.96	-0.630385	-100.3	12.8212	72.5438	61.4654	-4.80154	-3.22077	-6.08	-2.69038	-3.29692
1IOX	-3367.88	0.263846	-66.2358	8.91885	82.7723	69.2192	-4.31538	-3.35769	-5.28962	-1.53846	-2.03885
1IP9	-7738.4	-1.44423	-153.351	13.0285	83.8754	77.2538	-0.0111538	-1.08577	-3.71423	-2.58923	-1.41385
1IRH	-4334.51	-0.943077	-91.9638	12.6288	82.4654	71.9231	-2.505	-2.42154	-4.96962	-1.57731	-2.45808
1IRZ	-6167.55	-1.50615	-125.043	7.62115	86.4158	79.4	-1.07	-0.556154	-1.87385	-0.793462	-1.25462
1ITF	-19630	-1.97077	-403.484	11.1481	89.0508	83.7038	-0.237308	-0.623462	-1.68654	-1.70269	-0.673846
1IVM	-13365.9	-1.64269	-259.988	16.3738	79.4477	70.15	-2.21	-2.89923	-4.33731	-3.24462	-2.28962
1IW4	-3768.79	-0.248077	-73.5646	19.5931	74.5281	60.4231	-3.32538	-2.82769	-5.56038	-4.58769	-2.52885
1IY5	-4278.16	-1.55269	-84.2169	10.5615	87.5731	75.5577	-2.10346	-1.18885	-3.00923	-1.32731	-1.52077
1IY6	-3924.28	-0.688077	-79.1846	19.2058	76.405	60.0231	-3.26385	-1.99423	-4.36269	-2.86423	-1.81462
1IYC	-1752.92	0.401923	-34.8281	27.1773	58.8227	45.7423	-5.85962	-3.62923	-7.15385	-4.06269	-3.19615
1IYY	-8766.99	-1.52885	-180.422	16.6823	76.205	67.3154	-1.99846	-1.88269	-4.47808	-3.25154	-1.23346
1J6Y	-9090.36	-0.653077	-185.342	18.9312	71.1862	62.1692	-3.53808	-2.95077	-5.29885	-3.77808	-2.00962
1J7M	-4774.85	-1.62423	-93.0696	10.7581	85.3458	81.5923	-2.54615	-2.39269	-2.63462	-1.02615	-1.50308
1J7Q	-6684.7	-1.30269	-146.922	42.7823	80.2185	76.0385	-2.82385	-3.94231	-4.92077	-5.44423	-1.94808
1J8C	-7487.12	-0.624231	-142.467	15.8954	69.5	57.9731	-3.64538	-3.09154	-6.02038	-3.17538	-2.52923
1J8K	-7636.33	-1.47769	-147.652	14.7865	79.0538	70.3538	-1.87962	-1.90808	-5.165	-3.12115	-1.29385
1JAS	-16078.8	-2.37615	-317.616	18.6196	84.8204	77.6	-0.788462	-0.963077	-2.935	-2.58154	-0.704615
1JC6	-4321.47	-0.289615	-91.055	14.6558	75.6408	65.0308	-4.31577	-3.68615	-4.95846	-2.56654	-3.00423
1JCU	-18099.3	-0.571538	-331.23	17.1581	72.0869	63.1423	-3.76269	-3.65423	-5.96962	-3.35538	-2.30731
1JE3	-6840.49	-0.192308	-140.339	20.165	72.8331	63.4385	-4.43231	-3.94346	-5.49885	-3.00846	-2.52846
1JE9	-3580.8	-0.990769	-90.2358	12.4035	81.2277	69.2231	-2.58269	-2.40231	-3.95231	-2.20231	-1.66308
1JFN	-8080.08	-0.328462	-159.563	14.4846	79.8158	67.1038	-5.06423	-4.04077	-4.22154	-2.74462	-2.24577
1JGK	-4465.1	0.05	-93.7446	19.6173	74.8785	60.4577	-2.84654	-2.83962	-5.38192	-2.24038	-2.20269
1JI8	-11020.4	-1.68077	-218.083	10.8788	82.0392	77.7923	-2.16269	-2.57577	-3.37577	-1.29846	-1.40077
1JJG	-7847.98	0.191538	-149.409	9.93846	77.8846	66.7654	-3.76885	-3.15115	-4.39231	-2.04769	-1.69808
1JKZ	-3664.33	-1.10615	-76.1196	12.8031	81.7319	72.9808	-1.38346	-2.47692	-2.99731	-1.47692	-2.04692
1JLZ	-1241.19	-0.807692	-28.97	6.43115	85.3485	77.6115	-3.00192	-1.67423	-2.57808	-0.890385	-0.138077
1JNJ	-9857.95	-1.62808	-186.832	10.1096	85.1669	76.7038	-1.00808	-1.28077	-3.73192	-2.93308	-1.42077
1JNS	-8198.95	-0.729615	-162.032	20.4108	77.8635	69.6923	-2.41038	-1.81769	-4.49269	-2.80038	-2.10577
1JO5	-3123.99	2.11577	-57.3404	6.83154	73.5788	63.6346	-4.58846	-3.60885	-5.57308	-2.00577	-3.02769
1JO6	-2186.26	0.511154	-49.2896	7.64077	82.6481	73.2577	-4.38962	-3.90038	-3.825	-1.49962	-2.10423
1JOR	-13735.8	-1.45923	-281.405	7.38154	88.3335	79.9115	-1.55115	-1.32808	-2.37615	0.459231	-0.945769
1JRJ	-2522.82	-1.63385	-62.9712	7.70615	91.2665	91.4885	-0.898462	1.22731	-1.52	-0.858846	-0.0457692
1JV8	-4701.19	-0.816538	-97.1585	9.28308	84.1342	78.2385	-1.78846	-1.34923	-3.08769	-0.621538	-2.045
1JW2	-6272.79	-0.666923	-128.145	15.2465	80.495	74.6	-2.62538	-2.56385	-4.585	-3.42192	-2.62346
1JW3	-13778.2	-0.397692	-257.753	24.6962	68.8965	58.2808	-2.36346	-2.40269	-5.75231	-3.68269	-2.57577
1JWE	-12617	-2.40885	-263.243	11.6142	91.725	88.1231	-0.0446154	-0.187692	-0.928462	-1.52	0.140769
1JYT	-12303.1	0.464615	-237.65	13.5165	83.3965	76.5077	-3.29192	-4.10192	-4.40423	-2.58346	-2.23654
1K0P	-1596.8	0.122692	-29.4015	47.7646	53.7127	28.5269	-6.99962	-3.22115	-7.49923	-5.10885	-4.69154
1K1V	-3288.85	-1.71077	-80.9677	9.46692	92.9988	90.0269	0.262692	0.471538	-1.535	-1.255	-0.212692
1K8B	-4035.68	-0.626538	-89.5565	24.5154	84.3846	83.9346	-1.66115	-0.345	-1.625	-2.86654	1.485
1K9C	-3335.27	-0.91	-73.9069	13.9265	80.5554	61.8	-5.15308	-3.87308	-3.97654	-2.44577	-1.795
1KGM	-1789.99	-0.965	-39.2927	11.7131	81.8196	68.6846	-3.85115	-0.649615	-4.31385	-2.41385	-1.10462
1KIO	-1763.82	-0.985385	-38.0642	15.4327	76.6919	65.7923	-4.02	-0.769615	-4.60731	-2.93346	-1.44808
1KJ0	-1649.94	-1.44423	-35.6212	20.9158	63.6396	54.4346	-5.09231	-2.22192	-6.28231	-2.95038	-1.79769
1KMD	-12012.7	-2.06846	-240.538	9.64308	88.4592	82.7654	-2.24231	-2.50231	-3.22769	-1.13192	-1.15308
1KOZ	-2554.35	-0.396538	-46.3327	8.95115	74.3208	48.7115	-4.12538	-2.61538	-5.565	-4.31346	-2.24962
1KQH	-2745.51	0.197308	-53.0942	16.8723	83.5473	75.3808	-4.35231	-2.63846	-3.80115	-2.03423	-1.95192
1KQI	-2773.38	0.145769	-53.6888	15.0673	83.975	72.5654	-4.135	-2.03192	-4.40308	-1.95192	-2.36269
1KRW	-12928	-1.18538	-252.758	17.0562	77.1777	71.9692	-1.72346	-2.77769	-4.82962	-3.23192	-1.71077
1KUN	-4266.1	-0.993846	-88.3335	10.5412	82.6915	73.8231	-2.74231	-2.645	-4.39577	-2.39577	-2.41615
1KV4	-2562.43	0.240769	-60.9427	8.68577	90.7692	85.7154	-1.08308	1.00692	-1.74192	-1.32654	0.283462
1L1I	-6346.36	-2.26269	-132.392	23.0338	74.8604	60.6923	-1.28577	-1.47923	-5.33615	-3.53885	-3.03308
1L3G	-10510.7	-0.766154	-212.052	17.0808	86.0788	80.0885	-2.27808	-3.02115	-3.24192	-2.98154	-2.00923
1L3H	-4711.82	-1.20962	-95.8631	11.8412	87.3619	77.6923	-3.22231	-1.05538	-2.35808	-2.12769	-0.194231
1L3Y	-2468.24	-0.771538	-48.9577	20.5392	76.5296	58.8923	-4.59885	-1.71154	-4.64077	-1.52385	-0.533077
1L7B	-7221.71	-1.05231	-154.603	17.5092	80.3427	75.7538	-2.30154	-2.77923	-4.71077	-3.07462	-1.165
1L7Y	-8560.55	-1.535	-163.895	6.56423	83.0273	78.3346	-1.47808	-1.85615	-3.10385	-2.36538	-0.195385
1LD6	-4219.06	0.0180769	-89.4246	7.79385	83.5846	73.6308	-2.76231	-1.66385	-3.91692	-0.0511538	-2.21885
1LFC	-1168.27	2.27923	-24.3562	15.18	71.9069	57.1269	-5.70346	-2.23846	-6.48423	0.204615	-2.75962
1LKJ	-14919.4	-1.835	-312.542	9.46808	88.7296	84.2423	0.331154	0.305385	-1.79385	-1.58462	-0.121923
1M2F	-15931.5	-1.83462	-299.728	9.55923	87.9988	80.9846	0.270385	-1.01115	-2.78577	-0.345	-1.13192
1M30	-4918.77	-1.88038	-94.9273	21.0277	76.7177	65.3923	-2.10077	1.205	-4.88962	-2.31346	-1.47462
1M5Z	-8512.05	-1.64615	-161.152	12.5023	86.9481	80.0269	-1.31846	-0.747308	-3.67077	-2.11038	-0.766538
1MB6	-2372.38	-0.315385	-48.8565	9.41154	86.4812	69.4769	-2.34769	-1.60423	-3.59269	-1.36038	-3.18731
1MG8	-7427.83	-1.48231	-139.176	17.7446	77.3273	68.3231	-1.45154	-1.78038	-4.29654	-2.38538	-0.560769
1MK3	-15250.2	0.0465385	-302.493	10.4062	77.1423	69.8885	-4.16577	-4.24654	-5.26077	-2.27538	-3.35269
1MMC	-1940.95	-1.19308	-38.3458	8.40538	88.4642	81.1731	-6.39962	-2.25231	-2.46769	0.0492308	-0.251538
1MNL	-7969.45	-0.864231	-161.191	23.9873	71.5642	57.8	-2.30154	-2.27269	-6.09846	-2.55423	-3.18269
1MPZ	-2447.39	-0.585385	-49.6785	35.5923	54.6346	39.7923	-5.45154	-3.40769	-6.92808	-4.17154	-2.98577
1MUT	-12429.6	-1.09538	-239.777	14.905	80.3746	71.15	-1.84538	-2.63192	-4.94923	-1.92808	-1.53462
1MZK	-11217	-1.33423	-211.532	21.9108	76.8269	66.7769	-0.426538	-1.82846	-4.44885	-4.50346	-1.61654
1N4I	-7249.15	-1.99154	-147.465	23.8469	70.4992	57.7385	-0.849231	-1.83231	-5.02	-4.15115	-1.63615
1N88	-8811.4	-0.963462	-172.731	21.1488	86.5381	78.4269	-1.33846	-1.71846	-3.19231	-2.08462	-0.178077
1NBL	-3339.74	-1.41115	-75.6469	23.1485	92.2169	86.9423	-0.909231	-0.713846	-1.30846	-3.595	-1.80077
1ND9	-3307.25	-0.851923	-73.3523	43.7681	78.8869	78.85	-2.17192	-2.46269	-5.03077	-4.20231	-1.89923
1NE5	-2932.56	-0.886923	-68.5123	13.8442	80	68.8038	-3.745	-1.50962	-4.36846	-3.34654	-1.34154
1NER	-7203.76	-2.05346	-144.019	10.9838	87.0738	75.5269	-2.50269	-1.88846	-2.94538	-0.891923	-1.10615
1NFA	-14612.8	-0.266154	-260.694	11.9719	72.0488	56.8731	-3.96231	-3.95	-5.63385	-2.47885	-2.21308
1NI7	-16789.8	-1.95462	-325.412	10.9527	89.3277	85.4808	-0.597308	-0.778462	-2.36615	-0.848077	-0.0257692
1NMV	-13348.1	-1.05769	-281.215	10.9473	88.7727	83.6269	-1.75038	-0.572692	-2.61654	-0.548846	-1.03692
1NOR	-3701.71	-1.28269	-95.0342	16.5423	88.3327	78.4615	-1.56423	-1.59269	-2.10308	-2.48846	-1.01808
1NWV	-9247.49	0.141923	-179.201	25.9173	69.5338	56.35	-4.73077	-3.20538	-5.07269	-3.84654	-2.09423
1NY9	-8207.47	-1.18962	-180.389	14.5238	87.8342	83.3731	-1.70077	-1.85846	-2.82077	-3.30923	-1.33038
1NYN	-9636.14	-1.53231	-193.889	7.91538	82.1454	76.4846	-2.37654	-1.59731	-4.21346	-1.20038	-1.04692
1O78	-5498.62	-0.294615	-95.5546	27.9308	66.9785	54.1769	-3.66615	-1.71731	-6.30808	-2.96615	-1.57577
1O8R	-7713.81	-1.25962	-150.783	21.9085	73.0769	68.8231	-3.235	-3.72769	-5.56692	-3.24346	-3.00231
1O8T	-4471.9	0.588846	-96.1677	8.13923	74.275	64.2308	-3.69846	-2.95192	-6.14846	-1.72462	-3.93962
1OCA	-17841.2	-2.12654	-336.841	9.75885	90.61	77.9962	-0.690385	-0.691154	-3.08077	-1.07115	-0.289231
1OJG	-12175.8	-0.968846	-219.481	20.9165	69.2592	58.0423	-3.53462	-3.10192	-5.81923	-3.49038	-2.63846
1OQ3	-6641.43	-1.29846	-132.266	12.5865	87.2138	79.3577	-1.17115	-2.06923	-3.19885	-2.24538	0.0473077
1ORX	-1543.31	-1.47885	-28.8542	18.4008	83.39	70.4423	-3.37154	-1.82077	-4.825	-4.65962	0.660385
1PBU	-20522	-2.48962	-384.441	18.7519	86.2981	76.2692	-0.728077	-1.61269	-3.76846	-2.77192	-1.81615
1PLO	-10115.7	-0.853846	-195.735	13.2204	76.9227	63.65	-1.77808	-2.95923	-4.85846	-3.04962	-3.20923
1PMC	-1834.04	-0.799615	-39.2038	11.1512	80.7685	70.1692	-4.14192	-0.958846	-3.03769	-1.34808	-0.549231
1Q27	-14761.4	-0.423462	-293.571	15.6531	75.8531	66.4769	-2.285	-2.83692	-4.61385	-2.64808	-2.03692
1Q2K	-2010.37	0.0915385	-46.5031	17.1888	88.7254	83.2038	-0.785769	-0.715769	-2.62654	-1.98692	0.570769
1Q2N	-5217.81	-2.40962	-122.447	9.54308	91.6212	87.8885	0.549231	0.608462	-1.40731	-1.90769	-0.471154
1QFD	-2223.01	-1.42808	-45.0815	14.5073	81.6662	72.5923	-5.25885	-1.20385	-3.09538	-2.61731	-1.18462
1QHK	-3742.33	-1.30885	-79.9004	16.2158	81.5373	72.5962	-1.67654	-1.57538	-4.21654	-2.36923	-0.709231
1QK6	-1999.47	-0.318846	-40.1419	10.8808	67.2462	50.5769	-5.12654	-2.80885	-6.09385	-2.45538	-2.34154
1QK7	-2255.59	-0.136923	-43.6173	9.32346	79.7431	65.6923	-3.94615	-2.13769	-4.54154	-2.76038	-1.23731
1QKH	-6087.85	-0.711154	-115.436	20.5423	78.0604	68.4385	-2.88346	-3.05077	-5.09115	-3.68192	-1.56846
1QQV	-5352.9	-1.13115	-109.176	19.2481	87.2792	80.5808	-1.98269	-1.88769	-4.02462	-3.67115	-1.33692
1QU5	-16528.4	-0.841538	-318.183	19.6158	77.1154	65.8038	-2.05692	-2.20462	-4.72692	-2.29423	-1.72385
1R63	-6082.16	-2.62769	-131.295	6.94462	92.8108	89.8692	-1.20346	-0.553077	-1.68923	-1.82577	0.336923
1ROO	-2573.35	-0.706538	-51.905	15.5496	78.5565	74.3038	-3.09308	-2.18692	-5.87308	-2.40885	-5.31538
1SPY	-8819.53	-2.10308	-179.258	10.5462	88.3273	83.0538	-0.792308	-0.898077	-2.92038	-1.05308	-0.181154
1TFS	-4298.86	-0.529231	-91.5254	10.18	85.6773	77.5846	-2.39808	-1.73269	-3.235	-2.63615	-1.83962
1TIH	-3470.09	-0.995385	-70.1804	10.0208	83.1827	70.35	-3.05231	-2.25462	-5.09731	-3.09192	-0.901923
1TLE	-3731.38	-0.662308	-73.9962	9.22923	81.3181	61.7885	-4.17962	-3.05615	-4.23115	-2.16577	-1.66962
1TNW	-14161	-0.753462	-308.001	12.3892	88.3177	85.6115	-0.646538	-1.30192	-2.78962	-2.45308	-0.931154
1TOF	-11886.8	-1.45077	-234.97	12.5973	86.0135	80.45	0.990385	-0.826154	-3.89885	-2.23038	-0.829615
1UGL	-2651.3	-0.266538	-63.455	24.4404	74.1185	60.4885	-4.94385	-3.71923	-6.31231	-2.96385	-3.37192
1VTP	-1483.66	-0.898462	-35.1819	8.16038	91.8262	84.6308	-0.938077	-0.696538	-2.17731	-2.10808	-1.33154
1WKT	-7817.12	-1.71385	-150.87	10.0427	88.5496	75.1654	-1.32308	-1.73769	-2.36385	-2.64385	-0.654231
1ZAQ	-3043.49	-0.222692	-53.3912	15.6838	65.8427	51.3231	-5.30462	-1.87885	-6.47731	-2.015	-2.74615
2BBG	-2940.45	-1.15346	-61.6585	15.8446	83.4023	73.3231	-3.41346	-2.84808	-3.78231	-3.85577	-2.49769
2CPB	-3188.22	1.17038	-75.8577	10.0915	90.0642	87.4654	-0.277692	1.05077	-2.06192	-2.62038	0.577692
2CPS	-3060.77	1.35	-72.8154	11.5331	91.6673	89.1654	-0.539615	0.481538	-2.72615	-3.21346	-0.0423077
2EZL	-9502.93	-1.55692	-201.573	7.47923	91.5946	88.0231	-1.73654	-1.48885	-2.66385	-1.50846	-0.706538
2HID	-8287.62	-2.18808	-164.762	9.49538	93.1665	86.7962	1.16808	-0.296538	-1.39462	-1.39231	0.156154
2IGG	-4844.61	-1.49885	-108.733	10.8312	86.2912	82.0692	-0.681538	-1.23731	-3.46538	-3.35154	-0.637692
2IGH	-4840.59	-1.55	-107.314	11.095	88.8546	84.6	-0.325769	-0.845	-2.81769	-3.39077	-0.610769
2KTX	-2539.73	-1.43192	-52.5135	18.9604	78.6323	68.2	-3.60731	-2.08385	-5.73231	-2.08923	-2.11769
2LFB	-8262.85	-1.29192	-183.857	8.365	83.7927	76.5769	-2.81038	-1.87846	-3.33269	-1.95615	-1.05654
2MOB	-8583.71	-0.538846	-162.226	19.4323	81.1869	72.5615	-0.734615	-2.01231	-5.20308	-3.14269	-2.23269
2PTA	-2392.44	-1.63	-52.8408	7.39731	88.6954	77.8769	-3.53538	-2.82154	-3.21769	-0.664231	-3.18154
2R63	-6079.15	-2.46885	-129.032	6.91462	92.4323	87.6654	-1.14192	-0.849615	-2.00462	-2.76385	-0.0834615
2SOB	-8019.81	-0.527308	-148.298	18.5173	71.2896	57.3	-3.49231	-3.51231	-5.88654	-2.44385	-2.47808
3BDO	-7083.84	-1.04346	-124.098	18.7515	74.7115	59.3192	-2.04423	-0.0273077	-5.34154	-3.21692	-1.67269
3GB1	-4868.32	-2.09692	-109.983	8.59462	92.5931	90.6923	1.65269	0.89	-1.22654	-0.568077	1.00385
3HSF	-9594.78	-2.14	-183.713	8.82654	84.7438	74.2231	-1.25923	-1.9	-4.005	-0.684615	-2.53538
3PDZ	-7645.26	-1.39731	-143.078	28.3738	73.8546	64	-2.27346	-1.72962	-5.56077	-4.25731	-1.43846

## Sheet: CYA
CYA	DOPE_score	Normalized_DOPE	Dfire	Clashscore	RAMA_perc	PRO_favoured	WHA_1st	WHA_2nd	WHA_Ram	WHA_chi	WHA_Back
1A57	-8170.15	0.34	-149.452	47.13	48.2817	32.5667	-4.9675	-3.9	-7.88	-7.24583	-1.99167
1A5J	-7788.79	0.06	-164.956	71.6356	57.5552	54.004	-4.5576	-3.9316	-7.6852	-7.0616	-2.0408
1AB7	-9653.27	-1.8084	-188.158	57.904	76.2744	72.056	-1.7364	-2.5832	-6.0348	-7.6456	-0.7208
1AF8	-6733.29	-0.1644	-139.986	37.8712	61.8572	71.408	-3.59	-3.1572	-8.0632	-7.96	0.4532
1AH9	-4962.52	-0.0052	-86.6968	132.33	59.7096	45.22	-4.2552	-2.876	-7.162	-7.6924	-1.9016
1AHL	-3059.71	-0.3584	-58.168	51.93	71.66	60.116	-6.0968	-4.4092	-5.9492	-7.4408	-1.4768
1AJW	-13853.4	-1.0364	-258.503	54.2368	71.7216	57.708	-1.9492	-2.816	-6.8416	-7.1276	-1.4004
1ALG	-893.014	1.7772	-16.3928	36.2028	52.7284	48.884	-7.0892	-4.9972	-8.1376	-7.9876	-2.5676
1APF	-3242.4	-0.6232	-62.7696	69.168	77.532	59.06	-6.44	-3.828	-5.8968	-7.4084	-1.55
1AZJ	-1763.46	0.3784	-33.176	169.421	66.0016	43.076	-5.516	-2.5148	-6.2376	-7.1792	-2.0364
1B1V	-1103.27	0.2044	-20.2996	29.0176	67.0472	41.236	-7.3844	-2.9704	-7.3732	-6.0364	0.8224
1B22	-3916.78	0.7824	-84.9112	106.616	50.9408	41.928	-4.7788	-4.358	-8.2848	-7.8912	-3.8276
1B3C	-4656.15	-0.5172	-95.0072	44.4216	75.1616	65.68	-5.468	-3.2852	-5.5148	-7.7612	-0.4232
1BA4	-1433.94	2.6092	-30.4524	30.2344	53.0516	44.392	-7.7252	-4.088	-8.3712	-7.2008	-1.6772
1BAL	-2720.21	0.3504	-56.0764	20.5668	72.0828	60.628	-5.93	-3.5584	-6.1852	-7.336	-1.242
1BCN	-13213.9	-1.1516	-274.798	28.6132	75.4208	70.836	-1.81	-2.4532	-6.6516	-7.6692	-0.8484
1BCT	-4852.04	2.2944	-100.886	46.3088	78.6852	89.12	-1.2692	0.4328	-7.2676	-6.7	1.0256
1BEG	-8680.61	-0.6516	-174.012	24.8368	76.1668	73.808	-1.7308	-2.4556	-6.6244	-6.8136	-0.9272
1BGK	-2508.89	-0.3384	-53.974	82.8236	65.1424	63.516	-3.6128	-2.8284	-7.1532	-6.786	-3.1488
1BH4	-2004.59	0.2796	-35.2368	43.4504	57.2856	33.504	-5.2056	-3.0792	-7.6968	-7.2444	-1.7144
1BLJ	-9484.45	-0.1636	-183.208	139.538	72.6072	63.16	-3.0928	-2.8924	-6.3264	-7.4888	-1.9464
1BLQ	-6592.17	-0.024	-138.962	36.2296	65.5464	73.156	-2.7984	-2.8792	-7.8672	-7.7068	0.0908
1BLR	-10225.4	0.2304	-212.039	96.24	64.8888	54.616	-2.2728	-2.6456	-7.098	-7.2652	-1.412
1BNB	-2436.47	-0.0992	-46.834	89.93	73.1104	65.368	-5.55	-3.7552	-6.37	-7.286	-0.656
1BQZ	-5283.98	-0.2656	-113.566	53.848	66.2932	58.516	-4.642	-4.14	-7.5904	-7.8384	-2.0424
1BSH	-11498.2	0.1192	-230.352	32.632	72.9708	67.504	-3.4392	-2.4348	-6.9152	-7.848	0.1204
1BY0	-1412.51	-0.5364	-45.4432	19.0704	80.64	81.004	-2.0252	-2.4068	-1.644	-8.6956	-0.0856
1BYM	-6414.89	0.344	-119.524	51.2204	61.1372	48.568	-4.99	-4.1956	-7.5	-8.0604	-2.3976
1BZG	-1357.85	2.9028	-34.1416	113.857	55.75	52.128	-5.2156	-4.1644	-7.7284	-8.6868	-2.8264
1C06	-15670.1	-1.0712	-301.352	24.3248	74.7764	69.624	-3.1712	-2.7304	-6.48	-6.9516	-0.534
1C49	-2165.06	-0.9992	-50.178	35.1456	83.3956	67.456	-4.3168	-3.6516	-5.7168	-7.5392	-3.5412
1CE3	-3007.79	-0.0592	-65.982	57.4776	64.23	49.772	-5.1056	-2.9288	-6.6	-7.01	-0.7256
1CEJ	-5440.6	-0.5148	-120.843	59.4716	65.618	48.928	-4.8104	-3.3852	-6.1268	-7.2428	-2.3544
1CFE	-11358.1	-0.6476	-231.412	34.006	76.782	69.148	-3.7572	-2.9776	-6.1824	-6.9364	-0.2816
1CKY	-1058.24	2.3156	-19.0532	54.6888	30.0012	8.572	-10.1768	-4.8724	-9.4156	-7.0472	-4.016
1CMF	-5730.88	-1.1896	-119.555	130.752	63.2684	62.06	-3.1896	-3.6048	-7.2916	-7.864	-2.7364
1CMG	-5260.06	-0.7332	-114.985	53.9348	78.0848	75.092	-2.4592	-2.49	-6.5868	-6.616	-0.6884
1CN7	-9822.41	-0.7484	-195.427	40.1948	71.1384	66.824	-2.4788	-2.6196	-6.8012	-6.86	-0.314
1CW5	-2476.76	0.1932	-51.36	22.7232	60.0876	59.476	-6.1076	-2.5288	-7.8536	-6.7968	-0.0064
1CW6	-1956.41	0.6352	-40.884	21.2132	65.5996	64.768	-5.4012	-2.3384	-6.5744	-6.3616	0.972
1CX1	-13422.4	-0.7228	-241.402	70.1108	69.8804	54.712	-3.2652	-3.6416	-6.3392	-7.3904	-1.3792
1CXR	-2856	0.3044	-57.9392	68.9824	63.7272	59.556	-4.6472	-3.0792	-7.4576	-6.6052	-3.3308
1CZ5	-14625.3	-0.1964	-290.144	58.4392	73.1588	58.724	-3.9172	-3.978	-6.7764	-7.6444	-1.4168
1D0R	-1726.12	0.824	-38.616	15.808	68.7156	76.48	-3.6676	-0.982	-6.6712	-6.9556	0.0592
1D1N	-7616.78	-0.0532	-138.676	103.727	57.0308	44.324	-4.0972	-1.6076	-7.6848	-7.498	-1.9156
1D1R	-5661.23	-0.2932	-122.554	18.2916	71.8016	70.5	-4.26	-3.4716	-6.2752	-8.156	0.8948
1D2B	-11570.1	-0.2728	-215.037	126.558	73.8704	65.636	-3.2212	-3.2172	-6.276	-7.6656	-1.7688
1D5V	-9104.21	-1.0104	-169.486	35.9476	70.8268	70.464	-3.9336	-2.2772	-6.7424	-5.7608	-1.0908
1DBY	-10467.3	-1.1664	-196.131	57.1572	74.6284	69.288	-2.0332	-3.5468	-7.0956	-6.6568	-1.414
1DC2	-11182.9	0.5144	-235.263	70.1264	58.702	56.376	-4.954	-3.9872	-8.0572	-7.9084	-0.9368
1DCJ	-6680.73	-0.6348	-139.178	145.398	76.76	68.724	-2.052	-1.7756	-5.4668	-7.4824	-1.2276
1DE3	-12890	-1.6256	-254.225	36.588	72.5668	61.612	-3.738	-3.3656	-5.99	-7.0528	-0.9316
1DKC	-1944.29	0.4296	-40.5572	53.7172	52.2224	37.852	-7.634	-3.4572	-7.3352	-7.7432	-2.0768
1DMO	-13543.3	-1.314	-281.025	151.095	69.89	71.476	-1.6352	-1.5348	-6.7896	-7.9108	-0.3684
1DSK	-1577.43	2.9036	-32.6392	45.5748	78.9232	70.488	-6.0968	-2.9552	-7.418	-7.0164	-1.444
1DU2	-4075.04	1.8272	-81.1156	46.3292	56.1624	48.176	-7.5036	-6.1356	-7.9816	-8.0684	-3.5072
1DU9	-1406.35	-0.9312	-29.6864	39.2652	83.5408	66.1	-5.636	-2.2772	-5.3268	-7.5604	-2.8344
1E0G	-3752.73	-1.3	-73.076	77.4736	85.1308	80.184	-3.1572	-2.0052	-4.3428	-7.3008	-0.4276
1E8L	-11638.2	-0.8396	-230.109	61.598	66.046	59.824	-4.0992	-2.9324	-6.9612	-6.7548	-1.8532
1E9T	-3564.1	0.1912	-71.942	113.107	63.7888	54.048	-5.6768	-3.5552	-6.4472	-7.1804	-1.57
1EFE	-4244.45	0.834	-74.7856	41.2248	45.7924	38.124	-7.7244	-5.03	-8.402	-7.2824	-1.8572
1EGX	-10741.5	-1.018	-204.141	43.1264	73.4876	61.68	-2.2092	-2.7504	-6.6116	-7.0832	-1.2044
1EIH	-5598.05	-0.658	-114.036	33.0632	72.8444	58.792	-4.5388	-3.2344	-6.1964	-6.9428	-1.132
1EPH	-3187.36	0.572	-63.3904	114.703	53.6456	45.948	-5.8152	-3.7844	-7.0752	-7.5508	-1.4668
1EQ0	-16951.7	-1.1568	-308.14	100.433	73.3332	62.672	-2.4864	-1.1628	-6.1028	-6.9008	-1.3924
1EZO	-33319	0.3992	-636.839	59.4804	73.2292	69.084	-4.242	-4.5872	-6.7828	-7.9204	-1.746
1EZP	-33738.6	0.3196	-646.516	63.1632	73.2612	69.308	-3.9576	-4.5536	-6.6792	-7.934	-1.5816
1F3Y	-16052.2	-1.0316	-312.777	84.4024	76.4656	66.052	-2.07	-2.3024	-6.4788	-6.8696	-1.014
1F43	-4232.26	-0.888	-95.2784	101.278	66.4408	65.864	-4.4136	-4.164	-7.5652	-7.9164	-2.2296
1FAF	-7061.36	-0.7568	-152.226	71.118	82.5452	84.38	-2.742	-2.7068	-6.0604	-7.932	0.7132
1FCL	-4041.7	-0.8812	-91.7472	46.6504	78.0756	70	-1.49	-2.0912	-6.2084	-6.9424	0.2968
1FDM	-2601.41	2.2372	-54.816	101.477	57.8328	59.34	-3.792	-2.6652	-8.1248	-7.5252	-2.2896
1FEX	-4941.27	-1.0684	-101.93	44.478	70.4564	65.744	-3.4432	-2.9012	-7.826	-7.0312	-1.6064
1FGP	-4913.61	-0.0832	-98.9884	105.124	62.648	50.736	-3.0776	-3.5204	-7.326	-7.2732	-2.574
1FJD	-7347	-0.016	-144.62	143.522	58.468	55.604	-4.6996	-3.2116	-7.5376	-7.8484	-1.808
1FME	-1992.67	-1.3124	-39.5632	26.1896	58.9232	54.664	-4.624	-1.6484	-7.1064	-7.2448	-1.3888
1FQQ	-1951.39	0.6444	-41.0952	106.907	53.3332	42.264	-7.0436	-4.3088	-7.5424	-7.9916	-2.8772
1FR0	-11663.8	-1.0636	-250.062	45.8252	74.9924	79.5	-1.4692	-2.5912	-7.2928	-7.7652	0.0928
1FWO	-1840.67	0.6952	-34.33	43.32	54.7904	39.996	-5.5896	-3.2308	-7.0464	-6.9396	-2.1452
1G26	-1978.32	0.598	-38.6404	40.5424	74.2076	64.528	-5.2356	-0.4372	-4.9604	-7.4584	-0.2996
1G2T	-5588.21	-0.4284	-110.455	36.4272	73.448	65.144	-4.4892	-2.9648	-6.6628	-6.57	-1.9512
1G6J	-6940.28	-1.7624	-137.19	26.3192	92.1068	87.516	-1.5624	-2.32	-3.158	-7.4196	1.3076
1G6M	-2700.67	-0.5448	-74.1412	39.6908	64.0668	49.6	-6.3948	-3.258	-6.4944	-6.7012	-1.7348
1G91	-5729.74	-0.2268	-112.319	28.8908	83.6808	70.384	-4.326	-2.8472	-4.696	-7.0816	-1.5056
1G9L	-8294.27	1.364	-163.738	100.194	69.2952	54.492	-6.4776	-4.6136	-7.494	-7.8016	-2.1044
1G9P	-2122.03	1.2776	-44.7124	37.6184	72.5576	56.116	-6.938	-4.5392	-6.2616	-6.8468	-1.3548
1GB1	-4452.39	-1.4088	-99.906	52.396	89.334	83.36	-0.5356	-1.9352	-4.6876	-6.882	0.6604
1GB4	-4650.18	-0.944	-96.0984	47.0532	74.182	64.064	-1.6204	-2.124	-7.5044	-6.842	0.3352
1GD5	-11806.9	0.1856	-229.561	65.7792	80.3116	69.94	-3.5116	-3.2532	-6.282	-7.8184	-1.2116
1GE9	-18378.5	-1.1696	-415.788	31.9656	91.1	87.168	0.2084	-0.7444	-1.6836	-7.4472	0.766
1GGW	-11470.6	-0.2728	-224.479	65.612	67.3632	64.748	-2.9052	-2.9212	-6.5496	-7.4764	-1.2804
1GH9	-4719.99	0.0428	-100.098	41.6588	70.0288	68.824	-4.9988	-2.438	-6.2516	-7.6268	-0.5472
1GHK	-5705.87	-0.3212	-104.239	38.8488	74.3376	61.08	-4.1168	-2.4232	-5.8956	-6.696	-0.576
1GHU	-8737.32	-0.642	-167.902	29.6104	78.582	70.12	-3.088	-2.9368	-6.2152	-7.2584	-0.5956
1GJS	-5023.48	0.244	-103.946	32.9472	69.714	68.596	-3.582	-2.4252	-7.39	-6.2908	-0.0648
1GXE	-8740.62	-0.2856	-165.893	40.5188	75.4392	63.224	-5.5476	-5.1812	-5.8884	-7.3204	-0.7036
1GYZ	-5114.31	-0.1432	-103.744	125.755	70.6204	65.708	-3.2776	-2.8432	-7.3004	-7.8652	-1.0432
1H0Z	-4072.7	-1.0016	-94.9764	46.59	76.9692	66.28	-4.7324	-3.8508	-6.2724	-7.1064	-0.3208
1H2O	-14108.7	-0.574	-287.485	83.2608	83.9992	71.796	-1.118	-1.6208	-5.5904	-6.8688	-0.8452
1H3Z	-10589	-1.6064	-201.95	52.6168	92.0384	87.548	-1.842	-1.22	-2.9788	-6.4428	-0.2264
1HA6	-5406.62	0.1604	-103.976	68.7536	72.942	58.744	-4.2408	-3.618	-6.2428	-7.5868	-1.672
1HA8	-3877.67	-1.5656	-79.8368	86.1592	60.7336	51.48	-3.2156	-2.6488	-7.5536	-6.4108	-1.144
1HDL	-3779.14	0.4188	-78.9884	68.834	62.1876	59.92	-3.9288	-3.6172	-7.6176	-7.9616	-3.1424
1HP2	-2413.25	-0.4964	-51.046	38.3292	73.1432	58.624	-4.802	-3.3004	-6.0888	-7.328	-2.2936
1HP3	-1736.98	0.32	-36.2008	54.45	75.7336	49.544	-5.7024	-3.1308	-6.6552	-7.086	-1.7512
1HPW	-8091.39	0.3904	-161.286	47.4308	61.0396	50.492	-4.5128	-3.7492	-7.4076	-7.1124	-0.9512
1HS7	-9606.07	-2.3044	-221.788	42.1912	91.1996	88.076	0.3388	-0.7824	-4.3688	-7.1172	0.482
1HVW	-1479.09	-2.1052	-32.2504	36.8084	78.7828	60.452	-3.8812	-0.4724	-3.0816	-6.314	-0.6088
1HX2	-3347.51	-0.1728	-67.8604	58.2564	73.862	50.744	-4.958	-3.3936	-6.5976	-6.4244	-2.2556
1HZK	-8528.04	-0.6676	-166.865	32.0908	80.7412	72.924	-2.562	-1.9888	-4.7888	-6.5056	0.0292
1I25	-1674.28	1.2616	-39.7768	10.3876	70.5132	59.616	-5.576	-2.3836	-6.3972	-7.1072	-1.9896
1I2U	-2872.39	-0.4268	-60.4092	43.2952	70.096	59.196	-4.9504	-3.5796	-6.1328	-7.7072	-0.4476
1I2V	-2866.7	0.1896	-58.5256	38.0728	74.0004	57.708	-4.6668	-3.8952	-6.5256	-7.5524	-0.45
1I42	-6741.66	0.3388	-134.073	106.988	75.722	70.54	-2.7464	-3.9228	-5.056	-8.1884	-1.3056
1I6C	-1606.55	0.1228	-41.0752	88.6932	58.3776	46.844	-4.6648	-3.2532	-6.472	-7.5352	-1.932
1I6G	-4231.53	-0.9912	-90.62	24.038	87.6564	77.652	-3.3276	-2.2532	-4.5424	-6.7528	0.4236
1IDL	-3843.01	0.5792	-79.3812	55.262	44.8892	31.808	-7.4424	-5.042	-8.2752	-7.2696	-3.0588
1IE6	-1082.37	0.1208	-33.1016	80.8504	62.1928	50.572	-5.8196	-2.7764	-5.9588	-6.7852	-3.474
1IEZ	-15508.1	0.9696	-274.178	72.1948	48.2792	32.4	-6.7844	-5.4176	-8.096	-7.9632	-3.2184
1IFW	-6099.04	-0.4212	-135.531	72.028	64.534	59.416	-4.9576	-4.7132	-7.9264	-7.5904	-1.5516
1IG6	-9884.13	-0.8352	-200.332	50.0164	72.266	70.044	-3.8612	-3.6792	-6.412	-7.8508	-1.3076
1IGL	-4720.45	0.1556	-88.8796	62.6284	60.3688	49.412	-6.4148	-4.2148	-7.8	-7.2044	-2.1532
1IOX	-3010.06	0.9708	-60.4948	36.5148	76.4168	60.564	-6.4584	-4.332	-5.8184	-7.1676	-1.2012
1IP9	-7246.99	-0.8352	-144.724	50.11	76.4332	67.968	-1.374	-2.0608	-6.1988	-7.2976	-1.506
1IRH	-4120.58	-0.5324	-84.7764	33.626	71.5264	54.08	-4.4512	-3.7228	-7.07	-6.8516	-1.7872
1IRZ	-5608.61	-0.6748	-113.075	30.2592	83.8708	75.612	-2.6124	-1.3068	-4.4636	-6.2896	-1.3096
1ITF	-18494.1	-1.2248	-378.838	31.0304	83.9516	79.736	-1.3548	-1.7044	-4.6896	-7.0068	-0.1704
1IVM	-12209.1	-0.7868	-238.364	54.2072	69.8128	65.744	-3.6932	-3.4096	-6.6444	-7.5964	-2.1292
1IW4	-3394.15	0.4172	-67.3316	79.5472	63.546	53.876	-4.74	-3.7376	-7.5072	-8.066	-2.3748
1IY5	-3869.9	-0.8548	-77.0676	54.7632	81.1552	67.644	-3.9008	-2.3608	-5.1284	-6.06	-2.0952
1IY6	-3196.18	0.444	-68.7332	158.4	65.8464	50.952	-4.4148	-2.7116	-7.226	-7.174	-2.4404
1IYC	-1307.28	1.4324	-29.2428	109.027	43.884	32.424	-7.1264	-5.3516	-8.9216	-7.9604	-3.4592
1IYY	-7733.65	-0.6476	-159.189	59.5744	62.2748	49.676	-4.4064	-3.6796	-7.14	-6.6776	-2.0368
1J6Y	-7982.59	0.1884	-158.914	53.7644	51.6272	46.944	-5.708	-4.6012	-7.9868	-7.3716	-2.484
1J7M	-4320.6	-0.928	-84.8936	51.3732	70.8272	58.732	-4.5716	-3.2824	-6.058	-6.2644	-1.8596
1J7Q	-6052.42	-0.6148	-132.274	174.184	62.9056	63.688	-3.6424	-4.5812	-7.2564	-8.1844	-1.5496
1J8C	-6920.54	-0.0544	-128.421	45.1432	57.31	42.644	-5.928	-4.2796	-7.6528	-7.5868	-2.6812
1J8K	-7148.54	-0.9392	-138.945	33.152	71.8276	62.612	-4.1656	-3.6116	-6.0168	-7.3624	-1.106
1JAS	-15005.6	-1.6708	-289.441	54.1184	71.6804	64.428	-2.388	-2.5744	-6.78	-7.164	-0.49
1JC6	-3873.33	0.3756	-83.7028	43.2664	63.3016	50.968	-6.0444	-4.7888	-7.0656	-7.5012	-2.5688
1JCU	-16201.3	0.2992	-294.297	63.5232	60.6024	49.892	-5.8052	-5.0372	-7.634	-7.7732	-1.9072
1JE3	-6093.06	0.544	-126.448	73.2308	62.6952	49.816	-6.6396	-5.1876	-7.9192	-7.6904	-2.382
1JE9	-2974.09	-0.1592	-75.374	57.1556	58.3724	39.54	-5.1852	-3.1464	-7.2996	-6.682	-2.2544
1JFN	-7395.7	0.258	-147.439	43.0836	72.4092	59.8	-6.8864	-5.2052	-6.0616	-7.2884	-1.766
1JGK	-4118.24	0.6144	-88.4792	46.4628	68.1888	54.728	-4.528	-4.046	-6.4636	-7.5544	-1.7216
1JI8	-9993.35	-0.8112	-198.198	23.9044	70.2384	67.704	-3.4728	-3.8096	-6.5288	-7.5208	-1.03
1JJG	-6900.85	1.0744	-132.661	37.2884	65.36	57.988	-6.7	-4.6992	-6.2084	-7.8632	-1.6744
1JKZ	-3288.24	-0.346	-68.1864	63.4712	64.91	63.984	-3.4112	-3.6348	-6.0504	-6.0804	-2.07
1JLZ	-1135.53	-0.3628	-26.716	17.9124	73.5232	58.34	-5.1248	-2.3476	-5.9452	-7.1864	-1.5272
1JNJ	-8851.72	-0.7012	-166.604	43.9256	68.9412	55.012	-4.076	-3.0576	-6.5632	-7.8028	-1.942
1JNS	-7528.77	0.01	-147.222	86.3404	59.8228	55.356	-4.4448	-3.1208	-7.4176	-7.6912	-1.4392
1JO5	-2535.84	3.2528	-41.5724	31.7372	50.87	35.724	-7.8696	-5.0944	-8.2528	-7.9688	-3.0936
1JO6	-1725.81	1.3948	-38.2896	43.9732	57.5816	52.092	-6.9628	-5.2668	-7.2132	-7.588	-3.0052
1JOR	-12560.8	-0.6988	-256.26	25.4988	79.318	67.408	-3.8276	-3.1852	-5.4472	-6.7668	-0.8712
1JRJ	-2370.95	-1.2388	-57.7852	18.468	84.6476	85.992	-2.276	0.552	-6.1688	-6.5268	2.7188
1JV8	-4404.48	-0.2572	-91.8768	47.7316	79.7136	69.276	-2.8576	-2.884	-4.3996	-6.4668	-1.4888
1JW2	-5556.57	0.2564	-109.128	64.0788	61.6576	58.772	-4.3908	-3.6396	-7.9044	-8	-2.3096
1JW3	-12246.9	0.6408	-225.266	96.8904	46.608	37.512	-4.5048	-3.6664	-8.3308	-8.0744	-2.7796
1JWE	-11705.3	-1.624	-238.365	34.0396	86.9996	82.068	-1.7232	-1.7636	-4.7032	-7.0708	0.7428
1JYT	-10850.8	1.3296	-212.657	41.792	76.274	69.18	-5.35	-5.8064	-6.0708	-8.0276	-1.386
1K0P	-1438.96	0.6336	-28.35	199.267	39.724	16	-8.0988	-4.1148	-8.8196	-8.0384	-5.5656
1K1V	-3072.22	-1.1768	-71.5348	42.6864	87.1796	86.5	-1.9036	-0.9232	-5.964	-8.0384	-0.8252
1K8B	-3437.15	0.384	-78.6848	138.152	73.52	78.852	-3.2876	-2.7256	-4.62	-8.1796	0.6452
1K9C	-2777.53	-0.284	-65.57	51.2364	61.7224	42.144	-6.5032	-4.922	-7.298	-7.0028	-2.5852
1KGM	-1536.73	-0.3468	-33.988	35.0628	66.67	49	-6.2764	-2.5364	-7.354	-6.9924	-2.1452
1KIO	-1533.81	-0.4168	-33.062	41.3988	55.396	40.296	-6.3616	-2.4196	-7.2584	-7.1068	-2.2496
1KJ0	-1323.21	-0.7072	-31.182	65.02	46.544	34.468	-7.2516	-3.3688	-8.26	-6.7648	-1.878
1KMD	-10841.5	-1.1516	-218.901	30.1656	84.7672	77.924	-4.0216	-3.9792	-5.6696	-7.1228	-0.8652
1KOZ	-2332.81	0.224	-42.1208	56.5088	63.8828	47.472	-5.3128	-3.0316	-6.6304	-7.7556	-2.646
1KQH	-2364.28	1.1208	-47.2484	77.8344	75.7788	62.272	-5.8468	-3.8352	-7.0144	-7.144	-1.9644
1KQI	-2549.45	0.776	-49.5092	62.3108	82.4456	63.992	-5.6844	-3.59	-5.8396	-7.158	-2.0424
1KRW	-11363.5	-0.0352	-214.094	51.9104	67.6684	61.668	-3.7124	-4.2728	-7.0364	-7.8432	-2.0948
1KUN	-3813.22	-0.272	-79.676	59.598	68.2848	57.452	-4.458	-3.7596	-6.5216	-6.958	-2.2424
1KV4	-2283.81	0.8924	-51.224	27.214	86.2	81.024	-3.348	-1.4964	-8.8616	-7.176	-1.05
1L1I	-5475.62	-1.4052	-113.739	44.5044	62.5856	47.544	-3.9864	-2.4292	-7.1024	-6.9472	-2.9392
1L3G	-9275.06	0.1548	-190.298	61.3416	81.9172	76.6	-3.6244	-4.0456	-4.9372	-7.5136	-1.8272
1L3H	-4297.3	-0.602	-86.8484	49.7108	68.8888	55.84	-4.7424	-2.606	-6.2884	-6.468	-1.0256
1L3Y	-2212.65	-0.1896	-45.0752	78.566	68.5124	51.304	-5.7916	-2.5144	-6.4712	-7.7072	-0.962
1L7B	-6676.02	-0.4508	-138.314	43.94	66.4004	59.596	-4.2288	-3.842	-7.3324	-7.924	-0.8868
1L7Y	-7899.63	-0.8412	-150.872	23.0716	71.696	68.212	-3.992	-3.6848	-6.0356	-7.1072	-0.1636
1LD6	-3847.97	0.678	-82.1832	49.8212	71.1436	59.828	-4.4204	-3.0632	-6.3304	-6.3644	-2.6576
1LFC	-909.484	3.2364	-19.7976	71.042	46.2604	29.332	-7.9656	-3.4424	-8.3332	-7.2724	-2.7752
1LKJ	-14018	-1.1792	-292.131	19.2936	78.1668	81.828	-0.7964	-0.6668	-5.5412	-6.8684	1.0972
1M2F	-14502.9	-0.8248	-266.073	28.9296	82.2248	71.48	-2.3796	-3.2576	-6.2036	-6.586	-0.494
1M30	-4408.06	-1.0912	-88.516	87.8552	67.642	50.752	-3.6116	-0.1084	-6.61	-7.9868	-2.0376
1M5Z	-7810.04	-0.902	-145.93	48.6208	80.63	77.452	-3.3532	-2.512	-5.454	-7.2584	-1.0376
1MB6	-2243.72	0.122	-47.3324	34.6092	81.9412	68.14	-3.6292	-2.498	-5.5236	-7.1236	-1.9184
1MG8	-6807.82	-0.7092	-124.368	47.6968	64.5792	51.472	-4.018	-3.5368	-7.5252	-7.4836	-1.2072
1MK3	-12958.3	1.2024	-245.496	34.2916	54.954	45.196	-6.5336	-5.2868	-8.0592	-7.562	-2.3292
1MMC	-1724.09	-0.5436	-34.4132	64.9876	68.2864	47.36	-7.7112	-3.3964	-5.786	-6.1948	-1.112
1MNL	-6917.41	0.1692	-144.249	101.631	55.236	46.68	-4.0816	-3.6064	-7.988	-7.8436	-2.6516
1MPZ	-2182.09	0.0176	-46.772	104.949	39.4876	22.384	-6.3256	-4.0872	-8.7312	-7.6032	-3.34
1MUT	-10870.3	-0.01	-209.474	54.7748	70.4248	58.444	-4.5888	-4.1156	-6.684	-8.1236	-1.5992
1MZK	-10177.1	-0.524	-191.976	89.834	66.2	48.992	-2.6264	-3.2648	-7.2024	-7.6284	-1.9084
1N4I	-6418.77	-1.1896	-126.912	63.076	52.4996	35.528	-3.7632	-2.224	-7.892	-6.9436	-2.0544
1N88	-8020.71	-0.16	-158.941	112.146	72.7244	66.724	-2.664	-3.0544	-6.102	-7.2424	-0.7972
1NBL	-3104.33	-0.8992	-71.07	81.288	89.4552	78.616	-2.414	-2.5996	-5.2268	-6.8232	-1.7848
1ND9	-2741.25	0.1236	-65.0924	177.66	54.978	62.08	-3.4436	-3.4088	-8.1832	-7.9724	-2.4776
1NE5	-2620.9	-0.1972	-62.3896	62.606	71.1	65.444	-4.8576	-2.6124	-6.9192	-7.458	-2.0644
1NER	-6474.22	-1.1624	-126.86	42.6288	75.9452	65.572	-4.2296	-3.1372	-6.752	-6.4156	-1.1972
1NFA	-12242.8	0.8984	-217.011	29.7836	58.8408	44.888	-7.438	-5.7656	-6.8952	-7.6624	-2.1264
1NI7	-15477.8	-1.0912	-296.954	29.3588	80.678	75.968	-2.5548	-2.37	-6.5116	-6.9932	0.764
1NMV	-12260.8	-0.396	-257.652	58.94	81.0672	75.744	-3.3128	-1.9348	-5.0876	-6.356	-1.1464
1NOR	-3124.56	-0.4928	-85.6272	68.5588	90.1716	75.92	-3.3444	-2.9772	-4.362	-6.8356	-1.2164
1NWV	-8354.81	0.8404	-164.427	113.76	51.5904	38.156	-5.9016	-3.9084	-7.466	-7.3728	-2.2112
1NY9	-7280.21	-0.2908	-157.883	66.686	79.086	76.24	-3.5184	-3.1576	-6.7512	-8.0668	-1.7232
1NYN	-8831.62	-0.8348	-179.181	17.5288	73.8716	70.156	-4.5872	-3.4208	-6.6624	-6.52	0.0532
1O78	-5486.09	-0.1104	-95.3816	53.746	61.8064	45.824	-5.3376	-2.7848	-7.2648	-7.8052	-1.3376
1O8R	-6997.43	-0.538	-138.505	75.2644	58.956	54.2	-4.8744	-4.9648	-7.7996	-7.6	-2.3688
1O8T	-3513.03	1.6332	-69.5312	38.4488	52.156	38.256	-6.6872	-4.5264	-8.1416	-7.8896	-2.7484
1OCA	-16578.1	-1.364	-311.77	30.2196	83.2648	69.184	-2.6612	-2.4772	-4.7196	-6.5504	-0.63
1OJG	-10746.1	-0.01	-188.752	103.354	43.8204	34.54	-5.4888	-4.2512	-8.4188	-8.0208	-2.9876
1OQ3	-6097.65	-0.5984	-120.977	39.3388	76.3796	67.704	-3.3088	-3.5452	-6.7716	-7.3208	-0.436
1ORX	-1384.82	-0.888	-25.0584	144.052	69.8196	59.016	-3.904	-2.4416	-6.9196	-6.4448	0.612
1PBU	-18996.6	-1.5624	-347.654	66.4236	73.0012	63.62	-2.688	-2.8828	-6.9564	-6.5412	-1.716
1PLO	-9241.36	-0.1448	-178.51	34.1708	59.8656	43.456	-4.5116	-4.19	-6.9692	-7.5168	-2.7832
1PMC	-1573.72	-0.1756	-33.3584	57.3576	68.5892	52.82	-5.6356	-2.2784	-6.5672	-6.6288	-1.2316
1Q27	-13190.4	0.4552	-266.649	38.4796	62.674	57.072	-4.1772	-4.1592	-6.9344	-7.7504	-1.4524
1Q2K	-1769.84	0.8276	-42.77	59.2024	80.138	79.724	-2.4024	-0.9416	-4.3236	-6.4308	0.6316
1Q2N	-4814.59	-1.76	-112.443	48.37	86.8572	83.096	-0.9488	-0.7192	-5.9252	-7.3784	-0.6792
1QFD	-1999.53	-0.7944	-40.9472	49.2224	57.066	46.076	-7.0296	-2.6496	-6.8216	-7.3664	-1.106
1QHK	-3233.94	-0.3696	-69.4044	77.9464	63.1108	57.3	-3.9484	-2.8764	-7.5656	-6.8612	-1.674
1QK6	-1793.36	0.2812	-36.582	27.5844	51.87	37	-7.43	-4.09	-7.7436	-7.338	-2.44
1QK7	-2085.83	0.4332	-40.8196	32.0356	66.2664	51.36	-5.868	-2.9928	-6.122	-7.5216	-1.186
1QKH	-5466.76	0.0988	-103.138	83.8756	73.1264	58.732	-4.3984	-3.4788	-7.028	-7.9708	-1.58
1QQV	-4794.03	-0.36	-96.6052	89.842	72.9844	71.72	-3.1856	-3.444	-6.8948	-7.3416	-1.0356
1QU5	-14446.3	0.192	-283.465	82.892	60.1336	47.38	-4.514	-3.7472	-7.3444	-7.7856	-1.9288
1R63	-5729.87	-2.0628	-120.63	32.4164	86.1656	84.948	-2.4924	-2.046	-6.1144	-7.378	1.0276
1ROO	-2212.59	0.2032	-43.8672	107.835	73.4572	59.208	-4.5612	-1.742	-7.2868	-7.6448	-4.0752
1SPY	-7870.89	-1.1508	-155.554	24.7224	71.4472	71.708	-2.528	-2.066	-7.1844	-6.9696	-0.2972
1TFS	-3808.72	0.2312	-81.834	53.6128	76.7576	61.92	-5.2516	-3.6588	-5.2232	-6.8784	-1.802
1TIH	-3132.5	-0.3984	-63.758	43.8952	76.078	55.82	-5.0812	-3.1252	-7.1712	-7.2952	-1.6332
1TLE	-3422.6	-0.1292	-66.8556	63.7832	74.2136	47.128	-5.2324	-3.5016	-6.112	-7.5324	-2.2808
1TNW	-13079.1	-0.0632	-277.881	32.6984	82	79.016	-1.7756	-2.5312	-5.616	-7.1544	-0.5732
1TOF	-11064.1	-0.6884	-215.133	46.2852	71.128	69.98	-1.002	-2.0168	-6.6448	-6.8284	-0.2728
1UGL	-2355.07	0.2932	-58.9476	80.3076	60.6672	51.272	-6.006	-4.5636	-7.7888	-7.4448	-3.09
1VTP	-1263.5	-0.174	-28.5992	17.3748	88.5	75.66	-3.5172	-2.3964	-6.4204	-7.1296	-2.376
1WKT	-7118.67	-0.9684	-136.876	50.19	80.1856	64.72	-3.6056	-3.1716	-4.7036	-6.5188	-1.2548
1ZAQ	-2685.24	0.5404	-46.8172	55.8312	45.81	28.212	-7.3296	-3.4712	-8.618	-7.5284	-3.142
2BBG	-2490.65	-0.1968	-52.2944	82.8868	69.8944	52.5	-5.3232	-3.688	-7.2676	-6.6724	-1.4
2CPB	-2634.8	2.1808	-59.2112	43.7484	77.3344	75.244	-2.8704	-2.0948	-7.2344	-7.1672	0.778
2CPS	-2690.9	2.1012	-59.0064	41.6068	76.584	78.784	-2.3232	-1.6792	-7.03	-7.2624	-0.0284
2EZL	-8823.52	-0.86	-184.62	34.9004	82.3912	81.112	-2.724	-2.498	-6.1228	-6.3748	-0.284
2HID	-7389.87	-1.2752	-148.008	39.7788	86.9644	82.844	-1.6008	-2.1036	-5.0088	-6.3056	0.3548
2IGG	-4116.7	-0.5392	-92.284	62.9388	78.0008	74.784	-2.9576	-2.786	-6.8444	-7.324	-0.4356
2IGH	-4050.91	-0.47	-92.6872	70.484	76.0016	73.336	-2.766	-2.9628	-6.34	-7.2188	-0.7032
2KTX	-2248.82	-0.7576	-46.7312	89.72	62.7776	50.656	-5.2336	-2.8268	-8.0736	-7.3296	-2.73
2LFB	-7550.86	-0.6056	-165.116	26.0544	68.2884	64.808	-4.4052	-3.4924	-7.1744	-7.3228	-0.5156
2MOB	-7535.14	0.4888	-144.027	86.3748	66.3912	59.956	-2.684	-3.4404	-7.6464	-7.7772	-2.534
2PTA	-2235.55	-1.1848	-49.0312	56.842	71.1544	57.992	-5.1104	-3.5076	-7.1164	-6.886	-2.1316
2R63	-5626.26	-1.786	-114.418	39.9164	80.264	80.952	-2.4252	-1.916	-7.3112	-7.5412	1.1208
2SOB	-7346.5	0.1352	-136.847	38.8504	57.3896	43.684	-5.8692	-4.7044	-7.6612	-7.7224	-2.4636
3BDO	-6456.56	-0.2984	-109.892	87.1636	50.6	31.576	-4.2332	-1.7492	-8.1804	-7.4008	-2.1628
3GB1	-4761.73	-1.8008	-107.9	17.3088	92.146	88.32	-0.1172	-0.9684	-4.278	-5.394	1.2012
3HSF	-8046.37	-0.7388	-151.782	31.4028	64.5768	60.324	-4.0492	-3.5156	-7.356	-5.8444	-2.0456
3PDZ	-6761.29	-0.5752	-123.732	102.889	48.34	40.42	-4.056	-2.7612	-7.7436	-7.5396	-1.726

## Sheet: CYW
CYW	DOPE_score	Normalized_DOPE	Dfire	Clashscore	RAMA_perc	PRO_favoured	WHA_1st	WHA_2nd	WHA_Ram	WHA_chi	WHA_Back
1A57	-9916.02	-0.726	-187.421	18.9552	74.8072	56.66	-1.8048	-2.3688	-5.9104	-2.8996	-1.9288
1A5J	-9498.58	-1.0412	-202.682	16.9008	78.4444	70.232	-3.1272	-2.8828	-4.872	-2.9436	-2.5196
1AB7	-10274.1	-2.52808	-203.967	13.1331	85.7223	79.9962	0.0492308	-1.04808	-2.31923	-1.59192	-0.571538
1AF8	-7729.03	-1.19192	-160.882	7.76962	84.8908	76.9808	-1.84885	-1.84462	-3.57769	-4.02423	-0.688846
1AH9	-5796.47	-1.02846	-104.678	28.3981	77.4808	65.8192	-2.45615	-1.63846	-5.42346	-4.31462	-1.29038
1AHL	-3465.12	-1.10115	-65.8558	11.6962	83.4696	77.25	-4.13538	-3.03	-3.395	-4.81538	-1.74962
1AJW	-14848.1	-1.74269	-283.538	17.3296	85.2869	76.1692	0.670769	-1.33923	-3.81154	-2.46385	-1.07462
1ALG	-1101.21	0.994615	-21.4288	6.16269	74.1258	67.7423	-5.34769	-3.88462	-5.50231	-2.70231	-2.42192
1APF	-3577.83	-1.265	-69.9962	16.8712	84.2873	70.5885	-4.79577	-3.15385	-4.37308	-4.39538	-1.405
1AZJ	-2258.85	-0.744615	-41.9608	31.8662	80.9946	70.1192	-3.34308	-1.31846	-3.40308	-5.55923	-2.18731
1B1V	-1188.3	-0.196154	-22.6692	11.0246	82.7831	67.0615	-5.00654	-0.847308	-2.44962	-0.771154	0.655769
1B22	-4562.52	-0.0542308	-96.4292	32.7088	66.5177	54.4846	-3.74231	-3.66038	-6.72692	-4.27154	-4.12462
1B3C	-5169.43	-1.26462	-106.375	11.2981	86.1042	77.4615	-3.50769	-2.28385	-3.22308	-1.88577	-0.804615
1BA4	-1905.58	1.57731	-42.8181	5.65923	75.2031	63.9462	-4.52577	-2.33769	-4.57769	-2.41577	-1.28
1BAL	-3116.22	-0.358077	-67.4138	4.26269	89.7981	79.5423	-3.60231	-2.42038	-3.31385	-1.25346	-1.27654
1BCN	-14201.4	-1.90423	-297.775	11.3408	85.9373	78.5577	-0.328462	-1.42538	-2.86038	-2.73192	-1.48654
1BCT	-5355.9	1.49808	-116.767	9.27538	91.1012	91.0538	0.615385	2.73385	-0.232692	-2.57846	1.16923
1BEG	-9669.71	-1.58269	-197.28	8.55154	88.3008	83.4077	0.06	-0.615	-2.30038	-2.76231	-0.818462
1BGK	-2820.02	-1.10577	-61.6662	24.1623	85.1638	75.6769	-1.94231	-1.70115	-4.11	-2.04654	-3.08154
1BH4	-2162.47	-0.287692	-38.9569	13.5381	76.9223	60.25	-3.39231	-2.38538	-4.52885	-2.44346	-2.29769
1BLJ	-10540.1	-1.03885	-201.873	36.7462	84.2369	77.4615	-1.40385	-1.96923	-4.43923	-3.93538	-1.77077
1BLQ	-7397.78	-0.857308	-158.921	9.65154	85.2273	81.6346	-1.61077	-2.31038	-3.82808	-2.79538	-1.75038
1BLR	-11759.4	-0.774231	-241.526	24.7715	76.1258	66	-0.110385	-1.55615	-4.13885	-3.29308	-1.41462
1BNB	-2604.39	-0.583462	-50.3635	18.0196	78.0996	76.1846	-4.48	-3.16885	-3.50154	-2.23038	-1.51038
1BQZ	-6075.26	-1.17	-133.303	20.0496	80.205	73.1923	-2.50346	-2.625	-5.14	-3.10692	-2.56423
1BSH	-12859.4	-0.81	-264.204	10.8492	83.7665	78.2346	-0.843462	-0.754615	-3.84192	-2.61154	-0.185769
1BY0	-1465.39	-0.796538	-45.8523	10.5096	85.6923	80.6154	-1.21615	-1.59615	-3.48577	-2.18269	-0.436538
1BYM	-7355.19	-0.535385	-135.927	11.7227	71.9838	61.0808	-2.99385	-3.21538	-5.70231	-3.44	-2.32077
1BZG	-1706.01	1.95654	-39.8938	24.3654	75.24	67.3692	-3.74885	-3.35269	-5.56885	-5.19192	-4.04731
1C06	-17285.1	-2.01808	-339.832	10.5142	88.9258	83.6231	-1.30923	-0.769615	-2.27231	-0.355385	-0.526538
1C49	-2320.56	-1.44462	-53.5212	12.6119	88.4623	75.7462	-2.83538	-2.31115	-4.15308	-0.875769	-4.18308
1CE3	-3439.68	-0.775	-73.015	10.7777	76.5531	60.1692	-3.42692	-2.07038	-4.80231	-3.37731	-0.929231
1CEJ	-6232.75	-1.23462	-133.863	19.3546	75.2862	59.3462	-3.18962	-2.20423	-4.77654	-2.37231	-2.44769
1CFE	-12478.2	-1.43962	-262.347	11.7169	87.7088	81.0615	-1.48846	-1.43154	-2.73462	-2.49115	-0.453077
1CKY	-1316.67	1.41154	-23.4338	9.32885	59.6146	29.3192	-6.71	-3.86577	-7.46846	-1.725	-3.60385
1CMF	-6294.75	-1.90385	-130.304	37.9858	77.5181	70.3962	-2.36654	-2.79846	-5.93192	-5.23731	-2.68038
1CMG	-5915.94	-1.53769	-128.919	16.5277	85.0488	78.2	-1.28692	-1.48154	-3.95038	-1.85462	-1.11346
1CN7	-10632.7	-1.52846	-215.178	9.42962	85.295	75.5923	-0.505	-1.22962	-3.33346	-2.46538	-0.887308
1CW5	-2802.01	-0.433846	-59.8392	6.64423	75.2508	66.5	-4.11769	-0.779615	-3.59962	-1.89731	-0.554231
1CW6	-2137.66	0.119615	-46.0288	8.96077	79.78	72.6731	-4.00192	-1.60731	-3.25192	-1.75538	-0.0215385
1CX1	-14876.5	-1.60577	-270.014	17.6488	81.4308	69.5538	-0.881923	-2.02077	-4.65385	-3.46692	-1.50962
1CXR	-3153.47	-0.335769	-64.4531	16.37	78.4973	75.0077	-3.39731	-2.21115	-5.25269	-3.93731	-2.74192
1CZ5	-16219.6	-1.015	-319.165	15.25	82.2188	73.4615	-1.88962	-2.28846	-4.11269	-3.53769	-1.04615
1D0R	-1841.62	0.364231	-41.98	6.635	79.2581	74.7692	-2.64808	-0.0446154	-2.85192	-0.792308	-1.41885
1D1N	-8504.35	-0.896538	-159.25	23.8346	74.4254	61.7077	-2.21038	-0.851923	-5.95231	-3.44769	-1.98
1D1R	-6624.17	-1.28962	-143.401	9.18923	81.3869	74.1577	-1.38038	-1.83462	-3.95346	-2.57538	-0.239231
1D2B	-12871.6	-1.24423	-238.334	24.8946	86.3219	76.0154	-1.17154	-1.43808	-3.90462	-3.24115	-2.22308
1D5V	-9647.76	-1.64462	-185.545	9.60192	88.6288	84.3346	-2.15269	-1.30615	-2.07038	0.0511538	-1.04154
1DBY	-11709.5	-2.20962	-228.45	14.3077	88.7185	82.2769	-0.171538	-1.71962	-3.71308	-2.64462	-1.03769
1DC2	-12559.7	-0.326538	-270.354	16.1473	81.0942	73.3385	-3.26231	-2.65577	-4.45	-3.09077	-1.025
1DCJ	-7433.03	-1.49231	-154.965	21.1831	90.5065	80.3269	-0.245385	-0.416538	-2.28692	-2.61115	-0.702308
1DE3	-13783.4	-2.21962	-276.342	11.5381	86.1223	78.1231	-1.715	-1.85308	-2.85923	-2.05962	-0.610769
1DKC	-2135.11	-0.0819231	-44.8138	14.8835	71.9004	55.4923	-5.54077	-3.03346	-5.20346	-4.27923	-1.76154
1DMO	-14545.5	-1.99231	-306.708	51.1523	84.3004	81.4231	-0.0915385	-0.262692	-3.705	-4.535	-0.633846
1DSK	-1800.98	2.07269	-38.9254	10.2554	80.4738	71.9538	-3.38038	-0.749615	-5.69423	-2.12346	-2.94577
1DU2	-4810.54	0.925	-95.98	15.2142	67.6715	56.2462	-5.48577	-4.79692	-5.93923	-3.41538	-3.24692
1DU9	-1496.38	-1.26038	-32.6581	9.48769	86.0942	78.0269	-4.01115	-1.57385	-4.04154	-2.11577	-3.00731
1E0G	-4037.91	-1.88423	-78.2773	26.9631	91.0535	86.6423	-2.50346	-1.06115	-2.80846	-3.56385	-0.468462
1E8L	-12937.1	-1.76615	-260.218	12.0831	84.7677	73.2885	-2.21423	-1.61615	-3.92923	-3.07308	-2.20423
1E9T	-4164.8	-0.701154	-80.1185	27.9523	70.5127	62.3654	-4.47769	-2.79077	-4.70654	-5.09962	-1.96462
1EFE	-4907.45	-0.173077	-90.4696	11.4123	69.4292	59.95	-5.32538	-3.70423	-5.26538	-1.82154	-2.64115
1EGX	-11659.6	-1.80077	-225.976	14.2662	87	80.3462	0.205385	-1.24385	-3.22077	-2.85577	-0.628846
1EIH	-5956.61	-1.18808	-123.141	9.82692	83.5319	71.9231	-2.69923	-2.19038	-3.93538	-2.06423	-1.40923
1EPH	-3711.22	-0.311923	-73.0288	19.0127	66.0646	53.3923	-4.35962	-3.11038	-5.38462	-4.30308	-1.93962
1EQ0	-18251.2	-1.98769	-339.083	16.8604	86.0446	77.3654	-0.691538	0.166923	-3.56192	-0.837308	-1.37115
1EZO	-37390.9	-0.638846	-707.438	15.4042	78.1877	72.9154	-2.61115	-3.50538	-4.98308	-3.47846	-2.07577
1EZP	-37474.5	-0.655385	-712.853	16.3846	78.2819	73.0923	-2.58346	-3.49731	-4.94692	-3.57885	-2.02385
1F3Y	-17440.3	-1.85385	-340.934	22.7788	88.7915	79.9577	-0.552308	-1.27269	-3.58769	-2.11654	-1.21385
1F43	-4751.51	-1.64538	-105.01	26.29	82.5319	74.5692	-3.33231	-3.605	-6.54115	-4.25577	-2.89731
1FAF	-7630.74	-1.48269	-167.752	19.6608	92.6562	87.9923	-0.867692	-1.08115	-2.23692	-2.74077	0.335385
1FCL	-4490.3	-1.61154	-103.467	13.9015	90.81	85.6923	0.772692	-0.397692	-2.47654	-2.98731	0.319231
1FDM	-3097.48	1.30577	-66.64	23.5935	77.4835	69.8462	-2.30231	-0.825385	-4.65808	-2.98731	-1.72
1FEX	-5498.26	-1.92423	-115.474	10.9065	80.9031	74.1231	-1.975	-1.50885	-4.21	-2.73077	-1.94231
1FGP	-5587.18	-0.951154	-110.446	19.7485	76.4688	62.9462	-1.40115	-2.66923	-4.26308	-2.98385	-2.38154
1FJD	-8505.72	-0.996923	-165.957	35.2442	76.2427	70.9231	-3.15154	-2.00154	-5.24038	-3.66231	-1.63462
1FME	-2104.64	-1.73846	-43.7831	6.63962	81.8062	75.6423	-2.82346	-0.847308	-4.20769	-0.638077	-1.47269
1FQQ	-2431.53	-0.339615	-48.7377	26.5015	68.3427	57.5692	-5.78846	-3.50731	-5.585	-4.77577	-2.79038
1FR0	-12876.4	-1.96346	-283.015	14.4592	91.1827	84.6192	-0.115769	-1.15346	-2.20346	-2.23077	-0.647308
1FWO	-2028.25	0.145	-38.4473	16.1188	71.0981	57.8269	-3.78115	-2.35462	-5.15577	-3.66462	-2.02308
1G26	-2176.37	-0.0503846	-42.1373	9.04808	80.7692	73.7577	-3.40769	0.83	-3.24	-3.29846	-0.526154
1G2T	-6157.61	-1.19385	-122.237	8.12308	87.2919	79.25	-2.66115	-1.77154	-3.67231	-2.17808	-1.97962
1G6J	-7463.99	-2.43077	-148.439	7.87346	92.3069	86.8769	0.660769	-0.354615	-1.00692	-1.49	0.898077
1G6M	-3275.13	-1.29808	-86.1123	14.7577	78.3973	67.8462	-3.37538	-2.48885	-4.37615	-2.67846	-1.53885
1G91	-6088.26	-0.749615	-119.504	8.41115	88.0512	76.4346	-2.95346	-2.25538	-3.39038	-2.05692	-1.68269
1G9L	-9219.89	0.700769	-182.09	29.5358	77.7092	67.8269	-4.78846	-4.45692	-5.56423	-3.78885	-2.10423
1G9P	-2232.33	0.925385	-47.7488	10.4031	78.3546	66.5962	-5.58923	-3.42808	-4.83769	-2.68962	-1.58923
1GB1	-4805.85	-2.01769	-105.383	14.2158	90.8815	86.3846	0.950385	-0.158462	-2.63692	-3.57231	0.850769
1GB4	-5121.61	-1.71538	-109.019	13.3427	89.3019	83.4038	0.756154	0.213077	-3.86	-2.35769	0.0692308
1GD5	-13133.1	-0.791923	-255.686	16.7327	81.7619	74.1192	-2.18692	-2.32115	-4.68577	-3.45615	-1.46615
1GE9	-19442.7	-1.805	-434.27	12.7212	91.4177	87.1115	0.848077	0.0403846	-0.630385	-2.48962	0.686154
1GGW	-12712.1	-1.11269	-250.406	17.0562	79.0688	71.2692	-1.86923	-1.83423	-4.02	-2.99731	-1.175
1GH9	-5093.79	-0.513077	-108.978	14.845	82.4992	74.6154	-3.13038	-1.85192	-3.88923	-3.47808	-0.963846
1GHK	-6346.12	-1.08	-120.276	9.50154	86.4142	79.4615	-1.20731	0.0303846	-3.27192	-2.42846	-0.366538
1GHU	-9770.44	-1.63769	-187.015	9.64038	88.8335	81.8615	-0.610385	-0.958077	-3.31769	-1.92769	-0.965769
1GJS	-5602.91	-0.607692	-119.877	9.82385	88.1565	80.7	-1.53115	-0.995769	-2.82231	-2.10846	-0.886154
1GXE	-9739.97	-1.00115	-184.666	11.4962	80.2888	72.8962	-3.265	-3.40423	-4.47538	-3.47385	-1.16846
1GYZ	-5748.77	-1.11885	-116.361	29.6465	82.4938	73.5077	-2.11846	-1.76192	-4.76769	-3.92038	-2.16231
1H0Z	-4578.05	-1.65192	-105.612	13.2996	83.5658	73.7346	-3.255	-2.64346	-4.23192	-3.11	-1.48808
1H2O	-15626.5	-1.47	-314.902	18.2292	88.8781	80.8154	0.541923	-0.399615	-3.66654	-2.74538	-0.820385
1H3Z	-11042.6	-2.10885	-211.47	9.30962	93.0692	90.0192	-1.01885	-0.373077	-1.68577	-1.56462	-0.455
1HA6	-5843.22	-0.496538	-113.183	17.5823	83.0308	72.6577	-2.80692	-2.69115	-3.79962	-2.86769	-2.06615
1HA8	-4261.22	-2.24462	-91.1638	21.0627	81.5531	68.8462	-2.36731	-1.365	-4.00423	-3.75808	-2.44769
1HDL	-4177.01	-0.296923	-86.8888	18.6277	77.3588	69.0769	-2.70462	-2.84038	-4.13808	-3.37269	-3.33923
1HP2	-2620.04	-1.05038	-55.9919	12.3542	86.9242	71.7615	-3.06808	-2.13692	-3.59538	-0.688462	-1.82385
1HP3	-1832.24	-0.0503846	-38.6015	13.6392	85.1285	65.8192	-4.41615	-2.48038	-4.71577	-3.82692	-2.74269
1HPW	-9132.3	-0.367692	-180.892	13.1508	75.0465	58.8923	-2.51346	-2.62346	-5.33308	-2.76577	-1.66462
1HS7	-9969.25	-2.75	-233.255	18.2631	92.995	89.8923	1.48192	0.787692	-0.886538	-1.96385	-0.226538
1HVW	-1548.1	-2.38077	-33.7708	13.8027	87.9588	79.8846	-2.28462	0.401538	-0.623462	-3.43077	-0.468077
1HX2	-3756.86	-0.800385	-75.7262	18.2515	83.9527	68.3231	-3.02808	-2.22462	-4.47769	-2.73423	-1.81808
1HZK	-9224.1	-1.29962	-178.149	10.0685	87.5704	82.35	0.333462	-0.431923	-2.94538	-3.57077	0.459615
1I25	-1898.36	0.662692	-44.3165	12.9512	81.3181	72.3154	-3.28269	-0.674615	-3.83346	-0.956538	-1.77885
1I2U	-3143.78	-1.02538	-65.9204	14.8727	83.8827	73.85	-2.85538	-2.26077	-3.14731	-2.88962	-0.658077
1I2V	-3163.93	-0.472692	-65.6923	11.9169	85.1654	72.9654	-2.64885	-2.11269	-2.53	-3.20923	-0.0957692
1I42	-7574.47	-0.543462	-147.703	24.3438	81.3008	74.3885	-1.30231	-2.81115	-3.19962	-4.49038	-2.25038
1I6C	-1944.92	-0.609615	-46.6454	15.7746	76.7162	65.6231	-2.93385	-2.72962	-3.50731	-4.31077	-1.72769
1I6G	-4483	-1.44231	-97.1408	8.40538	93.635	85.5115	-1.63731	-1.21731	-1.51808	-2.35115	0.276154
1IDL	-4355.6	-0.0761538	-87.8546	22.4738	58.815	42.2385	-5.38615	-3.59462	-7.15731	-3.25231	-3.07692
1IE6	-1337.05	-0.519615	-37.0177	26.8808	75.6831	62.0923	-4.12	-1.64846	-4.61923	-1.94923	-3.35962
1IEZ	-17752.7	0.00653846	-312.719	22.8358	59.0342	42.5038	-4.53692	-4.18885	-7.01231	-4.03731	-3.39
1IFW	-6896.52	-1.19962	-154.16	19.525	83.2488	75.6923	-3.13577	-3.74538	-4.53654	-2.83885	-2.81154
1IG6	-10622.3	-1.54423	-217.333	14.3304	80.5858	75.3846	-2.85769	-2.82	-4.30615	-2.78154	-2.13615
1IGL	-5292.09	-0.644615	-100.746	13.5	74.0227	63.2885	-4.74154	-3.27731	-5.71115	-3.05654	-2.88423
1IOX	-3244.77	0.438077	-64.44	9.91	81.7296	67.3846	-4.49654	-3.39462	-5.47231	-1.76154	-1.98538
1IP9	-7720.53	-1.43	-154.514	14.0735	83.4573	76.3038	-0.0411538	-0.965385	-3.835	-2.48846	-1.17846
1IRH	-4324.32	-0.931538	-91.7423	14.1485	79.4015	67.7692	-2.73577	-2.47423	-5.13846	-2.01	-2.57885
1IRZ	-6115.98	-1.45	-126.303	8.12077	87.0969	78.8231	-0.971154	-0.432308	-1.74038	-1.13731	-1.01308
1ITF	-19514.5	-1.92154	-402.711	12.3454	88.4381	83.6154	-0.238077	-0.647692	-1.87538	-2.02346	-0.609615
1IVM	-13497.3	-1.71308	-263.044	15.0854	80.74	71.9346	-2.24885	-2.71885	-4.25769	-3.57808	-2.44
1IW4	-3748.72	-0.223077	-72.7938	24.9642	73.4396	59.6538	-3.44615	-3.02962	-5.42692	-4.96385	-2.55385
1IY5	-4242.81	-1.50654	-84.1969	12.5758	87.0562	72.5731	-2.19154	-1.21577	-2.8	-1.75885	-1.43192
1IY6	-3872.77	-0.622692	-78.1831	33.0531	76.4796	58.2692	-3.34538	-2.11	-4.92577	-3.33731	-2.49692
1IYC	-1757.44	0.391923	-35.8765	25.5081	59.9542	45.3269	-5.77423	-3.99346	-7.11923	-4.53846	-3.49462
1IYY	-8714.12	-1.49269	-179.614	16.5246	75.4888	66.4731	-2.21192	-1.91346	-4.63462	-3.28692	-1.51538
1J6Y	-9125.54	-0.673846	-188.027	16.8392	70.535	61.0462	-3.42846	-2.94846	-5.49077	-3.91538	-2.04077
1J7M	-4796.41	-1.64923	-94.185	11.9785	86.1412	80.1154	-2.50423	-2.42769	-2.88346	-1.02615	-1.27885
1J7Q	-6803.46	-1.40115	-148.4	44.59	77.15	72.5577	-2.92654	-3.70231	-4.86115	-5.35462	-2.20346
1J8C	-7654.9	-0.739231	-145.098	13.5208	71.1754	58.7192	-3.62731	-3.12538	-6.04692	-3.39577	-2.30846
1J8K	-7795.79	-1.59769	-150.885	11.4135	79.7246	70.8538	-1.49769	-1.78577	-5.12231	-3.21269	-1.35462
1JAS	-16194.1	-2.42885	-319.538	17.7692	83.8465	77.5462	-0.721538	-0.853462	-2.92615	-2.52385	-0.596923
1JC6	-4369.68	-0.342692	-93.3077	11.6704	78.2654	68.8192	-4.28962	-3.90731	-4.82385	-2.96308	-2.92731
1JCU	-18277.6	-0.631154	-333.93	16.5962	70.6115	61.4423	-3.75846	-3.80385	-5.95962	-3.77692	-2.12577
1JE3	-6855.97	-0.204615	-141.227	18.3988	74.4935	66.7115	-4.54654	-4.09846	-5.30885	-3.57346	-2.14423
1JE9	-3518.74	-0.918077	-88.5412	15.1177	80.9012	67.1115	-2.84385	-2.50115	-4.30962	-2.78115	-1.95423
1JFN	-8106.57	-0.343846	-160.45	13.8662	79.685	66.4538	-4.98346	-4.005	-4.54615	-3.19077	-1.87423
1JGK	-4517.27	-0.00615385	-95.1612	17.0146	74.5185	59.1654	-2.61154	-2.80192	-5.69346	-2.60731	-2.46115
1JI8	-11151	-1.76462	-222.525	9.93923	81.9692	78.1308	-2.06192	-2.31692	-3.09538	-1.37423	-1.18231
1JJG	-7824.62	0.208077	-148.916	10.0946	77.9615	65.5577	-4.15692	-3.44731	-4.55462	-2.79346	-1.58423
1JKZ	-3661.55	-1.10038	-76.5827	14.3754	83.3035	73.9962	-1.39192	-2.77308	-2.67115	-1.65615	-1.92077
1JLZ	-1241.88	-0.810385	-29.0273	6.31692	86.2646	77.1577	-2.93115	-1.61308	-2.60423	-1.55654	-0.513846
1JNJ	-9825.68	-1.60577	-187.559	11.7969	82.6908	74.3577	-1.16885	-1.42923	-3.93692	-3.2	-1.49885
1JNS	-8322.08	-0.824615	-165.438	18.7658	79.4869	71.5115	-2.34385	-1.95269	-4.10615	-3.20808	-2.07231
1JO5	-3002.95	2.295	-52.9508	8.60231	66.9746	53.5769	-5.25615	-4.04038	-6.51462	-3.07615	-3.79962
1JO6	-2159.8	0.554231	-48.0477	8.10038	79.1588	68.4769	-4.89038	-4.19192	-4.19231	-2.23385	-2.81038
1JOR	-13678.3	-1.43192	-282.085	8.42385	87.5746	77.8038	-1.72808	-1.53346	-2.59462	-0.0330769	-1.06577
1JRJ	-2520.57	-1.63	-63.0358	6.96769	88.9808	89.9808	-1.01615	1.07808	-1.01346	-1.28731	0.0803846
1JV8	-4671.46	-0.781154	-96.5327	10.0569	84.6158	77.1769	-1.79808	-1.41192	-3.18115	-0.565	-2.16462
1JW2	-6237.94	-0.632692	-128.205	17.5062	80.11	72.6846	-2.77308	-2.33885	-4.70769	-3.94346	-2.55538
1JW3	-14067.3	-0.544231	-262.423	26.2769	68.3954	57.8615	-2.35808	-2.48808	-5.78962	-4.22269	-2.61192
1JWE	-12642	-2.42385	-262.852	12.2238	90.5569	86.4423	-0.138462	-0.183846	-1.19154	-1.99692	0.144615
1JYT	-12196.4	0.511538	-238.462	12.69	82.0346	74.1731	-3.39846	-4.32269	-4.41885	-3.26462	-2.04577
1K0P	-1561.96	0.201538	-29.3942	40.1823	55.0392	28.5231	-6.98885	-3.47192	-7.86923	-5.05	-4.41192
1K1V	-3251.54	-1.64654	-80.9404	11.3508	91.6188	90.4423	0.260385	0.603462	-1.73308	-1.45808	-0.509615
1K8B	-4046.49	-0.640385	-89.95	26.2031	82.6923	82.1346	-1.72462	-0.161154	-1.90654	-3.34615	1.28346
1K9C	-3345.45	-0.92	-74.48	16.3019	76.5485	57.4077	-5.34077	-4.01077	-4.30269	-2.78231	-1.89962
1KGM	-1787.89	-0.960385	-39.3981	11.7131	81.5865	68	-4.00269	-0.824615	-4.73269	-2.64808	-1.43962
1KIO	-1746.42	-0.948462	-37.8242	16.0662	76.2258	65.6731	-3.96385	-1.00115	-4.81615	-3.11269	-1.61923
1KJ0	-1667.04	-1.47846	-36.1331	15.8588	61.1923	54.7269	-5.15885	-2.28038	-6.49077	-3.20885	-1.67192
1KMD	-11992	-2.05654	-240.991	9.50962	86.7215	81.6269	-2.39769	-2.61731	-3.35	-1.61308	-1.27077
1KOZ	-2588.24	-0.463462	-46.4192	11.9588	70.9281	49.0962	-3.98154	-2.41269	-5.54769	-4.32192	-2.31577
1KQH	-2669.12	0.339231	-52.3619	18.6773	84.0812	74.1077	-4.48308	-2.98	-3.69923	-2.21269	-2.13077
1KQI	-2731.38	0.224231	-53.4238	16.8727	83.5477	72.1808	-4.19462	-2.35077	-4.11038	-2.92346	-2.28885
1KRW	-13124.9	-1.29962	-258.092	15.6608	77.1142	72.6154	-1.42808	-2.47654	-4.62808	-3.60192	-1.52615
1KUN	-4235.66	-0.956154	-87.7096	12.4335	83.5846	72.2615	-2.81538	-2.70962	-4.21885	-2.32385	-2.03692
1KV4	-2557.4	0.249231	-60.8673	9.08038	87.8846	83.5154	-1.28731	0.677692	-2.15846	-2.63423	0.279615
1L1I	-6414.88	-2.32038	-135.633	22.2692	73.0304	60.0923	-1.28692	-1.35885	-5.35	-3.43692	-3.14808
1L3G	-10496.6	-0.758462	-214.363	17.2569	86.6504	80.7731	-2.23269	-3.04154	-2.86654	-3.29808	-1.74115
1L3H	-4670.64	-1.16462	-94.4123	11.6415	86.5077	76.0231	-3.37808	-1.30808	-2.76154	-2.03808	-0.285385
1L3Y	-2461.43	-0.758846	-49.1962	20.8173	77.2196	58.3577	-4.58538	-1.82308	-4.47038	-1.95731	-0.491923
1L7B	-7176.85	-1.01615	-152.411	18.4369	78.1615	73.0538	-2.40038	-2.775	-4.96962	-3.22577	-1.29269
1L7Y	-8608.96	-1.57115	-165.687	6.20923	83.6119	76.5	-1.62231	-2.00346	-3.27615	-2.60769	-0.0946154
1LD6	-4216.15	0.0215385	-89.5481	8.06885	82.8977	73.4846	-2.68654	-1.41692	-3.865	-0.279615	-2.21269
1LFC	-1180.36	2.245	-24.3935	16.1181	73.5788	58.2423	-5.58192	-2.42462	-6.42846	-0.933462	-2.76115
1LKJ	-14827.1	-1.79	-311.451	9.08308	88.0885	84.1192	0.203846	0.170385	-1.87154	-1.53769	-0.122692
1M2F	-15756.6	-1.74346	-297.544	9.61538	88.5192	79.6846	0.28	-1.00846	-3.04269	-0.403462	-1.27962
1M30	-4923.6	-1.885	-96.3869	22.8242	76.9927	65.0692	-2.06692	1.43962	-4.74654	-2.55231	-1.51654
1M5Z	-8447.44	-1.59577	-159.359	12.2858	85.6092	80.4962	-1.59077	-1.18038	-3.59269	-2.48808	-0.5
1MB6	-2402.16	-0.376154	-50.0615	9.20692	86.2481	69.9654	-2.13846	-1.29654	-3.74462	-1.65154	-3.62038
1MG8	-7499.28	-1.54692	-140.368	15.2881	77.5804	68.55	-1.36692	-1.66308	-3.98231	-2.24423	-0.587308
1MK3	-15523.4	-0.0634615	-305.998	10.2065	74.1042	63.7769	-4.42692	-4.21423	-5.62269	-3.09346	-3.22962
1MMC	-1919.08	-1.14231	-37.5792	10.2331	88.6008	75.8962	-6.50962	-2.27077	-2.15923	-0.268846	-0.185
1MNL	-7864.81	-0.783077	-160.5	25.5062	71.0888	58.3269	-2.35038	-2.28154	-6.09692	-2.98654	-3.08038
1MPZ	-2455.85	-0.600385	-50.2158	31.2896	54.3388	38.2231	-5.59769	-3.51769	-7.19385	-4.71962	-3.02577
1MUT	-12260.5	-1.00269	-238.305	14.8881	80.0415	70.3769	-2.12692	-2.86308	-4.94231	-2.26385	-1.59885
1MZK	-11204.3	-1.32692	-211.418	23.3585	78.0123	66.3385	-0.430769	-1.78269	-4.48808	-4.79654	-1.47231
1N4I	-7173.19	-1.93115	-148.004	26.2246	72.7277	60.9269	-0.893077	-1.97769	-5.26077	-4.25038	-1.60885
1N88	-8788.06	-0.947308	-174.115	24.0146	84.5342	77.0423	-1.33192	-1.61731	-3.45692	-2.27462	-0.344615
1NBL	-3337.83	-1.40846	-75.3465	21.7354	91.1696	85.4154	-1.09885	-0.925	-1.88	-3.83731	-1.59231
1ND9	-3278.21	-0.81	-73.6438	49.2265	78.0685	76.8462	-2.44846	-2.81423	-5.305	-5.11923	-1.99
1NE5	-2961.93	-0.936538	-69.1727	14.5958	81.8269	69.1154	-3.59	-1.41	-4.49885	-3.57808	-0.823462
1NER	-7211.39	-2.06154	-144.597	11.7942	85.7377	75.1077	-2.56308	-1.745	-3.03423	-0.981154	-1.13769
1NFA	-14600.7	-0.261538	-261.207	11.8496	71.8312	55.4462	-4.01231	-4.09923	-5.68615	-3.21846	-2.14692
1NI7	-16724.8	-1.92423	-326.792	8.85577	89.9031	85.3192	-0.572692	-0.678077	-1.91038	-1.05538	0.0238462
1NMV	-13310.3	-1.04192	-282.302	12.12	88.6523	83.4346	-1.75962	-0.556538	-2.58154	-0.781923	-0.933462
1NOR	-3679.64	-1.25846	-94.9708	14.9585	87.2246	77.6154	-1.71692	-1.65769	-2.23115	-2.10769	-1.00192
1NWV	-9318.45	0.102308	-182.74	22.4538	70.715	58.9962	-4.59962	-3.16462	-5.09846	-4.11423	-2.06692
1NY9	-8029.84	-1.05577	-174.652	16.8912	85.535	79.6692	-2.06577	-1.83423	-3.23115	-3.83077	-1.43577
1NYN	-9685.22	-1.56346	-195.76	8.16577	82.8873	74.9654	-2.43923	-1.82615	-4.31962	-1.48077	-0.930769
1O78	-5987.36	-0.707308	-106.173	16.6969	74.4377	60.1308	-3.22077	-1.40769	-5.95615	-2.90423	-1.32577
1O8R	-7832.29	-1.35	-154.195	19.015	75.0831	68.4231	-3.09154	-3.59231	-5.36615	-3.21038	-2.59846
1O8T	-4404.36	0.648846	-90.2335	10.315	69.1796	55.2	-4.51769	-3.65846	-6.28	-2.40346	-3.92769
1OCA	-17803.3	-2.11077	-335.708	11.2496	90.1831	77.8769	-0.754615	-0.794615	-3.19962	-1.48885	-0.232692
1OJG	-12030.6	-0.893846	-215.26	24.7338	64.9827	51.7654	-3.74231	-3.12808	-6.34192	-4.14846	-3.01923
1OQ3	-6635.48	-1.29385	-132.783	13.3227	87.6292	79.3038	-1.20346	-2.14615	-3.32615	-2.79115	-0.0280769
1ORX	-1540.18	-1.46962	-28.695	20.4454	81.9919	68.2769	-3.52346	-1.99346	-5.17654	-4.15923	0.490385
1PBU	-20521.8	-2.48846	-385.49	20.1712	86.3212	77.0308	-0.641154	-1.66615	-3.895	-2.70115	-1.87885
1PLO	-10239.3	-0.925	-197.617	13.5942	75.8977	61.5038	-1.97423	-3.00077	-5.18577	-3.44538	-3.255
1PMC	-1853.51	-0.837692	-39.7965	13.1235	82.92	72.0308	-4.04808	-1.11	-3.50615	-1.39538	-0.716154
1Q27	-14970.6	-0.508846	-299.876	12.6577	75.9212	67.1077	-2.15385	-2.81269	-4.545	-2.80462	-1.60692
1Q2K	-2001.76	0.110769	-46.3323	18.9746	87.9304	82.9192	-0.816154	-0.828462	-2.45808	-1.79115	0.416923
1Q2N	-5175.05	-2.35885	-121.502	10.7865	90.5908	87.2462	0.268077	0.269231	-1.56154	-1.96192	-0.599231
1QFD	-2276.83	-1.54769	-46.1981	15.0873	79.4877	71.5808	-4.95846	-0.700769	-3.39885	-2.59923	-1.20615
1QHK	-3729.39	-1.28846	-80.1162	15.5923	81.025	73.6538	-1.77577	-1.46	-4.40577	-2.33346	-0.668846
1QK6	-2001.64	-0.323846	-40.4088	12.2408	63.6473	48.5885	-5.41692	-2.95923	-6.20038	-2.75808	-2.38038
1QK7	-2279.63	-0.19	-44.2746	9.90615	76.6665	69.0769	-3.95885	-2.51615	-4.26	-2.95269	-1.35885
1QKH	-6059.51	-0.684615	-114.243	22.2927	76.1092	65.5808	-3.10038	-3.09731	-5.24462	-4.40231	-1.55654
1QQV	-5374.42	-1.15423	-110.342	21.355	88.285	80.9077	-1.915	-1.92615	-4.20615	-3.89962	-1.35
1QU5	-16443.5	-0.808846	-319.606	22.6719	75.6415	62.6231	-2.29077	-2.64923	-5.18923	-3.46615	-1.83269
1R63	-6100.01	-2.64692	-131.418	7.79269	92.4954	88.4462	-1.25615	-0.311538	-1.82615	-1.95731	0.223462
1ROO	-2558.4	-0.676154	-51.9981	14.9304	77.7408	73.3115	-3.03654	-2.12615	-6.25231	-1.89692	-5.50654
1SPY	-8717.02	-2.02077	-179.249	10.1508	87.0027	83.2	-0.783077	-0.620385	-2.97038	-1.07577	-0.117308
1TFS	-4274.02	-0.499615	-91.9515	11.3115	84.7488	76.6923	-2.36	-1.74577	-3.025	-2.68115	-1.63154
1TIH	-3442.57	-0.958462	-69.6115	13.4619	82.5788	68.3885	-3.16308	-2.26038	-5.17692	-3.19615	-1.09654
1TLE	-3747.8	-0.681154	-74.5588	10.865	80.0135	61.3654	-4.09308	-2.90615	-4.21038	-3.15615	-1.84154
1TNW	-14400.6	-0.857692	-310.277	13.2773	87.5242	83.9769	-0.632308	-1.08538	-2.83154	-2.97423	-0.978846
1TOF	-11792	-1.39	-234.449	13.4085	85.4885	79.6346	0.812308	-0.769231	-3.84615	-2.44769	-1.03192
1UGL	-2731.72	-0.38	-64.8112	23.9954	72.4362	59.1731	-4.92192	-3.74808	-6.55192	-3.43538	-3.24615
1VTP	-1433.75	-0.763462	-34.6627	11.0731	90.2246	82.6231	-1.42692	-0.823846	-2.60769	-2.27346	-1.97077
1WKT	-7742.76	-1.65462	-150.837	10.47	87.8796	74.6423	-1.36885	-1.92538	-2.43231	-2.92077	-0.677692
1ZAQ	-2993.5	-0.142692	-53.05	14.0688	63.0042	45.0615	-5.39846	-1.99269	-6.71731	-2.27038	-2.88462
2BBG	-2917.7	-1.11346	-60.9981	16.8619	80.9719	68.8808	-3.76346	-2.935	-4.33346	-4.28615	-3.23462
2CPB	-3140.53	1.23692	-74.1015	11.3265	88.0608	85.1577	-0.603462	0.608846	-2.28808	-3.15154	0.00423077
2CPS	-3048.56	1.36846	-71.54	10.4527	91.0254	88.2654	-0.569615	0.243462	-2.61654	-3.19	-0.255769
2EZL	-9546.88	-1.58769	-203.622	8.84154	91.2377	86.1962	-1.71731	-1.32	-2.66192	-1.90269	-0.785769
2HID	-8336.83	-2.22885	-166.603	8.43231	93.6642	88.4577	1.28385	-0.164615	-1.39308	-1.9	0.363462
2IGG	-4839.34	-1.49385	-109.456	13.4012	86.5385	82.1269	-0.633462	-1.10385	-3.35192	-3.42308	-0.650385
2IGH	-4825.14	-1.53231	-108.342	11.5915	87.225	81.4731	-0.435	-0.887308	-3.29038	-3.84038	-0.727308
2KTX	-2612.29	-1.56731	-54.3615	16.3392	82.0515	72.5577	-3.34462	-1.62462	-5.82462	-1.24885	-1.61962
2LFB	-8364.64	-1.365	-186.429	10.6427	82.8085	75.6846	-2.88385	-2.08846	-3.63423	-2.67962	-1.26231
2MOB	-8490.26	-0.468462	-163.343	20.6362	80.3931	72.1846	-0.831923	-1.83654	-5.33269	-3.88346	-2.33308
2PTA	-2384.42	-1.61462	-53.2365	11.3065	87.9962	75.1308	-3.42692	-2.71577	-3.73154	-0.79	-3.47308
2R63	-6069.06	-2.45731	-129.427	8.23538	92.1169	86.2385	-1.28385	-0.866154	-2.06808	-2.96577	-0.196923
2SOB	-8189.4	-0.643462	-154.605	14.7854	73.5742	59.3231	-3.32577	-3.43077	-5.80038	-2.60269	-2.19846
3BDO	-7092.36	-1.05077	-123.283	18.9996	73.3173	58.4269	-2.11385	0.0953846	-5.21923	-3.68923	-1.58538
3GB1	-4872.66	-2.10308	-110.338	8.64	92.8785	89.7692	1.66769	0.874615	-1.06577	-1.03577	1.06692
3HSF	-9450.84	-2.02962	-181.216	9.46231	80.8973	69.5923	-1.40577	-1.95808	-4.24769	-1.22462	-2.49769
3PDZ	-7610.91	-1.37192	-141.566	32.3388	72.0946	61.7462	-2.31962	-1.60577	-5.63462	-4.37692	-1.34231

## Sheet: TrioSA
TrioSA	DOPE_score	Normalized_DOPE	Dfire	Clashscore	RAMA_perc	PRO_favoured	WHA_1st	WHA_2nd	WHA_Ram	WHA_chi	WHA_Back
1A57	-9563.16	-0.5101	-191.144	3.7795	90.525	84.755	-3.39555	-2.52325	1.11105	3.3878	-1.1812
1A5J	-9561.86	-1.08169	-212.564	3.4425	92.9394	85.5844	-2.88931	-1.91869	2.99588	2.68241	-2.06175
1AB7	-10609.4	-2.56867	-214.945	1.32833	97.125	91.0567	-0.569433	-0.761167	2.9445	1.35277	1.50027
1AF8	-8428.02	-1.55929	-180.867	1.36917	95.6862	93.175	-1.67483	-0.877542	2.48433	2.297	-0.0415417
1AH9	-6101.02	-1.14189	-115.141	10.4995	90.8479	82.4368	-3.30095	-1.64937	-0.615737	0.926105	-0.375211
1AHL	-3557.03	-1.07755	-69.041	2.63	99.148	93.195	-5.13865	-3.26205	0.6803	0.03115	-0.9169
1AJW	-15035.7	-1.61345	-298.647	2.2395	96.745	91.1	-0.7589	-1.05975	2.79235	3.25955	-0.6189
1ALG	-1400.27	0.2814	-31.78	0	99.545	99.44	-2.7759	-0.625	4.8146	2.2237	0.1615
1APF	-3714.24	-1.30485	-73.521	3.5955	96.061	92.81	-5.4813	-3.91565	0.84975	1.41135	-0.7002
1AZJ	-2294.28	-0.666167	-43.375	14.1194	91.3433	82.9333	-4.39478	-1.73844	-1.00189	-3.26689	-1.44117
1B1V	-1195.15	-0.0794	-24.256	0.896333	94.288	90.2167	-6.18537	-0.661667	3.74613	2.69743	1.2549
1B22	-4631.3	0.0587667	-99.9897	3.98667	86.811	77.7267	-4.361	-4.18517	-0.343933	1.34093	-4.2906
1B3C	-5174.2	-1.0912	-107.181	1.66275	99.517	91.85	-4.9525	-2.80265	0.267675	2.55527	-0.416225
1BA4	-2210.03	1.2351	-54.369	0	98.948	95.66	-3.4443	0.1915	5.2688	4.7861	0.4931
1BAL	-3079.79	-0.149214	-67.54	0.414643	93.4793	90.45	-4.14166	-2.5942	-2.24364	4.40173	-1.0115
1BCN	-15073.4	-2.14255	-320.308	2.31773	98.8559	95.7273	0.0642273	-0.331636	2.403	3.36555	1.70914
1BCT	-5070.03	2.07071	-105.309	3.75786	79.2093	74.6	-1.66829	0.822857	-1.45793	-1.35721	-1.53036
1BEG	-10378.5	-1.87872	-216.486	0.890556	97.3989	95.5111	0.378944	0.71	5.99667	1.76678	0.409556
1BGK	-2954.28	-1.1904	-67.0427	8.26067	98.0933	90.3867	-2.7476	-1.84833	0.806467	1.83387	-3.10627
1BH4	-2260.94	-0.3265	-43.6725	0.194167	99.405	94.0833	-4.28567	-2.89833	2.12267	-0.142417	-1.17892
1BLJ	-10984	-1.0952	-213.621	11.755	96.7415	94.4	-2.0864	-2.10065	2.2668	-0.47355	-0.85935
1BLQ	-7998.46	-1.13097	-174.44	3.27621	88.3228	86.7172	-1.50672	-1.0981	1.25124	3.46159	1.28445
1BLR	-11904.9	-0.638318	-254.206	4.24182	91.7491	86.4091	-1.52132	-1.80836	0.858409	0.250091	-1.52986
1BNB	-2672.05	-0.5379	-51.238	5.244	92.361	78.465	-5.97535	-3.39305	0.25995	2.2956	-2.6016
1BQZ	-6712.15	-1.5788	-154.939	1.7275	94.8665	91.925	-1.4063	-1.8879	2.65295	2.2532	-1.8224
1BSH	-12998	-0.650267	-277.844	2.86433	94.6817	92.1733	-1.69847	-0.4761	1.92067	2.59503	-0.3046
1BY0	-1840.55	-1.6588	-59.544	0.097	100	99.58	1.5377	0.99675	6.45915	4.9423	0.8334
1BYM	-8045.21	-0.84505	-157.072	2.563	93.526	88.16	-3.054	-2.36895	1.0161	2.2261	-1.85535
1BZG	-1850.5	1.87633	-46.5557	5.12	92.29	88.1633	-2.92423	-2.43493	3.43227	1.83113	-3.14287
1C06	-18253.6	-2.22263	-369.687	0.925	98.69	95.8375	-1.28481	-0.0105	5.07844	5.72612	-0.228313
1C49	-2325.65	-1.32478	-54.4222	4.715	91.7517	77.9778	-4.13372	-2.91172	1.37533	4.05972	-2.74233
1CE3	-3548.99	-0.76875	-77.212	2.037	95.0945	84.43	-4.3161	-1.93965	1.09005	2.6865	-0.39795
1CEJ	-6336.97	-1.17716	-138.079	3.28719	96.3409	81.4781	-4.49194	-2.63384	0.734594	2.65209	-2.34984
1CFE	-12845.1	-1.427	-270.614	3.0415	94.8505	86.87	-2.279	-1.89395	1.8512	2.04905	-0.83065
1CKY	-1589.14	0.8694	-32.377	1.155	92.086	74.28	-6.8382	-2.8934	-2.5232	1.9276	-6.545
1CMF	-6680.27	-2.11035	-141.661	9.9035	96.405	90	-1.64245	-2.78275	1.49535	1.02595	-1.2616
1CMG	-6625.57	-2.05735	-149.565	2.2085	99.154	95.165	-0.40525	0.44055	5.4072	4.3218	0.40425
1CN7	-11123	-1.63485	-232.781	3.5195	98.285	93.565	-0.3402	-0.42815	3.80355	0.5318	-0.75175
1CW5	-3124.46	-0.76215	-69.7465	2.5615	97.1745	94.21	-3.5221	-0.28125	3.5435	0.25585	0.1888
1CW6	-2366.22	-0.149833	-53.7683	0.945	94.9206	90.3389	-4.11706	-0.949833	4.02894	2.22444	0.211056
1CX1	-15296	-1.58941	-288.048	3.045	94.8514	90.7864	-2.06564	-1.81268	0.353909	1.21173	-1.223
1CXR	-3468.23	-0.6395	-72.952	3.441	97.957	94.42	-2.6261	-0.6019	1.685	1.6599	-1.9771
1CZ5	-16935.5	-1.08188	-340.421	1.9048	97.1136	90.98	-2.86132	-2.64768	1.97344	1.81408	-0.97032
1D0R	-2034.75	0.09565	-49.487	0.327	94.288	90.6	-1.9324	1.7748	4.5513	2.4462	-0.4718
1D1N	-8723.81	-0.8459	-168.102	6.728	90.102	84.945	-3.15885	-0.82285	-1.0929	2.03275	-1.8812
1D1R	-6980.52	-1.4192	-150.123	3.361	96.976	93.485	-1.3031	-0.6938	2.80795	2.7523	0.54145
1D2B	-13081.8	-1.12238	-249.712	6.89414	96.1362	89.9379	-2.37628	-1.70972	0.922207	-0.268	-2.14907
1D5V	-10031.2	-1.70904	-196.655	0.8292	99.0876	98.54	-2.37436	-0.708	4.51516	6.60632	-1.94572
1DBY	-12239.4	-2.33889	-246.575	1.53143	98.9482	94.2643	-0.441679	-0.968893	2.86954	2.33775	-0.888
1DC2	-13415.1	-0.49895	-296.197	3.324	98.6025	93.52	-3.0268	-2.21245	2.9516	3.62085	-0.9029
1DCJ	-7779.16	-1.59475	-162.107	2.4005	98.7965	91.32	-0.67435	-0.37015	3.5027	3.27065	-0.5676
1DE3	-14146.7	-2.22005	-287.397	2.7365	98.107	92.515	-2.6097	-1.9068	2.95095	2.0434	-0.26335
1DKC	-2276.74	-0.1898	-49.781	0.96	99.166	96.78	-6.0687	-3.0667	0.5964	0.3807	-0.5271
1DMO	-15657.1	-2.325	-337.985	15.973	96.9427	92.78	-0.1996	0.5642	3.68983	2.1009	0.502567
1DSK	-2176.24	1.3897	-49.8635	1.01	97.8835	92.295	-1.27545	1.5163	5.0566	3.24965	-0.19705
1DU2	-5394.1	0.59815	-114.074	2.293	94.7295	89.08	-4.8577	-4.23555	2.51735	0.78005	-2.85885
1DU9	-1547.65	-1.2892	-35.432	5.2464	96.3064	90.288	-4.99256	-1.74648	2.4686	1.39552	-1.75548
1E0G	-4180.23	-1.93095	-83.353	5.153	99.6745	99.64	-3.30225	-0.71425	3.0187	3.19045	-0.8459
1E8L	-13680.4	-1.96048	-278.399	1.7136	98.0806	92.702	-2.20852	-0.66608	3.3976	2.53412	-1.1451
1E9T	-4349.24	-0.750976	-85.1318	10.5246	91.3312	85.9094	-5.13346	-3.39065	0.345894	-0.731706	-2.31942
1EFE	-5861.3	-1.07455	-113.802	0.635	97.7585	93.44	-4.1313	-2.1511	3.6643	4.7418	-1.8748
1EGX	-12073.5	-1.83913	-242.739	2.03867	95.106	90.4667	-0.487267	-1.1716	2.13773	2.16007	-0.277067
1EIH	-6369.1	-1.4051	-137.63	0.2125	98.0965	96.88	-2.68355	-1.35495	3.9266	2.77895	-0.29865
1EPH	-3900.52	-0.3796	-79.879	4.666	93.14	87.65	-4.9645	-2.6492	1.4338	1.8753	-0.9847
1EQ0	-18886.2	-2.02475	-361.146	1.813	98.816	94.08	-1.2207	0.68315	2.75655	5.58835	-0.89875
1EZO	-40302.9	-0.9358	-789.297	1.619	96.52	91.71	-2.394	-2.553	2.3839	2.184	-1.4808
1EZP	-40585.2	-0.9904	-789.347	1.707	95.352	90.13	-2.5026	-2.629	2.2494	2.2588	-1.9123
1F3Y	-18074.8	-1.90064	-364.064	4.6012	98.848	91.324	-1.12484	-1.26356	1.83004	3.1206	-0.91024
1F43	-4965.94	-1.7395	-109.627	5.769	96.7825	91	-3.63	-3.0962	1.70175	-0.66305	-2.30015
1FAF	-8135.66	-1.72096	-183.314	3.85617	99.8894	98.2447	-0.682596	0.48466	5.49206	2.83138	0.761319
1FCL	-4585.19	-1.5686	-110.704	1.672	98.705	95	0.2183	0.976675	3.15715	1.3866	0.618675
1FDM	-3400.07	1.1046	-76.9425	2.012	93.6445	89.425	-1.56295	0.6084	2.7037	1.45235	-0.61375
1FEX	-5794.8	-2.09324	-124.992	2.1744	95.5096	93.06	-1.88004	-0.96788	4.818	3.72456	-2.37808
1FGP	-5782.16	-0.961333	-118.114	3.598	92.552	85.3267	-2.47473	-2.94773	0.783133	1.53933	-2.7582
1FJD	-8851.2	-1.04065	-179.541	12.8945	91.523	85.475	-3.6483	-1.64405	0.83245	1.05825	-1.4988
1FME	-2202.63	-1.84359	-48.3579	0.174706	93.6647	88.3618	-3.22021	-0.296029	3.37774	6.2915	-2.07253
1FQQ	-2850.31	-0.9086	-59.5455	2.9455	89.6135	87.84	-4.81	-2.9341	1.85675	-0.72965	-1.84285
1FR0	-13993.8	-2.3836	-310.162	1.38567	99.1627	95.3667	0.5057	0.244167	4.943	4.9239	-0.561067
1FWO	-2104.8	0.1604	-41.408	3.11	92.122	87.15	-4.5782	-2.2361	-0.8289	-1.2538	-1.4644
1G26	-2283.47	-0.0983	-44.81	2.487	97.585	96.55	-4.3845	1.4611	2.7333	0.1448	-0.3348
1G2T	-6439.67	-1.2773	-131.165	0.581	99.71	97.2	-3.66325	-1.5573	2.86275	2.55955	-0.7668
1G6J	-7789.71	-2.55434	-159.638	1.75031	100	96.9531	0.60325	0.719937	3.83194	4.41741	2.57372
1G6M	-3441.22	-1.39072	-94.91	1.83778	97.6839	87.5556	-4.51528	-2.56267	1.852	0.258389	-0.584056
1G91	-6289.55	-0.741333	-127.983	1.134	98.3567	96.44	-3.5678	-1.656	3.4011	2.9688	-1.55537
1G9L	-10288	0.3842	-206.923	16.8273	96.7367	89.0067	-4.78887	-4.17333	1.25573	0.775167	-2.8401
1G9P	-2508.79	0.6684	-53.8045	0.2415	99.07	90.785	-6.05425	-3.43225	1.2701	3.8815	-0.76065
1GB1	-5018.24	-2.12432	-115.519	2.3985	98.5508	97.9	0.41425	0.32625	2.78385	2.17207	1.3398
1GB4	-5399.58	-1.87515	-118.521	1.63489	95.8983	94.2872	0.226723	1.03345	2.20789	3.07919	1.36757
1GD5	-13640.8	-0.8141	-274.882	3.6505	95.037	91.015	-2.1999	-2.19995	0.97035	0.6258	-1.60155
1GE9	-20529.5	-1.99653	-470.456	2.03267	96.7	94.8267	0.594133	0.984733	5.27453	3.67313	0.827867
1GGW	-13487.6	-1.29281	-270.068	3.43615	94.7596	88.7538	-2.34296	-1.633	2.14085	1.66904	-1.12069
1GH9	-5332.91	-0.56855	-116.242	2.504	98.4775	98.88	-3.8043	-2.07645	3.12155	0.4449	-0.48645
1GHK	-6734.45	-1.24332	-132.368	0.9148	98.752	93.94	-1.68556	1.0828	3.15836	3.85044	0.13744
1GHU	-10351.6	-1.846	-200.965	1.625	99.0125	94.5042	-1.03721	-0.5295	2.61529	4.48025	-0.535958
1GJS	-5980.81	-0.800033	-133.065	0.528	99.735	98.3833	-0.760967	0.6369	6.3496	2.60323	-0.291833
1GXE	-9819.04	-0.8728	-195.743	2.297	97.112	94.68	-4.1202	-3.1751	2.6342	3.4156	-0.0824
1GYZ	-6465.81	-1.7385	-132.751	5.549	94.0505	85.545	-1.56045	-0.46915	2.2793	1.4964	-1.6434
1H0Z	-4923.74	-1.88786	-117.401	2.09857	97.2576	93.4429	-2.78048	-2.03967	2.74638	4.48176	0.0897619
1H2O	-15948.8	-1.39388	-335.576	4.02042	97.3188	92.1708	0.0126667	0.922125	2.53362	3.68962	-0.442625
1H3Z	-11506.9	-2.20791	-223.493	1.68304	100	98.4696	-1.70287	0.0934783	3.44935	2.55374	0.485783
1HA6	-6216.5	-0.65755	-125.415	5.44	95.9575	93.7	-3.04725	-2.9828	2.90525	0.3766	-1.976
1HA8	-4402.86	-2.295	-96.146	6.348	92.86	81.68	-2.9813	-1.62805	1.338	-1.901	-2.81295
1HDL	-4662.04	-0.717952	-100.943	2.29333	94.9705	90.8571	-2.22543	-1.7589	2.74871	2.31138	-1.34824
1HP2	-2765.8	-1.17073	-60.5887	0.905333	94.7647	89.4467	-3.5081	-2.47833	2.15647	2.49377	-1.53917
1HP3	-1987.82	-0.2348	-42.4085	2.422	99.667	89.235	-4.66285	-2.155	0.2959	1.13245	-1.2394
1HPW	-9924.15	-0.6163	-208.509	1.261	90.473	84.17	-2.6576	-2.4541	1.1971	1.9516	-0.9682
1HS7	-10773.3	-3.15665	-254.606	1.725	99.0025	98.46	1.92775	1.92425	6.43125	3.6984	0.11995
1HVW	-1606.38	-2.46505	-36.7345	3.223	100	96.755	-3.7898	1.06935	3.8912	1.94795	-1.69155
1HX2	-3863.74	-0.782	-82.6715	3.513	97.243	95.785	-3.99985	-3.0487	0.9455	1.38975	-1.3867
1HZK	-9417.57	-1.23913	-192.571	2.367	96.544	94.0933	-0.357967	0.102267	3.22097	-0.498933	0.784167
1I25	-1951.13	0.7317	-45.732	2.515	94.859	89.67	-4.655	-1.273	0.8944	5.3005	-1.2885
1I2U	-3254.61	-1.04289	-71.275	1.93611	98.9422	95.8444	-2.9535	-1.45178	2.27	0.771167	-0.875833
1I2V	-3324.89	-0.546889	-71.4067	2.855	98.1489	91.7333	-2.78056	-1.37961	2.08506	0.720222	-0.802167
1I42	-7716.9	-0.4369	-156.873	6.649	97.01	90.73	-1.9249	-3.0896	2.2094	0.5231	-1.4306
1I6C	-2172.12	-0.9052	-52.575	2.451	92.971	90.31	-3.2503	-3.2194	-0.2511	-0.0354	-1.2365
1I6G	-4572.26	-1.39345	-101.872	1.071	100	90.7	-2.54525	-1.0489	2.96775	1.3471	-0.089
1IDL	-4514.57	-0.06435	-90.6305	1.9335	83.404	71.715	-6.21805	-4.2541	-1.4211	1.69065	-2.56355
1IE6	-1411.68	-0.58565	-39.073	4.3425	86.7745	78.205	-5.20975	-1.8606	-1.18125	3.1477	-2.9711
1IEZ	-20596.8	-0.6909	-389.242	3.426	94.325	88.13	-3.6815	-3.5319	1.3952	1.2443	-2.8893
1IFW	-7416.65	-1.43537	-172.602	3.70467	99.408	98.6067	-2.6116	-2.8548	4.05567	2.86503	-2.38703
1IG6	-11206.1	-1.71118	-239.729	3.43455	98.1836	92.6182	-2.33273	-2.07891	2.86791	0.871	-1.44036
1IGL	-5596.43	-0.7706	-109.508	2.891	93.922	88.255	-5.07655	-3.7399	1.6058	1.4307	-2.94845
1IOX	-3364.83	0.46915	-69.65	3.2205	98.0745	92.51	-5.3733	-3.62747	0.36385	4.71488	-1.92347
1IP9	-8009.78	-1.4709	-164.961	3.967	97.954	95.255	-0.5831	-0.53185	3.11845	4.0894	-1.0895
1IRH	-4514.19	-0.9884	-97.523	2.354	98.8155	93.1	-3.3379	-2.2194	0.9726	2.96465	-1.6442
1IRZ	-6653.88	-1.83133	-138.238	1.35867	98.7113	93.7667	-0.9366	0.555733	5.67167	5.74727	-0.174533
1ITF	-20864.5	-2.24254	-438.001	0.385417	99.2342	96.7083	-0.0997083	0.0507083	5.28437	3.10767	-0.231708
1IVM	-14045.8	-1.7875	-282.267	1.974	97.2695	91.335	-2.49335	-2.6137	3.02435	0.8875	-1.54815
1IW4	-3823.51	-0.13535	-76.9115	3.2715	91.9825	86.46	-4.5606	-2.93715	-0.159	1.2224	-2.40935
1IY5	-4423.86	-1.58153	-90.0967	2.982	99.616	94.0733	-2.66067	-0.374	2.844	1.9218	-0.788133
1IY6	-4289.71	-0.9898	-86.618	5.59	93.588	85.22	-3.84447	-1.72307	1.9312	-0.418733	-1.8272
1IYC	-1895.23	0.2751	-39.489	9.2005	88.237	77.335	-6.19995	-4.82715	-1.18445	-0.1824	-3.41405
1IYY	-9051.45	-1.54446	-191.742	2.05958	89.0125	81.6458	-3.022	-1.92383	0.836708	0.34325	-1.68304
1J6Y	-9842.99	-0.9087	-208.424	3.015	92.8825	89.035	-3.2652	-2.354	2.5095	2.25795	-1.37975
1J7M	-5091.43	-1.83752	-102.23	0.33	99.8624	96.454	-3.3069	-2.0898	3.8824	4.626	-1.53116
1J7Q	-7259	-1.60813	-162.153	15.4187	92.7832	88.6484	-3.22745	-3.59606	1.17335	-1.06868	-2.51881
1J8C	-8761.5	-1.31965	-177.541	1.6695	98.2675	92.85	-2.70065	-1.53865	2.0061	2.23205	-0.58455
1J8K	-8036.62	-1.6087	-164.649	1.4265	98.803	97.205	-2.84465	-1.28615	3.5262	3.47945	0.20275
1JAS	-17418.8	-2.7956	-356.32	3.654	98.603	97.7	-0.5709	0.1588	4.85135	1.91165	0.22585
1JC6	-4583.59	-0.3982	-101.805	1.31	98.412	90.89	-4.6203	-3.5147	2.3262	3.5329	-2.4489
1JCU	-19542.1	-0.83855	-377.286	2.315	96.6525	93.65	-3.68455	-3.23325	2.26075	1.462	-1.23525
1JE3	-7254.63	-0.30345	-151.156	3.797	95.6315	92.455	-5.1797	-4.0886	1.2131	1.6824	-2.6824
1JE9	-3911.84	-1.2485	-100.284	1.14722	98.0261	90.8556	-3.01711	-2.39528	2.2745	1.01539	-0.8515
1JFN	-8416.64	-0.349667	-173.917	2.14533	95.5567	92.0333	-5.9236	-4.40727	1.06653	0.833467	-2.14073
1JGK	-4737.49	-0.0487895	-102.181	1.11632	93.8321	84.2211	-4.27658	-3.56837	0.223684	1.40326	-1.54268
1JI8	-11785.7	-1.9553	-244.534	0.3135	99.587	94.06	-1.96275	-1.39005	4.8139	4.624	-0.80945
1JJG	-8121.98	0.2269	-161.943	0.87	96.5	90.335	-4.63655	-2.94905	2.1743	3.25065	-1.2985
1JKZ	-3635.07	-0.87905	-79.028	1.825	95.792	90.02	-2.9683	-3.3272	3.02465	2.56685	-1.91615
1JLZ	-1255.12	-0.730133	-30.4627	0.199333	96.192	86.6533	-4.04247	-1.3984	2.85873	3.3352	0.021
1JNJ	-10111	-1.593	-202.382	1.3115	95.767	93.915	-1.80805	-0.55545	3.34525	2.81965	-0.4257
1JNS	-8744.37	-0.926	-180.268	7.81	94.1361	90.3611	-3.27656	-1.62633	1.9975	1.1735	-2.41978
1JO5	-3893.38	1.2496	-84.085	0	98.914	97.12	-1.202	-0.3866	4.2642	2.585	-0.8971
1JO6	-2529.76	0.12925	-60.6067	0.385	97.7708	95.1375	-4.01887	-3.05921	4.18038	3.00258	-2.80388
1JOR	-14019.1	-1.39157	-296.68	0.861667	97.9373	92.8	-2.34083	-1.20887	3.48793	6.792	-1.00447
1JRJ	-2788.13	-1.99711	-71.6225	0.338333	99.0997	98.7056	-0.414833	3.24311	5.76658	6.47317	0.928528
1JV8	-4908.38	-0.872609	-101.777	3.00913	97.823	90.2957	-2.20061	-1.54357	0.657043	3.53087	-2.09548
1JW2	-6948.38	-1.1118	-150.042	5.545	95.853	93.23	-1.5709	-0.4934	4.9858	1.2563	-0.902
1JW3	-14809.9	-0.656	-292.437	5.722	95.435	92.07	-2.2213	-1.5089	2.0761	2.5242	-1.1719
1JWE	-13150.3	-2.52235	-278.026	2.238	98.2135	95.285	-0.2294	0.6749	4.19045	3.0849	-0.3402
1JYT	-14203.8	-0.1278	-290.207	0.8855	98.2635	94.87	-2.8481	-2.55595	4.30765	3.91215	-0.13455
1K0P	-1608.07	0.2476	-31.876	15.178	78.39	66.3933	-7.2952	-3.80473	-3.3208	1.90713	-5.53267
1K1V	-3530.86	-1.9697	-89.4925	0.28	100	99.865	0.9933	2.5609	7.4485	6.00145	0.10935
1K8B	-4189.24	-0.6406	-94.422	7.044	95.2	92.86	-2.0273	0.572	4.1054	2.7084	0.7693
1K9C	-3599.69	-1.07175	-83.907	8.3335	93.335	82.93	-5.6314	-4.1658	1.2007	3.79435	-2.175
1KGM	-1817.63	-0.9155	-41.632	1.854	90.001	81.77	-4.7651	-0.6943	-0.3429	0.2892	-0.3094
1KIO	-1795.29	-0.9451	-39.97	2.678	86.365	81.08	-5.1697	-1.2149	0.5995	-0.047	-1.3758
1KJ0	-1763.93	-1.5994	-39.351	3.984	79.396	68.08	-6.1163	-3.0594	-1.6061	1.7229	-1.8811
1KMD	-11956.7	-1.82685	-248.455	1.176	98.3035	97.215	-2.9503	-2.49735	3.905	4.8655	-0.49805
1KOZ	-2725.93	-0.54885	-50.9555	4.3635	91.18	82.01	-4.84785	-2.833	0.62005	-0.8885	-2.44215
1KQH	-2805.45	0.2983	-56.324	2.08	98.749	93.66	-5.3459	-2.7564	0.57915	1.02335	-3.15915
1KQI	-2930.6	0.06505	-58.729	3.5205	99.722	93.16	-5.0018	-2.4596	0.82725	1.3407	-2.8283
1KRW	-13941.2	-1.49888	-282.922	1.585	93.7238	89.1654	-1.45012	-1.75088	2.68369	1.45285	-0.961038
1KUN	-4450.67	-1.0504	-94.0065	1.008	94.6425	89.685	-3.14255	-2.6973	0.95155	3.7523	-2.32805
1KV4	-2849.11	-0.0602	-70.0565	0.4405	98.75	97.27	-0.3895	2.50035	6.5275	4.1237	1.50525
1L1I	-6444.71	-2.22155	-136.248	4.7785	91.704	78.985	-2.4519	-1.6486	-0.66495	-0.6814	-2.98335
1L3G	-10917.7	-0.789895	-227.556	3.39579	94.8216	91.1211	-3.01074	-2.66558	3.21868	2.37084	-1.80711
1L3H	-4932.25	-1.2935	-103.594	1.44533	99.894	96.0233	-3.0474	-0.3163	4.92683	2.37713	-0.0316667
1L3Y	-2538.33	-0.752533	-53.1393	6.57	86.666	73.3533	-5.3566	-1.8542	-0.990133	1.15647	-0.555333
1L7B	-7632.24	-1.1869	-169.474	4.544	91.443	88.43	-2.7543	-2.2032	2.5799	3.184	-0.4513
1L7Y	-9145.48	-1.77946	-177.372	0.97625	99.6367	98.9708	-1.83737	-1.03017	2.90375	2.7575	0.521792
1LD6	-4423.97	-0.0258	-95.924	1.309	99.284	91.7	-2.7652	-0.866	3.5741	5.9149	-1.9955
1LFC	-1246.05	2.2825	-27.989	4.8755	98.26	96.18	-5.37695	-2.6381	-1.1263	4.8923	-3.19675
1LKJ	-15868.7	-2.07748	-337.077	0.805161	98.1416	94.4548	0.38071	1.39384	5.35871	4.40745	0.150226
1M2F	-16217.9	-1.72372	-316.518	1.2996	98.3768	96.132	-0.07576	-0.79732	3.74716	4.82868	-0.42808
1M30	-5250.47	-2.12015	-103.198	2.758	93.125	83.53	-2.6852	0.7005	-0.26155	1.78385	-1.7954
1M5Z	-8727.06	-1.61515	-169.014	0.8485	98.5955	91.67	-2.3051	-0.504	2.1798	3.27115	-0.5388
1MB6	-2588.56	-0.57425	-54.204	1.77	97.273	92.685	-2.66235	-1.62095	0.8553	1.67825	-2.5522
1MG8	-7791.14	-1.6014	-151.869	0.948	95.919	92.61	-2.3938	-1.5852	3.9289	2.6436	1.1866
1MK3	-18045.1	-0.8208	-385.129	0.703	97.331	96.95	-2.4195	-1.7429	5.1742	3.7347	-1.8334
1MMC	-1996.64	-1.18904	-39.9915	1.92038	99.3135	93.7	-6.86354	-2.28123	2.53112	3.34881	-1.51554
1MNL	-8116.8	-0.764905	-172.58	3.3519	90.9567	84.7381	-3.5781	-2.33033	-0.144381	1.97005	-2.8751
1MPZ	-2656.98	-0.801909	-53.4059	16.7164	79.0223	59.7909	-5.54686	-2.96632	-3.17591	-3.69495	-2.95841
1MUT	-12728.4	-1.03053	-257.489	1.97733	95.802	92.04	-2.735	-2.5124	0.8594	3.10307	-0.898667
1MZK	-11529.5	-1.3084	-225.053	3.964	96.1383	87.5267	-1.4436	-1.5959	0.6961	-0.285767	-1.38653
1N4I	-7543.92	-2.07468	-156.548	4.654	95.362	86.732	-1.64868	-2.24648	0.83996	0.19792	-1.2292
1N88	-8984.53	-0.871034	-182.71	5.35517	95.3028	92.3862	-2.37248	-1.85048	2.43786	2.29662	-0.744483
1NBL	-3599.89	-1.6621	-83.7855	4.515	97.957	90.02	-1.70555	-0.9308	2.80985	0.42505	-1.4023
1ND9	-3692.07	-1.251	-79.916	16.029	92.768	88.02	-2.3658	-2.4825	0.9281	-0.5291	-1.7778
1NE5	-2999.59	-0.83665	-70.9885	2.608	96.625	81.665	-4.6706	-1.72415	-0.0668	0.36615	-1.40895
1NER	-7439.65	-2.08637	-150.15	2.61	96.247	90.3233	-3.177	-2.32333	2.5707	4.6567	-1.8439
1NFA	-15103.4	-0.2394	-282.878	1.769	94.771	87.25	-5.1803	-4.0975	1.4234	2.0449	-1.253
1NI7	-17319.7	-1.96585	-347.567	0.8945	99.286	97.48	-0.6914	0.1027	5.0902	3.8995	0.77095
1NMV	-13744.8	-1.041	-298.47	2.38	98.76	95.7	-2.421	-0.645	2.953	4.796	-0.97
1NOR	-3783.68	-1.25795	-100.896	6.21526	98.3084	96.2105	-3.01642	-1.57179	2.73484	1.39216	-0.675368
1NWV	-10170.8	-0.156143	-202.496	4.73357	96.3264	91.519	-4.13762	-2.0649	1.8215	1.3261	-1.42788
1NY9	-9314.5	-1.8235	-208.811	1.19	98.478	97.6	-0.7762	-0.5698	5.811	3.3754	-0.8364
1NYN	-10051.9	-1.61365	-211.855	0.3835	98.991	94.15	-2.6105	-1.0029	3.5963	5.0214	-0.5073
1O78	-6736.09	-1.1651	-123.554	2.023	97.011	91.11	-3.28995	-0.06795	-0.0214	3.60175	-0.58165
1O8R	-8394.61	-1.59093	-166.121	4.03833	96.4133	90.83	-3.0753	-4.06863	0.7578	2.7758	-2.36707
1O8T	-5847.5	-0.460559	-143.808	0.226324	97.6678	95.8206	-0.388882	1.53147	6.06274	3.85321	-0.934265
1OCA	-18050.3	-1.9952	-349.908	1.7	97.885	90.55	-1.7993	-1.07525	1.91075	2.51145	-0.64545
1OJG	-13108.3	-1.24	-252.312	3.774	95.895	88.51	-2.9389	-2.4585	1.0432	0.8023	-1.977
1OQ3	-6891.05	-1.33697	-145.261	0.58	98.335	94.1367	-1.9801	-1.2877	2.7372	1.3493	0.717067
1ORX	-1644.56	-1.65505	-31.506	3.984	98.8625	91.595	-3.69395	-2.02195	-1.7024	-2.51205	0.8209
1PBU	-20975.6	-2.4277	-399.761	3.724	97.4355	90.615	-0.935	-1.5447	2.1831	1.57655	-1.5622
1PLO	-10277.4	-0.7466	-205.284	3.618	92.084	85.87	-2.9733	-2.9251	1.5569	1.6411	-2.6097
1PMC	-1948.94	-0.913306	-42.3481	3.77667	91.915	90.55	-4.44272	-1.10983	1.31322	3.23297	-1.31936
1Q27	-15646.3	-0.5623	-319.996	1.713	95.148	91.43	-2.5223	-2.2681	2.7086	2.3	-1.1549
1Q2K	-2119.27	0.0292857	-50.0938	4.00286	94.4143	92.9524	-1.1501	-0.23	2.514	0.669619	0.557667
1Q2N	-5629.6	-2.755	-133.778	1.512	100	99.81	0.5733	0.765	5.3378	2.4676	0.2848
1QFD	-2406.32	-1.6944	-50.753	1.512	96.67	91.75	-5.5145	-1.303	1.7514	2.802	-1.9002
1QHK	-3978.14	-1.4903	-86.7035	2.025	96.667	89.375	-2.74525	-1.29395	2.24335	0.661	-0.84205
1QK6	-2137.15	-0.4566	-45.468	1.178	99.677	90.01	-5.1167	-2.9525	1.0457	1.4371	-1.7082
1QK7	-2352.92	-0.1578	-47.0565	1.836	92.666	88.4	-4.3517	-2.08925	1.6521	0.9861	-1.6531
1QKH	-6577.7	-0.978905	-128.553	3.73095	94.3676	89.3571	-3.25648	-2.61638	1.22238	1.11852	-1.003
1QQV	-5667.03	-1.283	-120.76	4.64	98.46	96.6	-1.382	-1.515	3.994	2.221	-0.619
1QU5	-17001.8	-0.802687	-338.77	5.70625	91.7369	83.5063	-3.20938	-2.63425	0.374875	3.21312	-1.79463
1R63	-6334.48	-2.7422	-138.945	0.9025	100	99.715	-0.8534	-0.0491	5.5014	2.0866	0.3249
1ROO	-2748.4	-0.88055	-57.546	1.8795	94.849	90.46	-3.0655	-1.2973	0.2781	1.45215	-3.227
1SPY	-9529.45	-2.4716	-198.72	0.53025	97.8725	95.765	-0.4705	0.7124	4.4284	4.75088	0.31105
1TFS	-4549.62	-0.6429	-101.031	3.7275	97.588	93.55	-3.22085	-2.21895	1.8013	1.32415	-2.37735
1TIH	-3577.85	-0.99375	-74.87	1.251	98.628	91.45	-4.0101	-2.19395	0.7856	1.7263	-0.13695
1TLE	-3872.54	-0.678286	-78.3543	1.26429	96.4264	87.5929	-5.07157	-3.24964	0.375786	4.205	-1.60993
1TNW	-15275.9	-1.02348	-343.881	1.6887	99.213	95.8696	0.145696	0.328609	4.62287	3.66622	-0.111957
1TOF	-12044.3	-1.30774	-246.423	2.85348	97.5074	93.9174	0.234522	-0.281348	2.69613	2.12765	-0.796261
1UGL	-2906.34	-0.488	-69.6463	2.73767	87.4307	81.06	-5.822	-3.6534	-1.4958	0.608833	-3.08357
1VTP	-1841.59	-1.7483	-47.86	0.8855	99.3745	98.495	1.9459	4.3322	7.69965	2.87295	2.00305
1WKT	-7923.03	-1.61675	-156.257	4.3255	96.1625	83.8	-2.72355	-2.1333	1.1611	0.90395	-0.8012
1ZAQ	-3121.46	-0.161333	-57.8108	3.125	89.4867	81.675	-5.42175	-2.04408	-0.23275	2.22275	-2.27967
2BBG	-3017.94	-1.1291	-65.2407	4.10667	98.3343	92.5167	-4.388	-2.83027	1.77083	0.604933	-1.69797
2CPB	-3567.91	0.85904	-85.182	0.3752	99.584	98.896	-0.07272	2.45208	5.6804	2.95844	1.1966
2CPS	-3432.69	1.05072	-84.662	0	98.584	94.4	0.07392	2.81792	5.07532	3.85408	0.60992
2EZL	-9981.79	-1.68962	-216.972	0.842069	99.6448	97.5345	-1.88683	-0.888241	5.36407	4.17386	-0.949241
2HID	-8668.87	-2.31688	-180.088	1.4536	100	97.608	0.56868	0.63972	4.6502	3.568	0.33768
2IGG	-5145.53	-1.67748	-118.724	1.94333	92.4752	88.7	-0.911778	-0.293963	3.0947	1.34056	0.301556
2IGH	-5185.07	-1.78692	-118.573	0.359583	95.5537	93.0417	-0.435833	0.270125	3.22992	2.87837	0.00925
2KTX	-2689.74	-1.57989	-57.0989	4.95444	89.6622	87.0389	-4.17306	-1.49817	-3.30833	2.09528	-2.32456
2LFB	-8736.73	-1.44565	-197.406	1.0575	92.299	87.53	-2.67165	-1.59725	3.24185	2.90125	-0.9342
2MOB	-9084.73	-0.6796	-179.436	4.31467	95.7967	93.6533	-1.37253	-2.0288	2.64313	1.3212	-0.997067
2PTA	-2488.44	-1.69665	-57.288	2.901	96.8185	85.52	-3.58915	-1.9217	2.61485	2.6882	-3.26105
2R63	-6352.39	-2.6018	-136.632	0.505	98.278	97.475	-0.8652	-0.6977	5.47905	0.7685	0.0395
2SOB	-7938.82	-0.2722	-155.142	3.413	92.476	86.08	-1.3046	-1.9139	1.2304	2.3072	-1.4446
3BDO	-18871	-0.11588	-352.906	0.736	98.8412	95.324	-3.97464	-3.37828	3.48148	4.09948	-0.80044
3GB1	-5049.79	-2.16419	-118.288	0.914063	99.8266	96.75	1.36234	1.45309	3.95622	5.35781	1.83356
3HSF	-9447.62	-1.81723	-183.615	1.07867	97.0397	91.87	-2.15387	-2.3718	2.78193	2.90357	-1.93817
3PDZ	-4061.36	-1.54425	-92.7895	7.0935	98.39	89.595	-3.14815	-1.33285	1.64585	-1.0915	-0.41235
